# Supplementary material for: Construction of 11 metabolic-related lncRNAs to predict the prognosis in lung adenocarcinoma
Source: PubMed Central journal article supplement (PMC10726503; doi:10.1186/s12920-023-01764-9), 2023-12-18
Supplement: 12920_2023_1764_MOESM1_ESM.pdf [file 12920_2023_1764_MOESM1_ESM.pdf]

Supplementary materials Table 1

| gene    | conMean  | treatMean | logFC    | pValue   | fdr      |
|---------|----------|-----------|----------|----------|----------|
| PRIM1   | 1.981292 | 4.173344  | 1.074762 | 8.23E-13 | 2.10E-12 |
| DAO     | 0.075084 | 0.01412   | -2.41074 | 1.85E-21 | 1.09E-20 |
| ADH1A   | 0.252589 | 0.074431  | -1.76281 | 3.17E-24 | 2.48E-23 |
| GGCT    | 10.07999 | 36.31863  | 1.849216 | 4.76E-32 | 3.65E-30 |
| GLDC    | 0.186123 | 1.431987  | 2.94369  | 2.42E-08 | 4.45E-08 |
| PNMT    | 1.214935 | 0.580306  | -1.06599 | 3.36E-11 | 7.75E-11 |
| CYP3A7  | 0.556541 | 0.147775  | -1.91309 | 1.39E-24 | 1.21E-23 |
| AOC3    | 67.20559 | 11.69627  | -2.52253 | 3.38E-32 | 3.64E-30 |
| ADSSL1  | 0.899895 | 3.174804  | 1.818839 | 1.03E-15 | 3.31E-15 |
| LDHB    | 86.12069 | 179.085   | 1.056213 | 1.85E-09 | 3.76E-09 |
| PRIM2   | 1.587571 | 3.362011  | 1.082504 | 3.45E-25 | 3.39E-24 |
| CA2     | 31.95626 | 11.75212  | -1.44318 | 1.84E-24 | 1.57E-23 |
| DTYMK   | 5.28131  | 13.92916  | 1.39914  | 4.49E-25 | 4.20E-24 |
| PDE8B   | 2.09482  | 0.833355  | -1.32982 | 3.08E-24 | 2.44E-23 |
| PTGDS   | 87.65013 | 28.54209  | -1.61867 | 7.16E-23 | 4.86E-22 |
| MGST1   | 20.05196 | 43.54529  | 1.118774 | 1.39E-11 | 3.35E-11 |
| AK4     | 0.595046 | 3.925748  | 2.721894 | 5.04E-17 | 1.81E-16 |
| PAH     | 0.010784 | 0.836447  | 6.277244 | 2.44E-10 | 5.29E-10 |
| OPLAH   | 2.627307 | 7.297356  | 1.473789 | 1.09E-17 | 4.18E-17 |
| ENTPD2  | 0.358122 | 1.647913  | 2.202119 | 6.34E-11 | 1.44E-10 |
| PLA2G2F | 0.001133 | 0.068431  | 5.915976 | 2.14E-17 | 7.89E-17 |
| FMO3    | 7.115519 | 3.331032  | -1.095   | 1.85E-17 | 6.92E-17 |
| P4HA3   | 0.378323 | 1.994301  | 2.398194 | 5.16E-24 | 3.92E-23 |
| UGDH    | 11.11011 | 45.11215  | 2.021642 | 6.26E-23 | 4.32E-22 |
| GNPNAT1 | 3.653413 | 11.36811  | 1.637676 | 2.90E-27 | 4.44E-26 |
| SRM     | 16.07002 | 35.739    | 1.153128 | 1.54E-22 | 1.02E-21 |
| CAT     | 100.1085 | 29.37069  | -1.76912 | 1.58E-32 | 2.61E-30 |
| PAPSS2  | 55.91883 | 22.05491  | -1.34223 | 1.01E-25 | 1.12E-24 |
| G6PC2   | 0.04227  | 0.008296  | -2.34912 | 2.57E-09 | 5.15E-09 |
| ENTPD8  | 0.074407 | 1.856013  | 4.640619 | 2.66E-26 | 3.34E-25 |
| IL4I1   | 1.798208 | 7.689022  | 2.09624  | 5.76E-16 | 1.88E-15 |
| POLR2H  | 7.234796 | 17.67116  | 1.288373 | 2.02E-29 | 4.83E-28 |
| MTHFD2  | 6.031852 | 19.05726  | 1.659668 | 3.45E-22 | 2.22E-21 |
| PIP5K1B | 7.731027 | 1.70966   | -2.17695 | 3.10E-30 | 9.51E-29 |
| AGMAT   | 0.237367 | 1.544106  | 2.701582 | 7.71E-29 | 1.64E-27 |
| OAT     | 20.19376 | 43.52199  | 1.107835 | 6.16E-14 | 1.73E-13 |
| FMO2    | 46.49827 | 5.219547  | -3.15518 | 2.45E-32 | 3.13E-30 |
| POLE2   | 0.424422 | 2.431185  | 2.51809  | 6.13E-30 | 1.74E-28 |
| NMNAT2  | 0.439092 | 3.090996  | 2.815476 | 1.76E-05 | 2.69E-05 |
| LYPLA1  | 11.61954 | 25.41358  | 1.129047 | 6.25E-18 | 2.46E-17 |
| SGMS2   | 22.9437  | 10.17287  | -1.17337 | 2.45E-12 | 6.12E-12 |
| UCK2    | 1.777921 | 4.749837  | 1.417687 | 1.04E-09 | 2.18E-09 |

|               |          |          |          |          |          |
|---------------|----------|----------|----------|----------|----------|
| OGDHL         | 0.055035 | 0.716462 | 3.702475 | 1.58E-09 | 3.26E-09 |
| PTGIS         | 12.30017 | 5.539555 | -1.15084 | 4.21E-18 | 1.71E-17 |
| GCAT          | 3.137662 | 7.498838 | 1.256977 | 4.36E-15 | 1.34E-14 |
| DGKA          | 1.578806 | 3.28428  | 1.056743 | 3.18E-15 | 9.84E-15 |
| CA9           | 0.281882 | 12.69819 | 5.493389 | 5.37E-23 | 3.75E-22 |
| ACY3          | 0.405534 | 2.967306 | 2.87126  | 3.75E-20 | 1.86E-19 |
| CYP2E1        | 0.094587 | 0.264887 | 1.485668 | 0.003246 | 0.004135 |
| HAGHL         | 0.575599 | 1.511342 | 1.392694 | 2.22E-12 | 5.60E-12 |
| PC            | 1.946121 | 7.100863 | 1.867393 | 1.79E-25 | 1.84E-24 |
| ALOX15        | 9.771303 | 2.355191 | -2.05271 | 4.25E-12 | 1.04E-11 |
| MGAM          | 0.28335  | 0.139923 | -1.01795 | 5.23E-09 | 1.01E-08 |
| NME2          | 12.25682 | 26.65979 | 1.121081 | 2.20E-18 | 9.26E-18 |
| TXNRD1        | 20.41002 | 67.0796  | 1.716596 | 6.34E-06 | 9.90E-06 |
| GSR           | 19.6613  | 42.16629 | 1.100731 | 1.06E-09 | 2.20E-09 |
| SORD          | 1.454341 | 4.282422 | 1.558061 | 3.86E-25 | 3.70E-24 |
| CANT1         | 13.55119 | 28.54737 | 1.074939 | 2.07E-24 | 1.71E-23 |
| ALDH2         | 50.96459 | 24.04908 | -1.08351 | 1.11E-23 | 8.21E-23 |
| CA7           | 0.01157  | 0.084203 | 2.863469 | 6.11E-12 | 1.50E-11 |
| ASNS          | 2.845765 | 10.04325 | 1.819338 | 2.05E-27 | 3.42E-26 |
| ALDH1B1       | 6.122095 | 14.50188 | 1.244142 | 9.09E-21 | 4.78E-20 |
| GPD1          | 18.03507 | 1.220743 | -3.88497 | 2.79E-30 | 9.32E-29 |
| NT5E          | 4.455788 | 18.54388 | 2.05719  | 2.90E-09 | 5.79E-09 |
| ACHE          | 0.862498 | 5.165416 | 2.582291 | 2.88E-07 | 4.99E-07 |
| PAICS         | 4.651156 | 18.8617  | 2.019799 | 1.28E-32 | 2.61E-30 |
| L2HGDH        | 0.815554 | 1.7787   | 1.124972 | 7.62E-23 | 5.13E-22 |
| TSTA3         | 11.77304 | 33.45159 | 1.506588 | 1.18E-26 | 1.62E-25 |
| ALOX5         | 46.25472 | 14.17334 | -1.70642 | 4.96E-27 | 7.32E-26 |
| DDO           | 3.127453 | 1.393097 | -1.16669 | 7.74E-19 | 3.41E-18 |
| ENPP6         | 0.21211  | 0.095272 | -1.15469 | 3.94E-21 | 2.16E-20 |
| DNMT3B        | 0.372217 | 1.737075 | 2.222443 | 1.59E-21 | 9.61E-21 |
| GUCY1A2       | 2.955166 | 0.850718 | -1.79649 | 5.16E-26 | 6.28E-25 |
| GAMT          | 3.319312 | 7.802927 | 1.233131 | 1.92E-10 | 4.23E-10 |
| NME1-<br>NME2 | 0.292537 | 0.659072 | 1.171816 | 1.41E-10 | 3.13E-10 |
| PDE1B         | 1.700407 | 0.629464 | -1.43369 | 2.27E-24 | 1.85E-23 |
| OTC           | 0.642895 | 0.051824 | -3.6329  | 1.44E-31 | 7.87E-30 |
| PLA2G4A       | 3.680481 | 21.7583  | 2.5636   | 1.58E-11 | 3.76E-11 |
| CAD           | 3.722343 | 9.039393 | 1.280015 | 2.72E-22 | 1.77E-21 |
| GMDS          | 2.596589 | 7.556456 | 1.541092 | 7.34E-28 | 1.28E-26 |
| MAOB          | 18.10087 | 6.806286 | -1.41112 | 1.31E-24 | 1.16E-23 |
| NME4          | 9.120985 | 26.17819 | 1.521104 | 3.72E-25 | 3.61E-24 |
| RDH16         | 0.125197 | 0.254347 | 1.022601 | 0.001374 | 0.001802 |
| SGPL1         | 7.312836 | 16.39058 | 1.164364 | 7.13E-28 | 1.27E-26 |
| CYP1A2        | 0.760882 | 0.077356 | -3.29809 | 1.05E-30 | 4.52E-29 |

|         |          |          |          |          |          |
|---------|----------|----------|----------|----------|----------|
| CDO1    | 5.110574 | 0.900199 | -2.50517 | 5.25E-30 | 1.55E-28 |
| GPX3    | 309.6442 | 68.40297 | -2.17848 | 1.66E-30 | 5.79E-29 |
| HK3     | 15.55438 | 4.999439 | -1.63748 | 8.16E-24 | 6.08E-23 |
| NPR1    | 15.98451 | 2.84166  | -2.49187 | 1.29E-30 | 5.14E-29 |
| B4GALT2 | 6.970077 | 17.75021 | 1.34859  | 1.12E-27 | 1.92E-26 |
| SYNJ2   | 1.015    | 3.273264 | 1.68925  | 3.26E-26 | 4.03E-25 |
| PKM     | 78.26624 | 163.1892 | 1.060084 | 1.30E-24 | 1.16E-23 |
| AOX1    | 4.600314 | 2.276671 | -1.01481 | 1.98E-17 | 7.39E-17 |
| UGT8    | 0.695026 | 3.382405 | 2.282911 | 1.24E-08 | 2.32E-08 |
| AK1     | 15.11649 | 7.186191 | -1.07282 | 4.81E-22 | 3.03E-21 |
| CBS     | 0.068678 | 0.192113 | 1.484028 | 0.000322 | 0.000447 |
| AZIN2   | 0.543998 | 1.431692 | 1.396048 | 4.25E-18 | 1.71E-17 |
| ADH1B   | 65.77864 | 7.174922 | -3.19658 | 6.91E-32 | 4.42E-30 |
| GOT1    | 11.77184 | 25.40319 | 1.10967  | 1.07E-20 | 5.58E-20 |
| ACP6    | 0.91972  | 2.519866 | 1.45408  | 6.11E-25 | 5.52E-24 |
| AANAT   | 0.062977 | 0.164643 | 1.386454 | 2.75E-07 | 4.80E-07 |
| FMO1    | 0.388348 | 1.031506 | 1.409328 | 4.35E-09 | 8.49E-09 |
| HPGDS   | 5.203569 | 2.215886 | -1.23162 | 1.95E-18 | 8.26E-18 |
| DGAT1   | 7.460956 | 15.10652 | 1.017739 | 7.03E-18 | 2.75E-17 |
| ALAS2   | 1.418941 | 0.093998 | -3.91604 | 2.94E-24 | 2.35E-23 |
| CKMT1A  | 0.117164 | 0.837112 | 2.836891 | 3.46E-11 | 7.97E-11 |
| CBR3    | 2.638131 | 9.202108 | 1.802448 | 5.15E-09 | 9.99E-09 |
| PYGM    | 0.556649 | 0.267904 | -1.05505 | 2.67E-21 | 1.49E-20 |
| ARG2    | 1.24401  | 3.05455  | 1.295961 | 3.84E-09 | 7.53E-09 |
| XDH     | 0.23118  | 4.425829 | 4.258859 | 1.72E-26 | 2.32E-25 |
| IDO2    | 0.074673 | 0.166386 | 1.155883 | 0.004215 | 0.005309 |
| PLA2G1B | 29.70453 | 7.135132 | -2.05767 | 7.63E-26 | 9.01E-25 |
| BCO1    | 0.168468 | 0.9749   | 2.532776 | 1.27E-10 | 2.84E-10 |
| OXCT2   | 0.073875 | 0.236058 | 1.675974 | 9.45E-09 | 1.79E-08 |
| ATIC    | 10.37542 | 26.80955 | 1.369577 | 1.41E-30 | 5.14E-29 |
| DNMT3A  | 2.297156 | 4.798356 | 1.062691 | 1.10E-18 | 4.78E-18 |
| GMPPA   | 4.875923 | 10.74442 | 1.13984  | 1.03E-29 | 2.81E-28 |
| BST1    | 4.971782 | 2.456348 | -1.01725 | 6.43E-22 | 4.01E-21 |
| ISYNA1  | 6.26707  | 15.16714 | 1.275086 | 1.03E-13 | 2.84E-13 |
| BDH1    | 0.971584 | 2.700225 | 1.474669 | 4.82E-20 | 2.33E-19 |
| POLR3G  | 0.612907 | 1.233502 | 1.00902  | 2.53E-07 | 4.43E-07 |
| SULT1A3 | 0.016803 | 0.03913  | 1.219534 | 4.60E-08 | 8.35E-08 |
| AHCY    | 22.26135 | 46.90591 | 1.075229 | 3.12E-21 | 1.72E-20 |
| ITPKA   | 0.191167 | 7.28925  | 5.252861 | 2.13E-25 | 2.15E-24 |
| ACMSD   | 0.073282 | 0.721089 | 3.298642 | 7.42E-09 | 1.41E-08 |
| PDE2A   | 2.806664 | 0.901475 | -1.6385  | 1.91E-24 | 1.61E-23 |
| HAL     | 0.347448 | 2.285429 | 2.717595 | 8.42E-07 | 1.42E-06 |
| ETNK2   | 1.058564 | 3.123499 | 1.561055 | 4.09E-12 | 1.01E-11 |
| DMGDH   | 0.183331 | 0.706405 | 1.946046 | 0.000122 | 0.000176 |

|          |          |          |          |          |          |
|----------|----------|----------|----------|----------|----------|
| G6PD     | 18.99821 | 52.44721 | 1.465003 | 1.58E-05 | 2.42E-05 |
| TAT      | 0.071223 | 0.188067 | 1.400839 | 0.000349 | 0.000482 |
| PLPP3    | 30.98097 | 12.88434 | -1.26576 | 3.92E-28 | 7.34E-27 |
| GCLM     | 4.878471 | 11.09823 | 1.185829 | 8.87E-10 | 1.86E-09 |
| GPX2     | 1.210418 | 74.35104 | 5.940775 | 3.05E-07 | 5.27E-07 |
| GPI      | 17.91683 | 42.96202 | 1.261746 | 1.06E-26 | 1.48E-25 |
| CBR1     | 21.20808 | 77.41373 | 1.867975 | 7.37E-07 | 1.25E-06 |
| GSTM5    | 2.610758 | 0.497459 | -2.39182 | 5.43E-31 | 2.60E-29 |
| PCYT1B   | 0.736102 | 0.200962 | -1.87298 | 1.27E-20 | 6.56E-20 |
| PYCR1    | 3.075311 | 44.82049 | 3.865354 | 1.18E-32 | 2.61E-30 |
| ADCY8    | 0.713828 | 0.07939  | -3.16855 | 1.37E-29 | 3.50E-28 |
| HMBS     | 2.993156 | 7.429838 | 1.311663 | 6.11E-25 | 5.52E-24 |
| PTGES    | 2.951446 | 25.11033 | 3.088787 | 2.30E-26 | 3.04E-25 |
| PDE1C    | 0.931023 | 0.404479 | -1.20275 | 4.29E-21 | 2.30E-20 |
| CPT1B    | 0.186009 | 0.747218 | 2.006158 | 6.73E-16 | 2.19E-15 |
| CEL      | 0.188049 | 1.677859 | 3.157441 | 0.000826 | 0.001102 |
| MIF      | 17.81028 | 44.55402 | 1.322846 | 4.76E-19 | 2.16E-18 |
| P4HA1    | 18.91614 | 40.10955 | 1.084328 | 3.57E-18 | 1.47E-17 |
| PMM2     | 1.22495  | 3.000403 | 1.292433 | 3.72E-29 | 8.38E-28 |
| PLA2G2C  | 0.01501  | 0.151089 | 3.331384 | 3.73E-18 | 1.53E-17 |
| PLCE1    | 3.405438 | 1.448682 | -1.2331  | 2.52E-19 | 1.16E-18 |
| GART     | 4.83038  | 10.18169 | 1.075769 | 3.10E-30 | 9.51E-29 |
| PSPH     | 2.925579 | 7.655782 | 1.387828 | 1.54E-17 | 5.83E-17 |
| LPL      | 51.31269 | 13.22339 | -1.95622 | 9.88E-26 | 1.11E-24 |
| ACSM4    | 0.024818 | 0.10175  | 2.035562 | 0.000589 | 0.000798 |
| TYMS     | 2.492057 | 10.49907 | 2.074852 | 3.74E-27 | 5.62E-26 |
| CP       | 4.276879 | 58.89389 | 3.783488 | 3.67E-22 | 2.34E-21 |
| GPT2     | 1.069293 | 12.05352 | 3.494725 | 4.27E-32 | 3.64E-30 |
| QPRT     | 4.607712 | 15.2275  | 1.724556 | 4.04E-06 | 6.39E-06 |
| ACACB    | 2.35728  | 1.008217 | -1.22532 | 2.99E-20 | 1.49E-19 |
| PLA2G2D  | 1.772855 | 4.273007 | 1.269177 | 4.08E-05 | 6.09E-05 |
| TYRP1    | 1.471967 | 0.725511 | -1.02067 | 2.05E-13 | 5.58E-13 |
| CKM      | 0.116687 | 1.074732 | 3.203257 | 4.41E-13 | 1.16E-12 |
| ACADL    | 6.603539 | 0.815548 | -3.0174  | 6.69E-32 | 4.42E-30 |
| PDE5A    | 6.311687 | 2.338649 | -1.43235 | 1.09E-25 | 1.18E-24 |
| LTC4S    | 0.09649  | 0.030889 | -1.64328 | 4.48E-16 | 1.47E-15 |
| MIOX     | 0.054551 | 1.009224 | 4.209504 | 4.02E-21 | 2.19E-20 |
| GPT      | 0.293514 | 1.260494 | 2.102488 | 2.02E-10 | 4.42E-10 |
| LPGAT1   | 5.6419   | 13.58678 | 1.267951 | 1.80E-25 | 1.84E-24 |
| GAD1     | 0.036469 | 0.539918 | 3.887993 | 4.16E-21 | 2.25E-20 |
| ACP5     | 132.7722 | 41.05215 | -1.69342 | 2.76E-27 | 4.32E-26 |
| PAFAH1B3 | 5.402157 | 27.44948 | 2.345171 | 9.34E-29 | 1.94E-27 |
| CA4      | 19.03914 | 1.007447 | -4.24019 | 9.60E-32 | 5.66E-30 |
| HMOX1    | 81.32346 | 27.95556 | -1.54054 | 9.19E-07 | 1.53E-06 |

|          |          |          |          |          |          |
|----------|----------|----------|----------|----------|----------|
| FTCD     | 0.03249  | 0.242418 | 2.899423 | 2.85E-10 | 6.15E-10 |
| IDH2     | 23.39706 | 58.19575 | 1.314587 | 2.32E-24 | 1.87E-23 |
| PYCR3    | 2.724226 | 7.842162 | 1.525405 | 1.10E-25 | 1.18E-24 |
| AK7      | 2.581035 | 1.095922 | -1.2358  | 2.40E-11 | 5.61E-11 |
| TDO2     | 0.331708 | 1.244674 | 1.907781 | 2.90E-14 | 8.39E-14 |
| HGD      | 0.582679 | 8.431979 | 3.855098 | 7.74E-09 | 1.47E-08 |
| ADCY10   | 0.019379 | 0.047851 | 1.304046 | 1.78E-05 | 2.73E-05 |
| POLE     | 1.260238 | 2.751164 | 1.126346 | 7.72E-18 | 2.99E-17 |
| CYP2D6   | 0.248828 | 1.070527 | 2.105098 | 2.01E-09 | 4.06E-09 |
| ASAH2    | 0.064859 | 0.153057 | 1.238683 | 1.10E-12 | 2.81E-12 |
| GFPT1    | 9.261466 | 23.06529 | 1.316411 | 2.68E-28 | 5.15E-27 |
| TPI1     | 91.29131 | 218.31   | 1.257829 | 2.49E-26 | 3.23E-25 |
| CNDP1    | 0.012887 | 0.035739 | 1.471624 | 0.008021 | 0.009875 |
| DGAT2    | 1.021776 | 2.077008 | 1.023428 | 1.82E-07 | 3.20E-07 |
| AWAT2    | 0.410375 | 0.074934 | -2.45325 | 1.18E-18 | 5.04E-18 |
| PLPP2    | 2.282388 | 13.31086 | 2.543988 | 2.43E-27 | 3.88E-26 |
| RRM2     | 1.120227 | 11.8647  | 3.404813 | 1.17E-29 | 3.10E-28 |
| CYP26A1  | 0.044925 | 0.32351  | 2.848223 | 7.58E-05 | 0.000111 |
| PFKP     | 7.575957 | 36.97509 | 2.287054 | 1.61E-24 | 1.39E-23 |
| PDE11A   | 0.024062 | 0.078069 | 1.697991 | 0.000664 | 0.000891 |
| ALDH18A1 | 9.250779 | 31.39324 | 1.762807 | 7.09E-33 | 2.61E-30 |
| PHOSPHO1 | 1.010166 | 0.367421 | -1.45909 | 6.53E-19 | 2.90E-18 |
| ACY1     | 0.763196 | 1.616246 | 1.082522 | 1.91E-19 | 8.92E-19 |
| ADA      | 1.719954 | 3.477062 | 1.015499 | 2.92E-10 | 6.26E-10 |
| NT5C1A   | 0.046354 | 0.282322 | 2.606587 | 0.001163 | 0.001533 |
| KMO      | 1.922904 | 0.868783 | -1.14622 | 1.23E-17 | 4.68E-17 |
| PLA2G5   | 1.834756 | 0.82291  | -1.15678 | 1.18E-19 | 5.60E-19 |
| GUCY2C   | 0.229144 | 0.82302  | 1.844674 | 1.30E-09 | 2.69E-09 |
| SULT1A1  | 6.111169 | 2.790438 | -1.13096 | 1.39E-20 | 7.11E-20 |
| GSTA3    | 1.549264 | 0.27052  | -2.51778 | 2.15E-21 | 1.23E-20 |
| SGPP2    | 9.505066 | 26.73751 | 1.492097 | 2.88E-15 | 8.96E-15 |
| LDHA     | 51.30674 | 144.9287 | 1.498123 | 2.40E-28 | 4.73E-27 |
| FBP1     | 182.6302 | 63.69138 | -1.51976 | 4.87E-23 | 3.46E-22 |
| CYP2F1   | 1.742859 | 0.426925 | -2.0294  | 2.24E-13 | 6.08E-13 |
| GALE     | 9.339842 | 21.1092  | 1.176402 | 1.11E-19 | 5.31E-19 |
| AOC1     | 0.341036 | 11.1892  | 5.036037 | 7.25E-15 | 2.21E-14 |
| MARS2    | 1.74322  | 3.61019  | 1.05032  | 1.71E-23 | 1.25E-22 |
| TPO      | 0.036376 | 0.098712 | 1.440224 | 4.27E-05 | 6.35E-05 |
| CA6      | 0.011205 | 0.295806 | 4.722459 | 0.000475 | 0.00065  |
| ENPP2    | 20.88041 | 9.058114 | -1.20487 | 2.45E-09 | 4.93E-09 |
| UGT2B11  | 0.002737 | 0.592225 | 7.757568 | 2.32E-08 | 4.27E-08 |
| NME1     | 3.856292 | 19.47312 | 2.336198 | 1.35E-30 | 5.14E-29 |
| CKMT1B   | 0.124265 | 0.939737 | 2.918839 | 4.19E-11 | 9.63E-11 |
| EPRS     | 16.5197  | 34.72756 | 1.071893 | 2.11E-27 | 3.45E-26 |

|         |          |          |          |          |          |
|---------|----------|----------|----------|----------|----------|
| DGKI    | 0.022458 | 0.10403  | 2.211684 | 1.19E-15 | 3.80E-15 |
| CDA     | 3.299273 | 19.26112 | 2.545472 | 9.47E-05 | 0.000138 |
| PKLR    | 0.00589  | 0.032839 | 2.479139 | 0.000964 | 0.001279 |
| UGT2B15 | 0.029279 | 1.637921 | 5.805857 | 1.17E-07 | 2.09E-07 |
| HPRT1   | 10.95809 | 24.89861 | 1.184069 | 1.86E-21 | 1.09E-20 |
| CA5A    | 0.00867  | 0.038836 | 2.163226 | 4.89E-09 | 9.52E-09 |
| ACSS3   | 2.395515 | 0.858073 | -1.48116 | 2.66E-26 | 3.34E-25 |
| LRAT    | 0.171735 | 0.749572 | 2.125884 | 2.52E-06 | 4.07E-06 |
| ASPA    | 1.173114 | 0.201983 | -2.53804 | 1.06E-30 | 4.52E-29 |
| SDS     | 1.593905 | 4.336223 | 1.443873 | 5.61E-09 | 1.08E-08 |
| CPOX    | 3.604819 | 7.598325 | 1.075755 | 7.62E-27 | 1.10E-25 |
| SCLY    | 0.135643 | 0.292157 | 1.106933 | 4.36E-20 | 2.12E-19 |
| PGM2L1  | 1.338475 | 5.627084 | 2.071797 | 1.02E-26 | 1.45E-25 |
| GCLC    | 2.79815  | 14.65564 | 2.388911 | 1.11E-11 | 2.69E-11 |
| ADCY4   | 3.584324 | 1.099103 | -1.70537 | 1.33E-25 | 1.41E-24 |
| ACSM2A  | 0.011766 | 0.003041 | -1.95185 | 1.09E-14 | 3.30E-14 |
| CYP1A1  | 3.149282 | 1.034975 | -1.60543 | 1.73E-12 | 4.36E-12 |
| CA3     | 5.374487 | 1.309692 | -2.0369  | 2.01E-21 | 1.16E-20 |
| FLAD1   | 5.006479 | 14.45154 | 1.529355 | 2.71E-31 | 1.39E-29 |
| INMT    | 85.88339 | 8.09145  | -3.40791 | 3.92E-32 | 3.64E-30 |
| CYP26B1 | 2.486412 | 1.227255 | -1.01863 | 0.000262 | 0.000366 |
| LCT     | 0.011732 | 0.235511 | 4.327242 | 3.24E-08 | 5.90E-08 |
| PLA2G3  | 1.981445 | 0.853581 | -1.21495 | 8.47E-22 | 5.24E-21 |
| AKR1B10 | 0.289059 | 48.66904 | 7.395498 | 1.21E-12 | 3.08E-12 |
| SHMT2   | 8.022795 | 24.42929 | 1.606435 | 2.21E-29 | 5.14E-28 |
| NOS1    | 0.915885 | 0.2658   | -1.78483 | 2.65E-25 | 2.64E-24 |
| INPP4B  | 1.147797 | 2.445732 | 1.091398 | 3.56E-06 | 5.68E-06 |
| PSAT1   | 1.117012 | 14.35338 | 3.683673 | 6.69E-29 | 1.47E-27 |
| CTH     | 1.373128 | 3.411248 | 1.312834 | 4.16E-16 | 1.38E-15 |
| RDH10   | 8.644265 | 25.29016 | 1.548761 | 3.56E-07 | 6.14E-07 |
| PPAT    | 0.994408 | 4.311563 | 2.116301 | 1.70E-32 | 2.61E-30 |
| INPP5K  | 15.61732 | 7.770189 | -1.00713 | 1.69E-29 | 4.19E-28 |
| ALDH3B2 | 0.525746 | 4.383546 | 3.059661 | 1.50E-16 | 5.22E-16 |
| TK1     | 5.027055 | 35.35409 | 2.814092 | 5.79E-28 | 1.06E-26 |
| ALDOA   | 95.59709 | 239.0571 | 1.322316 | 5.12E-25 | 4.73E-24 |
| ACSM5   | 0.548713 | 0.27399  | -1.00193 | 2.46E-17 | 9.04E-17 |

| gene       | conMean  | treatMean | logFC    | pValue   | fdr      |
|------------|----------|-----------|----------|----------|----------|
| AL513548.3 | 0.00616  | 0.012508  | 1.021908 | 0.014457 | 0.019379 |
| AC106882.1 | 0.021996 | 0.171364  | 2.961758 | 5.23E-13 | 3.13E-12 |
| AC037198.1 | 0.441846 | 2.778472  | 2.652675 | 0.010683 | 0.014627 |
| AL355482.1 | 0.01112  | 0.045803  | 2.04235  | 0.004574 | 0.006643 |
| AC007785.3 | 0.041422 | 0.111191  | 1.42456  | 0.000151 | 0.000274 |
| AC011511.5 | 3.244186 | 0.606559  | -2.41914 | 1.06E-10 | 4.64E-10 |
| AL138789.1 | 0.003422 | 0.186203  | 5.765884 | 5.55E-17 | 5.96E-16 |
| AC130650.2 | 0.213649 | 0.629466  | 1.558886 | 0.000243 | 0.000427 |
| AC005034.2 | 0.067594 | 0.219027  | 1.696136 | 0.03233  | 0.041121 |
| AC087741.2 | 0.827657 | 1.880058  | 1.183673 | 6.87E-10 | 2.67E-09 |
| AC091053.2 | 0.036088 | 0.14404   | 1.996881 | 0.007146 | 0.010072 |
| LINC01816  | 0.427541 | 1.273491  | 1.574653 | 4.23E-11 | 1.97E-10 |
| AC005220.1 | 0.011989 | 0.032552  | 1.441046 | 0.000302 | 0.000523 |
| AC011294.1 | 0.015767 | 0.608152  | 5.269407 | 1.92E-25 | 7.77E-24 |
| RNF157-AS1 | 0.461306 | 1.161545  | 1.332249 | 7.48E-10 | 2.89E-09 |
| AP001351.1 | 0.084526 | 0.20709   | 1.292798 | 9.28E-08 | 2.71E-07 |
| AL390778.2 | 0.414264 | 0.167029  | -1.31045 | 3.81E-11 | 1.79E-10 |
| AC005064.1 | 0.02092  | 0.147755  | 2.820277 | 0.00659  | 0.009339 |
| C10orf25   | 1.654547 | 0.758914  | -1.12443 | 5.31E-25 | 1.88E-23 |
| AC100797.1 | 0.095081 | 0.193571  | 1.025644 | 0.039425 | 0.049416 |
| LINC01398  | 0.022124 | 0.045396  | 1.03693  | 0.005871 | 0.008377 |
| AL138760.1 | 0.012839 | 0.758186  | 5.883906 | 3.55E-21 | 6.56E-20 |
| AL109761.1 | 0.074411 | 0.577189  | 2.955452 | 3.10E-11 | 1.48E-10 |
| P3H2-AS1   | 0.614302 | 0.210468  | -1.54535 | 1.23E-20 | 2.07E-19 |
| AC073529.1 | 0.039461 | 0.145981  | 1.887276 | 4.22E-20 | 6.81E-19 |
| AC243972.1 | 0.010591 | 0.067042  | 2.662292 | 3.75E-08 | 1.16E-07 |
| DDN-AS1    | 0.077907 | 0.502445  | 2.689148 | 4.26E-26 | 1.95E-24 |
| AC244502.3 | 0.018879 | 0.065995  | 1.805576 | 2.29E-05 | 4.67E-05 |
| AC016747.2 | 0.129156 | 0.331954  | 1.361864 | 0.000234 | 0.000412 |
| AL049794.1 | 0.041436 | 0.149786  | 1.853959 | 1.32E-10 | 5.68E-10 |
| AC024132.3 | 0.11016  | 0.006653  | -4.04948 | 4.79E-27 | 2.61E-25 |
| AC239803.2 | 0.051525 | 0.120201  | 1.222108 | 0.000241 | 0.000425 |
| AP002992.1 | 0.050739 | 0.185593  | 1.870981 | 1.98E-06 | 4.75E-06 |
| AL109924.2 | 0.00442  | 0.046715  | 3.401648 | 6.99E-10 | 2.71E-09 |
| AC037459.2 | 0.713056 | 0.317738  | -1.16618 | 1.06E-26 | 5.32E-25 |
| AC020663.3 | 0.096913 | 0.305522  | 1.656515 | 2.77E-05 | 5.57E-05 |
| RSF1-IT1   | 0.039012 | 0.176477  | 2.177502 | 0.00013  | 0.000238 |
| AL132655.2 | 0.06454  | 0.173735  | 1.428631 | 0.010428 | 0.014299 |
| AC125603.2 | 0.067574 | 2.163818  | 5.000966 | 0.011159 | 0.015241 |
| AC092078.2 | 0.110433 | 0.007196  | -3.93974 | 6.35E-39 | 9.87E-36 |
| AL121790.1 | 0.062864 | 0.173937  | 1.468259 | 0.033666 | 0.04268  |
| AC131254.1 | 0.014719 | 0.038164  | 1.374552 | 7.77E-10 | 2.99E-09 |
| AC069431.1 | 0.006134 | 0.019339  | 1.656473 | 0.003044 | 0.004553 |

|             |          |          |          |          |          |
|-------------|----------|----------|----------|----------|----------|
| AL031658.1  | 0.237695 | 0.07457  | -1.67244 | 2.78E-16 | 2.66E-15 |
| AC012236.1  | 0.594461 | 2.234327 | 1.910186 | 2.75E-17 | 3.06E-16 |
| AC103764.1  | 0.006623 | 0.018534 | 1.484583 | 0.006366 | 0.009051 |
| AL033519.3  | 2.337277 | 1.016631 | -1.20103 | 5.22E-17 | 5.62E-16 |
| AC078850.2  | 0.017358 | 0.173849 | 3.324196 | 2.06E-05 | 4.24E-05 |
| AC127070.1  | 0.145487 | 0.379031 | 1.381431 | 1.54E-09 | 5.68E-09 |
| AC246787.2  | 0.070318 | 0.362136 | 2.364564 | 2.23E-09 | 7.97E-09 |
| AL117190.1  | 0.013854 | 0.126712 | 3.193156 | 0.004475 | 0.006503 |
| SLC12A5-AS1 | 0.066044 | 0.241124 | 1.868266 | 1.58E-09 | 5.81E-09 |
| LINC00970   | 0.01867  | 0.07568  | 2.019172 | 1.22E-06 | 3.02E-06 |
| AC068620.2  | 0.249859 | 0.501154 | 1.004138 | 2.27E-05 | 4.65E-05 |
| AL096865.1  | 0.104267 | 0.568431 | 2.446706 | 7.22E-21 | 1.27E-19 |
| AL450992.1  | 0.017776 | 0.045403 | 1.352871 | 0.000566 | 0.000949 |
| THORLNC     | 0.165634 | 0.374929 | 1.178619 | 3.75E-07 | 9.98E-07 |
| AC022509.2  | 2.176976 | 0.626674 | -1.79654 | 4.89E-15 | 3.96E-14 |
| LINC01395   | 0.008245 | 0.425619 | 5.689869 | 1.43E-17 | 1.68E-16 |
| AL049830.3  | 0.015879 | 0.119529 | 2.91213  | 1.18E-10 | 5.11E-10 |
| AC010320.4  | 0.021163 | 0.108228 | 2.354432 | 0.038624 | 0.048481 |
| AC096719.1  | 0.014345 | 0.051511 | 1.844297 | 4.50E-07 | 1.19E-06 |
| HOTAIR      | 0.00275  | 0.442803 | 7.331306 | 1.56E-10 | 6.65E-10 |
| AC002076.1  | 0.021092 | 0.468775 | 4.474113 | 7.00E-15 | 5.52E-14 |
| AP003721.1  | 0.014437 | 0.082503 | 2.514637 | 8.69E-09 | 2.90E-08 |
| AL031963.2  | 0.041943 | 0.160367 | 1.934878 | 6.28E-11 | 2.84E-10 |
| AC074044.1  | 0.048762 | 0.147948 | 1.601256 | 3.87E-09 | 1.34E-08 |
| AC105450.1  | 0.013247 | 0.169526 | 3.677816 | 1.06E-11 | 5.36E-11 |
| AC008870.3  | 0.013148 | 0.105472 | 3.003975 | 4.35E-12 | 2.33E-11 |
| DLEU1       | 0.323421 | 0.726056 | 1.166666 | 2.87E-11 | 1.38E-10 |
| AC137932.3  | 0.25833  | 0.648461 | 1.327802 | 1.23E-11 | 6.20E-11 |
| SFTA1P      | 83.99271 | 25.41695 | -1.72447 | 2.16E-23 | 5.53E-22 |
| AC112722.1  | 1.608584 | 0.456926 | -1.81576 | 9.54E-20 | 1.49E-18 |
| LINC01093   | 0.132201 | 0.059901 | -1.14207 | 1.74E-12 | 9.81E-12 |
| AC108463.3  | 0.054638 | 0.184055 | 1.752167 | 5.78E-05 | 0.000112 |
| AC010913.1  | 0.022894 | 0.054249 | 1.244601 | 6.69E-07 | 1.71E-06 |
| LINC01982   | 0.217343 | 0.065949 | -1.72056 | 2.46E-12 | 1.35E-11 |
| AC068196.1  | 0.015951 | 0.052492 | 1.718489 | 7.03E-06 | 1.55E-05 |
| AC008897.3  | 0.626017 | 0.221423 | -1.4994  | 1.92E-18 | 2.52E-17 |
| MIR2052HG   | 0.006415 | 0.109661 | 4.095426 | 2.11E-07 | 5.82E-07 |
| AC092279.1  | 1.070097 | 2.359633 | 1.140821 | 0.000385 | 0.000658 |
| SATB2-AS1   | 0.003959 | 0.04054  | 3.35602  | 1.39E-15 | 1.21E-14 |
| AL670729.1  | 0.481976 | 1.491099 | 1.629342 | 8.00E-08 | 2.36E-07 |
| FAM95B1     | 0.016521 | 0.006234 | -1.40619 | 6.71E-10 | 2.61E-09 |
| AP003393.1  | 0.026887 | 0.01147  | -1.22903 | 2.08E-06 | 4.96E-06 |
| AL390067.1  | 0.165832 | 0.355049 | 1.098295 | 0.001046 | 0.001683 |
| LENG8-AS1   | 1.015285 | 2.118077 | 1.06087  | 2.05E-12 | 1.14E-11 |



|              |          |          |          |          |          |
|--------------|----------|----------|----------|----------|----------|
| AC114316.2   | 0.005785 | 0.087003 | 3.910593 | 1.01E-05 | 2.17E-05 |
| AC009226.1   | 0.068844 | 0.301439 | 2.130468 | 1.45E-22 | 3.22E-21 |
| AC127024.4   | 0.687244 | 1.54404  | 1.167817 | 5.10E-07 | 1.33E-06 |
| AL662791.1   | 0.270053 | 0.870644 | 1.688838 | 1.20E-13 | 7.78E-13 |
| LINC00621    | 0.036426 | 0.10976  | 1.59132  | 3.08E-05 | 6.15E-05 |
| SLC12A9-AS1  | 0.266176 | 1.316483 | 2.306234 | 1.57E-23 | 4.11E-22 |
| AC106772.1   | 0.003114 | 0.051324 | 4.04282  | 2.42E-09 | 8.62E-09 |
| AC117383.1   | 0.046597 | 0.136468 | 1.550263 | 0.003442 | 0.005106 |
| AL008718.2   | 0.022554 | 0.049987 | 1.148146 | 0.000295 | 0.000513 |
| AC003092.1   | 0.011595 | 0.596836 | 5.685732 | 1.27E-06 | 3.14E-06 |
| AC008268.1   | 21.51801 | 5.706635 | -1.91483 | 4.68E-23 | 1.13E-21 |
| AC099811.4   | 0.041658 | 0.377154 | 3.17849  | 0.00777  | 0.010884 |
| AL034345.2   | 0.00506  | 0.05491  | 3.439798 | 1.94E-10 | 8.10E-10 |
| LINC01991    | 0.015231 | 0.033082 | 1.119002 | 4.42E-05 | 8.69E-05 |
| AC138466.1   | 0.07376  | 0.28077  | 1.928477 | 1.27E-07 | 3.61E-07 |
| LINC00887    | 0.00854  | 0.139693 | 4.031932 | 2.06E-18 | 2.70E-17 |
| AC245100.7   | 0.18011  | 0.526279 | 1.546946 | 0.000256 | 0.000449 |
| NAALADL2-AS2 | 0.00849  | 0.688572 | 6.341736 | 3.11E-11 | 1.48E-10 |
| AC103740.2   | 0.005856 | 0.106325 | 4.182528 | 1.96E-14 | 1.44E-13 |
| Z99943.1     | 0.045137 | 0.262516 | 2.540035 | 3.64E-08 | 1.13E-07 |
| AC104458.1   | 0.094506 | 0.027036 | -1.80552 | 2.99E-13 | 1.84E-12 |
| AJ239322.1   | 0.024099 | 0.006755 | -1.83484 | 9.05E-13 | 5.28E-12 |
| AL136298.1   | 0.005432 | 0.096781 | 4.15511  | 6.09E-07 | 1.57E-06 |
| AC068724.1   | 0.025334 | 0.164787 | 2.701467 | 9.23E-14 | 6.10E-13 |
| AC010255.2   | 1.194753 | 0.328287 | -1.86368 | 2.32E-08 | 7.37E-08 |
| AC010542.4   | 0.010705 | 0.023341 | 1.124657 | 2.65E-05 | 5.36E-05 |
| AC093909.4   | 0.017615 | 0.004852 | -1.86    | 1.60E-09 | 5.86E-09 |
| AC087667.1   | 0.013978 | 0.156276 | 3.48287  | 2.00E-09 | 7.22E-09 |
| RASGRF2-AS1  | 0.04227  | 0.090952 | 1.105482 | 0.000633 | 0.001051 |
| AC097634.1   | 0.113027 | 0.309121 | 1.451503 | 0.000371 | 0.000636 |
| LINC01232    | 0.298787 | 0.901025 | 1.59245  | 1.35E-14 | 1.01E-13 |
| AC011700.1   | 0.005677 | 0.071909 | 3.662961 | 2.25E-05 | 4.61E-05 |
| AC073195.1   | 0.206744 | 0.554596 | 1.423593 | 2.73E-15 | 2.30E-14 |
| FARP1-AS1    | 0.098435 | 0.21055  | 1.096922 | 0.011854 | 0.016098 |
| LINC02555    | 3.078868 | 0.907414 | -1.76257 | 8.75E-23 | 2.04E-21 |
| LINC02579    | 0.010479 | 0.026863 | 1.358081 | 4.68E-06 | 1.06E-05 |
| AC024267.5   | 0.052497 | 0.252976 | 2.268705 | 5.46E-05 | 0.000106 |
| DUXAP8       | 0.056403 | 0.383932 | 2.767    | 3.09E-12 | 1.67E-11 |
| AC073326.1   | 0.056389 | 0.213766 | 1.922551 | 0.003257 | 0.004846 |
| AC130651.1   | 0.044708 | 0.217903 | 2.285092 | 5.22E-06 | 1.17E-05 |
| AL121845.4   | 0.21594  | 0.503459 | 1.221245 | 1.32E-05 | 2.80E-05 |
| AL121917.2   | 0.133887 | 0.338516 | 1.338203 | 1.99E-05 | 4.10E-05 |
| FAM30A       | 0.20716  | 0.686697 | 1.728931 | 8.28E-10 | 3.17E-09 |
| AP005264.1   | 0.309617 | 0.088814 | -1.80162 | 1.43E-21 | 2.78E-20 |

|             |          |          |          |          |          |
|-------------|----------|----------|----------|----------|----------|
| MIR193BHG   | 0.282511 | 0.860439 | 1.606767 | 1.21E-08 | 3.96E-08 |
| AP002360.2  | 0.050517 | 0.144947 | 1.520674 | 2.39E-06 | 5.63E-06 |
| AC068831.1  | 0.056489 | 0.155282 | 1.458845 | 2.18E-17 | 2.47E-16 |
| HOXC13-AS   | 0.003469 | 0.33507  | 6.593993 | 5.20E-11 | 2.39E-10 |
| AL669970.3  | 0.129002 | 0.05904  | -1.12762 | 1.27E-11 | 6.36E-11 |
| AC007671.1  | 0.485075 | 0.136581 | -1.82845 | 5.14E-21 | 9.18E-20 |
| AC073842.1  | 0.035405 | 0.092763 | 1.389616 | 0.002258 | 0.003441 |
| AC007221.1  | 0.112047 | 0.028386 | -1.98085 | 2.28E-09 | 8.14E-09 |
| AC147651.2  | 0.07915  | 0.025373 | -1.6413  | 8.89E-08 | 2.60E-07 |
| AC015909.1  | 0.01978  | 0.129875 | 2.71499  | 5.97E-11 | 2.71E-10 |
| AL139231.1  | 0.084548 | 0.028691 | -1.5592  | 6.93E-07 | 1.77E-06 |
| AC090709.1  | 0.01247  | 0.151781 | 3.605459 | 2.65E-07 | 7.21E-07 |
| AC010976.2  | 2.284019 | 0.285992 | -2.99753 | 2.43E-28 | 1.93E-26 |
| GAS6-DT     | 1.025992 | 0.501885 | -1.03159 | 5.79E-22 | 1.16E-20 |
| AC092802.1  | 0.268526 | 0.130904 | -1.03655 | 2.00E-09 | 7.22E-09 |
| AC092168.2  | 0.048257 | 0.384655 | 2.994754 | 0.001422 | 0.002238 |
| LINC01348   | 0.107849 | 0.770724 | 2.837201 | 9.85E-17 | 1.01E-15 |
| AP000593.3  | 0.093008 | 0.356862 | 1.939935 | 4.13E-11 | 1.93E-10 |
| CYP4A22-AS1 | 0.061892 | 0.400028 | 2.692272 | 3.80E-21 | 6.95E-20 |
| LINC02206   | 0.067479 | 0.023721 | -1.5083  | 1.27E-09 | 4.71E-09 |
| LINC02474   | 0.060166 | 1.907301 | 4.986441 | 2.43E-13 | 1.51E-12 |
| AL035416.1  | 0.056036 | 0.138055 | 1.300806 | 0.015419 | 0.020557 |
| NFYC-AS1    | 0.377671 | 0.89496  | 1.244695 | 1.13E-10 | 4.91E-10 |
| AC022819.1  | 0.021872 | 0.048891 | 1.160498 | 6.58E-05 | 0.000126 |
| AL080317.2  | 0.158256 | 0.391823 | 1.307946 | 6.03E-05 | 0.000116 |
| AL512343.2  | 0.183662 | 0.508804 | 1.470058 | 7.91E-08 | 2.34E-07 |
| AC010998.1  | 0.926104 | 0.196784 | -2.23456 | 8.57E-28 | 5.49E-26 |
| LINC02365   | 0.024138 | 0.300546 | 3.638211 | 3.28E-07 | 8.77E-07 |
| AL049871.1  | 0.230135 | 0.080637 | -1.51297 | 7.45E-15 | 5.84E-14 |
| AC018682.2  | 0.023241 | 0.052592 | 1.178171 | 0.000974 | 0.001574 |
| AC245595.1  | 0.253597 | 0.530752 | 1.0655   | 0.000874 | 0.001422 |
| AC108727.1  | 0.228159 | 0.619223 | 1.44042  | 0.005568 | 0.007976 |
| AC093484.4  | 0.500153 | 1.283728 | 1.359897 | 1.00E-09 | 3.79E-09 |
| LINC00470   | 0.0157   | 0.190932 | 3.604212 | 0.021633 | 0.028272 |
| AC092143.3  | 0.099146 | 0.34189  | 1.785905 | 2.54E-10 | 1.04E-09 |
| AC091132.2  | 0.104163 | 0.269154 | 1.369593 | 5.72E-07 | 1.48E-06 |
| AC069257.1  | 0.064576 | 0.20316  | 1.653538 | 0.000149 | 0.00027  |
| AL451050.2  | 0.088629 | 0.256206 | 1.531454 | 2.81E-10 | 1.15E-09 |
| AC104809.1  | 0.238464 | 0.113177 | -1.07519 | 1.24E-07 | 3.54E-07 |
| LINC01361   | 0.009857 | 0.051329 | 2.380476 | 0.00104  | 0.001675 |
| AC027277.2  | 1.950671 | 0.610201 | -1.67661 | 6.63E-20 | 1.05E-18 |
| LINC01235   | 0.145888 | 0.328456 | 1.17084  | 2.12E-08 | 6.76E-08 |
| LINC02126   | 0.426569 | 0.203252 | -1.06951 | 6.06E-12 | 3.18E-11 |
| MCM8-AS1    | 0.020137 | 0.057938 | 1.524673 | 0.003274 | 0.004868 |

|            |          |          |          |          |          |
|------------|----------|----------|----------|----------|----------|
| AL355490.2 | 0.038679 | 0.082617 | 1.094898 | 8.67E-05 | 0.000163 |
| AL162412.1 | 0.03166  | 0.06893  | 1.122461 | 0.029359 | 0.037596 |
| AC128709.3 | 1.168588 | 0.064669 | -4.17556 | 2.17E-35 | 1.35E-32 |
| AP000526.1 | 0.003559 | 0.061554 | 4.112152 | 1.46E-10 | 6.25E-10 |
| AP4B1-AS1  | 0.193107 | 0.466028 | 1.271016 | 2.85E-07 | 7.70E-07 |
| AC117498.2 | 0.233209 | 0.653223 | 1.485953 | 1.67E-05 | 3.48E-05 |
| LINC01412  | 0.418907 | 0.099461 | -2.07442 | 2.49E-24 | 7.74E-23 |
| AP001469.2 | 0.249477 | 0.630251 | 1.33702  | 3.15E-09 | 1.10E-08 |
| AC002116.2 | 0.290285 | 0.71775  | 1.306012 | 6.63E-16 | 5.98E-15 |
| Z99289.2   | 0.013257 | 0.083953 | 2.662803 | 0.000926 | 0.0015   |
| AC073172.1 | 0.061154 | 0.021819 | -1.48685 | 8.14E-07 | 2.06E-06 |
| AC026785.3 | 0.004204 | 1.887512 | 8.810451 | 5.70E-11 | 2.59E-10 |
| LINC01010  | 0.491447 | 0.219896 | -1.16022 | 0.003665 | 0.005408 |
| AC133785.1 | 0.001372 | 0.204707 | 7.221546 | 2.40E-23 | 6.10E-22 |
| LINC01695  | 0.006129 | 0.03666  | 2.580553 | 0.029014 | 0.037184 |
| AL583810.1 | 0.094111 | 0.212164 | 1.172746 | 1.23E-05 | 2.63E-05 |
| AL132822.1 | 0.180906 | 0.66472  | 1.87751  | 0.001996 | 0.003074 |
| AC022144.1 | 0.422034 | 1.382472 | 1.71182  | 5.98E-12 | 3.14E-11 |
| LINC02065  | 0.006594 | 0.122489 | 4.215449 | 1.64E-11 | 8.14E-11 |
| AL590729.1 | 0.091605 | 0.263726 | 1.525546 | 3.95E-07 | 1.05E-06 |
| AL157904.1 | 0.051134 | 0.106775 | 1.06222  | 0.000412 | 0.000702 |
| AL035446.1 | 3.477663 | 1.453734 | -1.25835 | 9.23E-16 | 8.17E-15 |
| AC005162.2 | 0.021847 | 0.112614 | 2.365877 | 0.017011 | 0.022521 |
| LINC01700  | 0.047744 | 0.020595 | -1.21306 | 3.23E-08 | 1.01E-07 |
| AC087289.2 | 0.190779 | 0.408273 | 1.097633 | 6.75E-10 | 2.63E-09 |
| FLJ33534   | 0.018059 | 0.075758 | 2.06868  | 9.88E-14 | 6.50E-13 |
| AC023796.2 | 0.015068 | 0.267408 | 4.149446 | 1.18E-13 | 7.64E-13 |
| LINC01765  | 3.13556  | 0.548604 | -2.51489 | 2.63E-16 | 2.53E-15 |
| LINC00494  | 0.051221 | 0.131028 | 1.35506  | 0.001119 | 0.001791 |
| AC108516.2 | 0.041012 | 0.112596 | 1.457038 | 0.000143 | 0.000261 |
| AC008496.2 | 0.063785 | 1.80783  | 4.824887 | 2.69E-15 | 2.27E-14 |
| AC023855.1 | 0.022839 | 0.095277 | 2.060619 | 0.000768 | 0.001258 |
| AL080312.2 | 0.02673  | 0.093308 | 1.803527 | 0.000145 | 0.000263 |
| PGM5P4-AS1 | 0.240432 | 0.068122 | -1.81943 | 1.11E-23 | 2.99E-22 |
| PCAT19     | 6.668614 | 1.296384 | -2.36289 | 3.57E-31 | 6.72E-29 |
| AC068870.2 | 6.548311 | 2.896404 | -1.17686 | 1.13E-22 | 2.57E-21 |
| GDNF-AS1   | 0.007429 | 0.03841  | 2.370281 | 2.91E-05 | 5.84E-05 |
| LINC01090  | 0.01636  | 0.059313 | 1.858188 | 1.95E-05 | 4.02E-05 |
| AC023908.3 | 0.081372 | 0.21013  | 1.368672 | 1.38E-10 | 5.92E-10 |
| AC103923.1 | 0.025877 | 0.088763 | 1.778274 | 3.51E-08 | 1.09E-07 |
| LINC01114  | 0.013401 | 0.005201 | -1.36557 | 2.50E-08 | 7.89E-08 |
| AP000424.2 | 0.048528 | 0.307106 | 2.661835 | 3.17E-10 | 1.28E-09 |
| AL359853.1 | 0.023717 | 0.189118 | 2.995309 | 7.56E-06 | 1.66E-05 |
| AP002478.1 | 0.0265   | 0.26707  | 3.333151 | 0.003627 | 0.005356 |

|             |          |          |          |          |          |
|-------------|----------|----------|----------|----------|----------|
| AL357153.1  | 0.063657 | 0.142723 | 1.164824 | 0.000586 | 0.000982 |
| AL109945.1  | 0.012146 | 0.03679  | 1.598797 | 2.55E-05 | 5.17E-05 |
| AC027228.1  | 0.034235 | 0.185848 | 2.440579 | 0.023479 | 0.030506 |
| AC010531.5  | 0.119919 | 0.285757 | 1.25273  | 2.59E-05 | 5.24E-05 |
| AC124068.2  | 0.134923 | 0.27378  | 1.020882 | 5.24E-08 | 1.58E-07 |
| LINC00908   | 0.617497 | 0.2142   | -1.52747 | 9.03E-18 | 1.09E-16 |
| AC022217.2  | 0.232788 | 0.073771 | -1.65789 | 4.39E-10 | 1.74E-09 |
| AC010894.2  | 0.349284 | 0.843816 | 1.272527 | 9.35E-12 | 4.78E-11 |
| LINC00609   | 0.026899 | 0.237028 | 3.139462 | 0.018854 | 0.02485  |
| AC092115.3  | 0.071617 | 0.573291 | 3.000887 | 9.77E-23 | 2.27E-21 |
| AC021851.1  | 0.199294 | 0.560917 | 1.492888 | 3.81E-15 | 3.12E-14 |
| AL161668.4  | 0.076929 | 0.032211 | -1.25599 | 3.15E-11 | 1.50E-10 |
| AP002852.1  | 0.045095 | 0.118908 | 1.398808 | 7.72E-06 | 1.70E-05 |
| AC084859.1  | 0.325422 | 0.721513 | 1.148714 | 0.000102 | 0.00019  |
| AC106712.1  | 0.020246 | 0.087106 | 2.105158 | 0.000172 | 0.000309 |
| AL163952.1  | 0.01581  | 0.070023 | 2.146983 | 2.29E-05 | 4.67E-05 |
| AP001619.2  | 0.012618 | 0.088834 | 2.81568  | 1.03E-08 | 3.41E-08 |
| CYTOR       | 1.740607 | 4.547679 | 1.38554  | 1.51E-20 | 2.53E-19 |
| AC108868.1  | 0.204364 | 0.054519 | -1.9063  | 2.04E-18 | 2.68E-17 |
| AL139353.2  | 0.166398 | 0.342516 | 1.041536 | 8.58E-07 | 2.17E-06 |
| AL590705.3  | 0.525508 | 1.494421 | 1.507803 | 7.25E-06 | 1.60E-05 |
| DLG3-AS1    | 0.118679 | 0.379225 | 1.675988 | 6.90E-14 | 4.65E-13 |
| AC022960.2  | 0.030396 | 0.223564 | 2.878748 | 0.009983 | 0.013737 |
| AC002519.1  | 0.019937 | 0.057265 | 1.522226 | 0.000351 | 0.000603 |
| AC008149.1  | 0.046461 | 0.170107 | 1.872362 | 0.016771 | 0.022246 |
| AC015813.1  | 1.157419 | 2.661786 | 1.201484 | 8.88E-06 | 1.93E-05 |
| AC079630.1  | 12.20104 | 3.61905  | -1.75332 | 1.05E-23 | 2.85E-22 |
| AC061992.1  | 0.476478 | 1.312203 | 1.46151  | 3.57E-11 | 1.68E-10 |
| AL355574.1  | 1.070581 | 2.209734 | 1.045479 | 9.61E-14 | 6.33E-13 |
| LINC01612   | 2.369043 | 1.059123 | -1.16143 | 8.40E-18 | 1.02E-16 |
| LINC01303   | 0.019346 | 0.123288 | 2.671917 | 2.45E-16 | 2.36E-15 |
| SAMMSON     | 0.003896 | 0.041118 | 3.399829 | 5.03E-08 | 1.53E-07 |
| AL121759.1  | 0.010195 | 0.060736 | 2.574751 | 0.012108 | 0.016424 |
| SLC7A11-AS1 | 0.029073 | 0.11548  | 1.989896 | 9.92E-05 | 0.000185 |
| AC079834.2  | 0.128955 | 0.470947 | 1.868702 | 2.60E-15 | 2.19E-14 |
| AC138474.1  | 0.133523 | 0.059703 | -1.16121 | 1.05E-22 | 2.41E-21 |
| VPS33B-DT   | 0.033933 | 0.068087 | 1.004697 | 2.42E-06 | 5.71E-06 |
| AC087588.2  | 0.0763   | 0.308349 | 2.014815 | 6.43E-06 | 1.43E-05 |
| LINC01513   | 1.032521 | 0.279106 | -1.88729 | 3.10E-13 | 1.90E-12 |
| AC005865.1  | 0.014977 | 0.140218 | 3.226842 | 2.75E-15 | 2.31E-14 |
| AL139424.1  | 0.013227 | 0.04628  | 1.806929 | 0.000876 | 0.001424 |
| AC005695.3  | 0.086122 | 0.18861  | 1.130951 | 0.000615 | 0.001024 |
| AC104248.1  | 0.037859 | 0.303543 | 3.003212 | 5.43E-15 | 4.35E-14 |
| C5orf66     | 0.087198 | 0.175114 | 1.005922 | 1.11E-09 | 4.17E-09 |

|            |          |          |          |          |          |
|------------|----------|----------|----------|----------|----------|
| AC022431.1 | 0.052467 | 0.021691 | -1.27433 | 5.55E-06 | 1.24E-05 |
| AC079354.3 | 0.021695 | 0.122923 | 2.502299 | 1.85E-09 | 6.72E-09 |
| AC024257.1 | 0.509907 | 0.14286  | -1.83563 | 9.26E-23 | 2.16E-21 |
| AC027449.1 | 0.329896 | 0.158481 | -1.0577  | 6.26E-13 | 3.71E-12 |
| CLLU1      | 0.002169 | 0.008536 | 1.976521 | 0.008109 | 0.011327 |
| AC243830.2 | 0.074608 | 0.282168 | 1.919154 | 2.26E-10 | 9.35E-10 |
| NAV2-AS2   | 0.935264 | 0.183481 | -2.34974 | 1.10E-15 | 9.61E-15 |
| HOXA11-AS  | 0.005324 | 0.143449 | 4.75175  | 3.37E-08 | 1.05E-07 |
| LINC02012  | 0.081586 | 0.247728 | 1.60237  | 1.94E-08 | 6.22E-08 |
| AC010275.1 | 0.008744 | 0.394492 | 5.495602 | 3.18E-09 | 1.11E-08 |
| PRMT5-AS1  | 0.050373 | 0.134129 | 1.412905 | 1.57E-12 | 8.89E-12 |
| AL163953.1 | 0.002467 | 0.201102 | 6.34912  | 7.55E-17 | 7.94E-16 |
| CASC8      | 0.044205 | 0.43524  | 3.299545 | 5.51E-11 | 2.51E-10 |
| AP000695.2 | 0.158433 | 0.533113 | 1.750568 | 2.97E-10 | 1.21E-09 |
| AC092809.2 | 0.602311 | 0.298596 | -1.01232 | 1.29E-16 | 1.30E-15 |
| LINC01645  | 1.000352 | 0.174333 | -2.52059 | 1.07E-27 | 6.75E-26 |
| AL356234.2 | 0.017272 | 0.487126 | 4.817755 | 8.42E-10 | 3.21E-09 |
| AL391832.1 | 0.038711 | 0.083199 | 1.103816 | 0.002832 | 0.004251 |
| LINC01564  | 0.174367 | 1.426612 | 3.032391 | 3.19E-10 | 1.29E-09 |
| AC007663.4 | 0.236978 | 0.527689 | 1.154938 | 7.46E-11 | 3.33E-10 |
| AC073115.1 | 0.050315 | 0.173627 | 1.786924 | 4.90E-05 | 9.58E-05 |
| IDH1-AS1   | 0.355999 | 0.76755  | 1.108389 | 4.56E-09 | 1.57E-08 |
| AL033397.1 | 0.035207 | 1.804618 | 5.679708 | 6.44E-07 | 1.65E-06 |
| AL353803.1 | 0.006153 | 0.04496  | 2.869371 | 8.42E-07 | 2.13E-06 |
| AC073257.2 | 0.229914 | 0.520445 | 1.17865  | 0.000494 | 0.000834 |
| AL049651.2 | 0.196308 | 0.011579 | -4.0836  | 2.42E-39 | 7.51E-36 |
| AL359922.2 | 0.075829 | 0.388054 | 2.355441 | 1.30E-08 | 4.24E-08 |
| AL353708.3 | 0.117916 | 0.411082 | 1.801667 | 2.99E-17 | 3.31E-16 |
| AC020612.3 | 0.075133 | 0.243425 | 1.695951 | 2.84E-06 | 6.62E-06 |
| LINC02571  | 0.057681 | 0.203663 | 1.820011 | 0.024674 | 0.031924 |
| LINC01121  | 0.026591 | 0.085313 | 1.681837 | 1.42E-05 | 3.01E-05 |
| AL390115.1 | 0.01799  | 0.107882 | 2.584212 | 1.32E-09 | 4.91E-09 |
| FOCAD-AS1  | 0.061698 | 0.172495 | 1.48327  | 0.000165 | 0.000296 |
| AC010175.1 | 0.710394 | 0.319509 | -1.15276 | 3.54E-15 | 2.93E-14 |
| NARF-IT1   | 0.366314 | 0.832226 | 1.183894 | 1.90E-06 | 4.60E-06 |
| AC114947.2 | 0.51103  | 0.170758 | -1.58146 | 4.01E-25 | 1.45E-23 |
| AC003005.2 | 0.019123 | 0.07029  | 1.878002 | 0.00142  | 0.002236 |
| AC004034.1 | 0.123742 | 0.806212 | 2.703819 | 1.06E-13 | 6.95E-13 |
| AC008870.4 | 0.071086 | 0.197346 | 1.473096 | 6.22E-10 | 2.43E-09 |
| AC084757.2 | 0.030571 | 0.086074 | 1.493435 | 0.002933 | 0.004396 |
| AC022613.2 | 0.877448 | 0.325155 | -1.43219 | 9.79E-28 | 6.21E-26 |
| AC025575.2 | 0.044278 | 1.715006 | 5.275487 | 1.09E-05 | 2.34E-05 |
| AC100802.1 | 0.028791 | 0.010672 | -1.43181 | 7.68E-14 | 5.13E-13 |
| LINC01936  | 4.803697 | 0.971281 | -2.30618 | 1.56E-26 | 7.54E-25 |

|              |          |          |          |          |          |
|--------------|----------|----------|----------|----------|----------|
| AC037487.4   | 0.037906 | 0.121453 | 1.679918 | 1.06E-07 | 3.07E-07 |
| Z69666.1     | 0.09272  | 0.226052 | 1.2857   | 0.001007 | 0.001625 |
| AC105219.3   | 0.09876  | 0.744814 | 2.91488  | 9.78E-26 | 4.14E-24 |
| LINC01624    | 0.116142 | 0.025952 | -2.16197 | 5.80E-27 | 3.06E-25 |
| LINC02300    | 0.115842 | 0.784194 | 2.759047 | 0.025201 | 0.032565 |
| AC092295.1   | 0.016336 | 0.065958 | 2.0135   | 4.86E-06 | 1.10E-05 |
| AC010327.4   | 0.064476 | 0.167564 | 1.377866 | 3.72E-06 | 8.52E-06 |
| AC005586.2   | 0.207104 | 0.521728 | 1.332943 | 0.003062 | 0.004574 |
| AL136221.1   | 0.061989 | 0.405241 | 2.708694 | 7.65E-14 | 5.12E-13 |
| SAMD12-AS1   | 0.270864 | 0.75383  | 1.476669 | 2.06E-15 | 1.75E-14 |
| AP001189.5   | 0.203854 | 0.046766 | -2.124   | 2.55E-23 | 6.35E-22 |
| AC093326.1   | 0.075816 | 0.036678 | -1.04758 | 7.21E-14 | 4.86E-13 |
| AC145146.1   | 0.030046 | 0.345812 | 3.524758 | 8.30E-08 | 2.44E-07 |
| C21orf91-OT1 | 0.013306 | 0.130967 | 3.299099 | 0.000619 | 0.00103  |
| AL391056.1   | 0.067627 | 1.423011 | 4.395203 | 2.34E-25 | 9.16E-24 |
| AC004895.1   | 0.031618 | 0.091997 | 1.54086  | 3.95E-08 | 1.22E-07 |
| AL354714.3   | 1.068737 | 0.152262 | -2.81128 | 1.11E-32 | 3.58E-30 |
| SNHG25       | 0.744137 | 2.328596 | 1.64582  | 7.21E-14 | 4.86E-13 |
| AP002812.3   | 0.130758 | 0.289207 | 1.145204 | 0.003922 | 0.00576  |
| AC084346.2   | 0.02221  | 0.108169 | 2.283994 | 4.92E-10 | 1.94E-09 |
| HAGLROS      | 0.128014 | 0.805582 | 2.653735 | 2.64E-10 | 1.08E-09 |
| AC069222.1   | 0.021986 | 0.083304 | 1.921776 | 7.30E-13 | 4.30E-12 |
| AC005841.1   | 0.039469 | 0.163394 | 2.049556 | 1.48E-07 | 4.18E-07 |
| LINC02208    | 0.001547 | 0.024873 | 4.006784 | 7.57E-08 | 2.24E-07 |
| AC012645.4   | 0.118726 | 0.337219 | 1.506048 | 1.84E-09 | 6.68E-09 |
| AC025431.1   | 0.09166  | 0.024036 | -1.93109 | 1.65E-19 | 2.47E-18 |
| AC137932.2   | 0.106823 | 0.401323 | 1.909543 | 4.87E-08 | 1.48E-07 |
| AC021087.2   | 0.075085 | 0.301258 | 2.004403 | 1.88E-17 | 2.16E-16 |
| AC099850.1   | 0.947164 | 0.466694 | -1.02114 | 4.42E-19 | 6.41E-18 |
| AC008649.1   | 0.040749 | 0.247666 | 2.603571 | 2.44E-05 | 4.95E-05 |
| AC021546.1   | 0.05519  | 0.024088 | -1.19607 | 1.12E-08 | 3.69E-08 |
| ITGB1-DT     | 0.044163 | 0.597739 | 3.758591 | 6.47E-16 | 5.87E-15 |
| AL139819.1   | 0.118438 | 0.04371  | -1.4381  | 0.000215 | 0.00038  |
| MIR4713HG    | 0.012239 | 0.303804 | 4.633574 | 1.92E-10 | 8.03E-10 |
| AC020931.1   | 0.087022 | 0.174716 | 1.005562 | 6.64E-05 | 0.000127 |
| AC004832.1   | 1.192209 | 0.270801 | -2.13833 | 3.48E-14 | 2.48E-13 |
| BX664727.3   | 0.124467 | 0.043349 | -1.52169 | 2.78E-14 | 2.01E-13 |
| TMEM92-AS1   | 0.454809 | 1.448647 | 1.671373 | 5.19E-13 | 3.10E-12 |
| AC004241.4   | 0.033869 | 0.076023 | 1.166476 | 0.021217 | 0.027781 |
| AL035409.1   | 1.665258 | 0.383768 | -2.11744 | 4.12E-26 | 1.91E-24 |
| AC104134.1   | 0.012584 | 0.043895 | 1.802424 | 2.18E-06 | 5.17E-06 |
| AL031770.1   | 0.039085 | 0.194928 | 2.318259 | 0.002095 | 0.003211 |
| AL365199.1   | 0.090341 | 0.022342 | -2.01561 | 4.79E-20 | 7.71E-19 |
| AL078644.1   | 0.217333 | 0.551628 | 1.34379  | 2.39E-17 | 2.69E-16 |

|            |          |          |          |          |          |
|------------|----------|----------|----------|----------|----------|
| LINC01502  | 0.013672 | 0.103995 | 2.927188 | 0.008423 | 0.01172  |
| AC004223.2 | 0.062919 | 0.254096 | 2.013793 | 0.004991 | 0.007206 |
| AC007285.1 | 0.099808 | 0.37883  | 1.92433  | 8.02E-19 | 1.12E-17 |
| AL032819.1 | 0.036055 | 0.16282  | 2.175029 | 1.81E-07 | 5.02E-07 |
| AL121672.3 | 0.107375 | 0.237344 | 1.144326 | 0.000107 | 0.000198 |
| AC087627.1 | 0.026832 | 0.065843 | 1.295057 | 1.29E-05 | 2.75E-05 |
| AC069200.1 | 0.46227  | 1.477701 | 1.676545 | 2.88E-08 | 9.03E-08 |
| AL606469.1 | 4.329132 | 0.128163 | -5.07803 | 2.32E-33 | 9.60E-31 |
| AL390719.2 | 0.876383 | 2.979791 | 1.765578 | 1.56E-10 | 6.64E-10 |
| MNX1-AS1   | 0.041135 | 1.722938 | 5.388372 | 1.56E-26 | 7.54E-25 |
| AC068700.1 | 0.332776 | 0.075623 | -2.13764 | 5.47E-28 | 3.74E-26 |
| AL138733.1 | 0.014724 | 0.066591 | 2.177137 | 3.87E-05 | 7.64E-05 |
| AL355340.1 | 0.023695 | 0.071331 | 1.589954 | 0.000148 | 0.000268 |
| AL160314.2 | 0.060618 | 0.153632 | 1.341669 | 1.18E-08 | 3.87E-08 |
| AC026369.3 | 8.838213 | 0.920836 | -3.26274 | 1.20E-29 | 1.24E-27 |
| AC006159.1 | 0.410879 | 0.158921 | -1.3704  | 1.08E-17 | 1.29E-16 |
| LINC01176  | 0.892056 | 1.926244 | 1.110584 | 9.33E-09 | 3.10E-08 |
| AC106900.2 | 0.032102 | 0.922747 | 4.845209 | 1.68E-14 | 1.24E-13 |
| AL451060.1 | 0.409453 | 0.86065  | 1.071731 | 0.00083  | 0.001355 |
| AC010624.3 | 0.363222 | 0.149727 | -1.27852 | 6.27E-07 | 1.61E-06 |
| AC141002.1 | 0.288005 | 0.622556 | 1.11211  | 9.35E-07 | 2.35E-06 |
| C11orf72   | 0.018568 | 0.058711 | 1.660805 | 2.65E-09 | 9.40E-09 |
| AC025470.2 | 0.142728 | 0.029012 | -2.29855 | 2.43E-17 | 2.73E-16 |
| Z98257.1   | 0.061727 | 4.77663  | 6.273938 | 4.98E-24 | 1.47E-22 |
| AC006159.2 | 0.161735 | 0.041503 | -1.96235 | 6.73E-15 | 5.33E-14 |
| MIR4527HG  | 0.00812  | 0.113929 | 3.810584 | 0.00026  | 0.000455 |
| AC135012.3 | 0.405148 | 0.024849 | -4.02717 | 9.42E-32 | 2.25E-29 |
| DLEU2      | 0.507964 | 1.20014  | 1.240405 | 3.22E-11 | 1.53E-10 |
| AC009041.2 | 0.201591 | 0.47168  | 1.226379 | 0.018574 | 0.024491 |
| DNMBP-AS1  | 0.299519 | 0.63724  | 1.089192 | 1.52E-11 | 7.56E-11 |
| AC004947.1 | 0.708718 | 0.094813 | -2.90205 | 3.72E-27 | 2.08E-25 |
| LINC01585  | 0.029681 | 0.07017  | 1.241287 | 3.94E-06 | 9.01E-06 |
| CSTF3-DT   | 0.019936 | 0.05313  | 1.414141 | 1.40E-06 | 3.42E-06 |
| LINC01070  | 0.045447 | 0.004058 | -3.48519 | 4.17E-37 | 3.70E-34 |
| AL008723.3 | 0.093359 | 0.276641 | 1.567146 | 0.002376 | 0.003612 |
| AC009974.1 | 0.957167 | 0.444102 | -1.10788 | 5.19E-15 | 4.17E-14 |
| AL390860.1 | 0.014618 | 0.006976 | -1.06731 | 3.23E-05 | 6.42E-05 |
| PARAL1     | 5.862907 | 0.793397 | -2.8855  | 7.45E-29 | 6.81E-27 |
| AL590560.1 | 0.893112 | 2.151211 | 1.268237 | 0.0003   | 0.000521 |
| AC092484.1 | 0.009283 | 0.45563  | 5.6171   | 1.43E-10 | 6.14E-10 |
| AF230666.1 | 0.138472 | 0.341163 | 1.300863 | 8.52E-10 | 3.25E-09 |
| AL353801.2 | 0.01405  | 0.063853 | 2.184163 | 0.016937 | 0.022437 |
| AL136115.2 | 0.162426 | 0.684552 | 2.075377 | 0.000448 | 0.00076  |
| AC113139.1 | 0.218608 | 0.617824 | 1.49885  | 1.27E-08 | 4.16E-08 |

|             |          |          |          |          |          |
|-------------|----------|----------|----------|----------|----------|
| LINC01138   | 0.456288 | 1.173869 | 1.363255 | 2.49E-14 | 1.81E-13 |
| LINC01727   | 0.010607 | 0.038217 | 1.849246 | 1.22E-07 | 3.48E-07 |
| AC005730.3  | 0.096708 | 0.369868 | 1.935302 | 4.08E-06 | 9.32E-06 |
| AC093788.1  | 0.295118 | 0.837084 | 1.504081 | 5.75E-10 | 2.25E-09 |
| AC109361.1  | 0.013817 | 0.033085 | 1.259723 | 0.000158 | 0.000286 |
| LINC00944   | 0.111465 | 0.453874 | 2.025701 | 6.75E-09 | 2.29E-08 |
| AL590491.2  | 0.320967 | 0.067515 | -2.24913 | 1.09E-14 | 8.28E-14 |
| MRGPRF-AS1  | 0.068014 | 0.02671  | -1.34843 | 1.57E-13 | 1.00E-12 |
| AL357140.2  | 0.268334 | 0.540034 | 1.009019 | 8.86E-10 | 3.37E-09 |
| AC105384.1  | 0.415591 | 0.108627 | -1.93578 | 9.13E-22 | 1.80E-20 |
| AL390036.1  | 0.893736 | 0.237387 | -1.91261 | 1.28E-22 | 2.88E-21 |
| LINC01970   | 0.03058  | 0.141445 | 2.20959  | 1.88E-15 | 1.61E-14 |
| AC027801.3  | 0.021808 | 0.115137 | 2.400397 | 5.04E-05 | 9.83E-05 |
| LINC01132   | 0.200419 | 0.457354 | 1.190294 | 3.58E-07 | 9.55E-07 |
| SYNGAP1-AS1 | 0.029322 | 0.09706  | 1.726901 | 5.12E-10 | 2.01E-09 |
| AC104051.2  | 0.029694 | 0.011751 | -1.33733 | 7.85E-15 | 6.10E-14 |
| LINC01655   | 0.441492 | 2.123952 | 2.266291 | 1.00E-05 | 2.17E-05 |
| AL121894.1  | 0.074158 | 0.017078 | -2.1185  | 1.12E-15 | 9.80E-15 |
| AC005083.1  | 2.26421  | 5.382653 | 1.24931  | 1.27E-08 | 4.18E-08 |
| AC091488.1  | 0.093695 | 0.270646 | 1.53036  | 5.50E-09 | 1.88E-08 |
| LINC01993   | 0.024497 | 0.209388 | 3.095507 | 2.03E-15 | 1.72E-14 |
| AC092920.1  | 0.002601 | 0.083646 | 5.007364 | 3.38E-12 | 1.83E-11 |
| AC239798.4  | 0.078136 | 0.159549 | 1.029936 | 0.008213 | 0.011457 |
| LINC01600   | 0.007813 | 0.037838 | 2.275792 | 1.70E-09 | 6.21E-09 |
| AC106052.1  | 0.051086 | 0.143246 | 1.487492 | 2.72E-07 | 7.37E-07 |
| AC007497.1  | 0.117292 | 0.335353 | 1.51558  | 3.82E-08 | 1.18E-07 |
| HHIP-AS1    | 6.338976 | 2.313574 | -1.45413 | 2.19E-20 | 3.61E-19 |
| AC092683.1  | 0.033242 | 0.077722 | 1.225322 | 1.82E-06 | 4.40E-06 |
| AC021092.1  | 0.020282 | 0.059155 | 1.54429  | 6.65E-09 | 2.26E-08 |
| LINC02340   | 0.104643 | 0.21024  | 1.006563 | 7.92E-06 | 1.74E-05 |
| AC097641.2  | 0.28111  | 0.735325 | 1.387249 | 2.68E-11 | 1.29E-10 |
| AL136038.3  | 0.042975 | 0.088357 | 1.03984  | 5.25E-05 | 0.000102 |
| AC024267.4  | 0.053463 | 0.226797 | 2.084791 | 0.000346 | 0.000596 |
| AC132219.1  | 0.039927 | 0.110522 | 1.468912 | 0.008067 | 0.01128  |
| SAMSN1-AS1  | 0.016522 | 0.189492 | 3.519653 | 2.05E-07 | 5.65E-07 |
| AC254629.1  | 0.005926 | 0.121317 | 4.355583 | 2.94E-13 | 1.81E-12 |
| MYHAS       | 0.009805 | 0.033495 | 1.772381 | 1.63E-05 | 3.40E-05 |
| AC091132.1  | 0.026277 | 0.068722 | 1.386988 | 0.0044   | 0.006402 |
| LINC01738   | 0.11158  | 0.011702 | -3.25324 | 1.66E-23 | 4.35E-22 |
| AC091729.3  | 1.095668 | 2.51859  | 1.200806 | 1.51E-15 | 1.31E-14 |
| AL021707.4  | 0.263774 | 0.653934 | 1.30984  | 2.23E-07 | 6.11E-07 |
| EGOT        | 0.083127 | 0.585898 | 2.817255 | 2.20E-08 | 7.02E-08 |
| LINC00622   | 0.65359  | 0.299062 | -1.12794 | 1.20E-16 | 1.22E-15 |
| AC092171.4  | 0.171464 | 0.701392 | 2.032312 | 1.39E-16 | 1.40E-15 |



|            |          |          |          |          |          |
|------------|----------|----------|----------|----------|----------|
| LINC01775  | 0.02869  | 0.177928 | 2.632661 | 1.72E-13 | 1.10E-12 |
| LINC01929  | 0.083093 | 0.322017 | 1.954336 | 0.00018  | 0.000322 |
| AL033528.2 | 0.014586 | 0.033502 | 1.199628 | 0.000116 | 0.000214 |
| AL356272.1 | 0.01694  | 0.049992 | 1.561231 | 0.035798 | 0.045171 |
| LINC01460  | 0.028251 | 0.510853 | 4.176551 | 1.37E-19 | 2.07E-18 |
| AC010655.2 | 0.108033 | 0.266743 | 1.303982 | 1.15E-05 | 2.46E-05 |
| AC055854.1 | 0.133196 | 0.058123 | -1.19637 | 7.57E-15 | 5.92E-14 |
| CR936218.1 | 0.722647 | 1.556274 | 1.106732 | 0.00112  | 0.001792 |
| MBNL1-AS1  | 1.593753 | 0.518785 | -1.61922 | 3.18E-28 | 2.35E-26 |
| PRKCA-AS1  | 0.004477 | 0.224561 | 5.648397 | 0.014898 | 0.019936 |
| AP003419.2 | 0.163592 | 0.368195 | 1.170368 | 0.008696 | 0.012086 |
| AC018755.4 | 3.649522 | 1.26623  | -1.52717 | 6.04E-22 | 1.20E-20 |
| AC016027.2 | 0.005863 | 0.031282 | 2.415657 | 0.000673 | 0.001111 |
| LINC01354  | 0.326187 | 0.10495  | -1.636   | 2.67E-25 | 1.02E-23 |
| AC119424.1 | 1.296608 | 0.149216 | -3.11926 | 4.25E-22 | 8.78E-21 |
| Z85994.1   | 0.006734 | 0.116856 | 4.117231 | 7.84E-10 | 3.02E-09 |
| AC022509.4 | 0.171487 | 0.053338 | -1.68485 | 9.49E-10 | 3.59E-09 |
| PRC1-AS1   | 0.03901  | 0.129896 | 1.735429 | 8.00E-12 | 4.14E-11 |
| AC064807.2 | 0.03455  | 0.181559 | 2.393681 | 1.01E-07 | 2.93E-07 |
| AL135787.1 | 0.027162 | 0.190397 | 2.809356 | 6.58E-06 | 1.46E-05 |
| AP002761.3 | 0.694973 | 0.288532 | -1.26822 | 4.34E-24 | 1.30E-22 |
| AC009065.2 | 0.225695 | 3.059685 | 3.760933 | 1.36E-22 | 3.05E-21 |
| AP001160.4 | 0.361221 | 0.822461 | 1.187064 | 0.000106 | 0.000197 |
| AC011603.2 | 0.042519 | 0.086787 | 1.029387 | 6.46E-05 | 0.000124 |
| HOXC-AS3   | 0.001954 | 0.165701 | 6.405927 | 7.25E-08 | 2.15E-07 |
| AC254562.2 | 0.02934  | 0.065028 | 1.148187 | 0.003737 | 0.005501 |
| AL133243.1 | 0.053916 | 0.220015 | 2.028824 | 0.000656 | 0.001087 |
| AL353804.2 | 0.153508 | 0.674826 | 2.136204 | 0.004432 | 0.006445 |
| AC027601.3 | 0.178512 | 0.603058 | 1.756275 | 3.97E-12 | 2.13E-11 |
| AC022398.1 | 0.059874 | 0.165456 | 1.466446 | 0.004125 | 0.006035 |
| AC025031.4 | 0.033874 | 0.300372 | 3.148481 | 1.93E-16 | 1.89E-15 |
| AP000439.3 | 0.008676 | 0.036335 | 2.066244 | 0.004326 | 0.006301 |
| AC104958.2 | 1.257768 | 4.219102 | 1.74607  | 9.11E-07 | 2.29E-06 |
| AP005432.1 | 0.014645 | 0.08778  | 2.583433 | 0.009488 | 0.013111 |
| LINC02398  | 0.045593 | 0.673356 | 3.884494 | 1.69E-08 | 5.44E-08 |
| EDNRB-AS1  | 0.013014 | 0.058035 | 2.156852 | 0.000627 | 0.001042 |
| LINC01473  | 0.17896  | 0.390471 | 1.125581 | 8.19E-05 | 0.000155 |
| AF038458.2 | 0.026578 | 0.057387 | 1.11051  | 0.007512 | 0.010556 |
| LINC00942  | 0.038718 | 4.061868 | 6.712979 | 8.86E-21 | 1.53E-19 |
| AC022784.5 | 0.168319 | 0.535049 | 1.668475 | 5.01E-12 | 2.65E-11 |
| MYOSLID    | 0.13775  | 1.578689 | 3.518607 | 3.07E-21 | 5.73E-20 |
| AC024361.2 | 0.08935  | 0.196245 | 1.135116 | 4.68E-07 | 1.23E-06 |
| AC013731.1 | 0.088577 | 0.478859 | 2.434598 | 5.69E-20 | 9.14E-19 |
| EHMT2-AS1  | 0.053598 | 0.184047 | 1.779833 | 7.28E-09 | 2.46E-08 |

|             |          |          |          |          |          |
|-------------|----------|----------|----------|----------|----------|
| AC244205.1  | 0.091155 | 0.426148 | 2.224965 | 3.63E-10 | 1.45E-09 |
| ZNF346-IT1  | 0.200977 | 0.43626  | 1.118163 | 0.000657 | 0.001088 |
| AL133346.1  | 0.260527 | 0.124662 | -1.06341 | 9.82E-10 | 3.71E-09 |
| AC008752.1  | 0.040887 | 0.088183 | 1.108845 | 0.000734 | 0.001205 |
| AC012213.3  | 0.108187 | 0.324679 | 1.585487 | 1.45E-08 | 4.70E-08 |
| LINC01352   | 0.902788 | 0.189448 | -2.25258 | 1.45E-26 | 7.16E-25 |
| AC006273.1  | 1.069522 | 0.1904   | -2.48986 | 5.06E-29 | 4.84E-27 |
| MEG3        | 0.613015 | 2.580373 | 2.073586 | 0.009629 | 0.013291 |
| AC107909.2  | 0.021874 | 0.159964 | 2.870477 | 7.27E-05 | 0.000138 |
| AC084816.1  | 0.001647 | 0.026268 | 3.995379 | 1.92E-06 | 4.63E-06 |
| AL358334.3  | 0.055269 | 0.135044 | 1.288904 | 6.82E-05 | 0.00013  |
| AC010547.2  | 0.086097 | 0.494492 | 2.521915 | 0.000175 | 0.000313 |
| LANCL1-AS1  | 3.83613  | 0.373828 | -3.3592  | 1.23E-31 | 2.72E-29 |
| MIR22HG     | 19.22886 | 6.667804 | -1.52799 | 2.53E-28 | 1.99E-26 |
| AL391244.3  | 0.502701 | 1.755558 | 1.804157 | 3.95E-24 | 1.21E-22 |
| AC022098.2  | 0.18497  | 1.392533 | 2.91235  | 2.85E-07 | 7.70E-07 |
| SNHG17      | 2.457714 | 5.356457 | 1.123962 | 1.65E-16 | 1.63E-15 |
| C10orf91    | 0.069476 | 0.347798 | 2.32367  | 2.88E-13 | 1.78E-12 |
| LINC01096   | 0.007704 | 0.064795 | 3.072274 | 0.000231 | 0.000408 |
| AC027601.2  | 0.723801 | 0.20454  | -1.82321 | 2.50E-23 | 6.30E-22 |
| AC009237.14 | 1.647207 | 4.454622 | 1.435281 | 1.29E-23 | 3.42E-22 |
| FLJ45513    | 0.314024 | 1.106196 | 1.816659 | 2.39E-10 | 9.87E-10 |
| AC027514.2  | 0.160508 | 0.399171 | 1.31436  | 0.008384 | 0.011671 |
| AP003119.2  | 0.227453 | 0.936792 | 2.042159 | 3.29E-12 | 1.78E-11 |
| EP300-AS1   | 4.042441 | 1.362172 | -1.56932 | 2.65E-25 | 1.02E-23 |
| AC100778.3  | 0.071657 | 0.145825 | 1.025058 | 5.27E-05 | 0.000102 |
| AL157373.2  | 0.10737  | 0.507149 | 2.239817 | 1.48E-07 | 4.18E-07 |
| AP003559.1  | 0.036575 | 0.485821 | 3.731482 | 1.03E-23 | 2.80E-22 |
| AP003472.1  | 0.025652 | 0.165448 | 2.689223 | 8.15E-10 | 3.12E-09 |
| AC012073.1  | 0.458314 | 1.266735 | 1.466708 | 1.19E-18 | 1.61E-17 |
| HSPC324     | 6.405087 | 0.507818 | -3.65683 | 2.68E-31 | 5.27E-29 |
| LINC01267   | 0.407858 | 0.134156 | -1.60416 | 3.42E-06 | 7.85E-06 |
| AC139720.1  | 0.062368 | 0.239855 | 1.943292 | 7.18E-05 | 0.000137 |
| AC011921.1  | 0.148957 | 0.375174 | 1.332665 | 1.35E-10 | 5.81E-10 |
| AC138356.1  | 0.174659 | 0.085048 | -1.03819 | 4.11E-21 | 7.49E-20 |
| PVT1        | 0.412965 | 3.060577 | 2.889712 | 3.73E-30 | 4.52E-28 |
| LINC00626   | 0.006962 | 0.121917 | 4.130215 | 1.86E-12 | 1.05E-11 |
| AC034229.4  | 0.133906 | 0.462481 | 1.788175 | 2.26E-08 | 7.18E-08 |
| AL117328.2  | 0.00484  | 0.017423 | 1.847986 | 2.08E-05 | 4.27E-05 |
| AC015849.5  | 0.007655 | 0.111058 | 3.858764 | 3.74E-23 | 9.24E-22 |
| AL031848.1  | 0.054789 | 0.171922 | 1.649787 | 3.32E-06 | 7.66E-06 |
| AC027243.1  | 0.007586 | 0.05942  | 2.969543 | 5.22E-07 | 1.36E-06 |
| AC005856.1  | 1.553548 | 0.529211 | -1.55365 | 2.21E-25 | 8.79E-24 |
| AL162632.1  | 0.022736 | 0.059828 | 1.395857 | 0.000172 | 0.000309 |

|            |          |          |          |          |          |
|------------|----------|----------|----------|----------|----------|
| AL135786.2 | 0.15817  | 0.058332 | -1.43911 | 8.31E-17 | 8.68E-16 |
| FLJ12825   | 0.022715 | 0.104177 | 2.197328 | 2.47E-11 | 1.20E-10 |
| AL662860.1 | 0.351725 | 0.131852 | -1.41553 | 5.59E-07 | 1.45E-06 |
| AC253576.2 | 0.290266 | 0.906854 | 1.643493 | 2.21E-06 | 5.24E-06 |
| LINC01105  | 0.172142 | 0.068225 | -1.33523 | 8.70E-18 | 1.05E-16 |
| AC084048.1 | 0.02719  | 0.094433 | 1.796207 | 6.68E-07 | 1.71E-06 |
| AC090912.3 | 0.053618 | 0.145501 | 1.440238 | 0.00666  | 0.009427 |
| AC007342.5 | 0.318582 | 1.097272 | 1.784185 | 2.98E-14 | 2.14E-13 |
| AC079921.1 | 0.174297 | 0.423521 | 1.280889 | 9.10E-06 | 1.98E-05 |
| CERNA3     | 0.010956 | 0.070003 | 2.67575  | 6.08E-08 | 1.82E-07 |
| AL022313.2 | 0.110438 | 0.879089 | 2.992774 | 1.52E-05 | 3.19E-05 |
| AC020594.1 | 0.25725  | 0.648358 | 1.333619 | 1.44E-08 | 4.68E-08 |
| AL590006.1 | 0.027042 | 0.211075 | 2.964488 | 1.25E-06 | 3.09E-06 |
| LINC01948  | 0.146152 | 0.337587 | 1.20779  | 1.42E-05 | 3.00E-05 |
| AC116407.1 | 5.224849 | 1.452359 | -1.84699 | 5.11E-27 | 2.74E-25 |
| AC016737.2 | 0.057658 | 0.179787 | 1.64069  | 0.001243 | 0.001977 |
| AC131009.3 | 0.601984 | 1.668518 | 1.470769 | 1.97E-16 | 1.93E-15 |
| LINP1      | 0.073101 | 1.345486 | 4.202093 | 3.89E-07 | 1.03E-06 |
| AC009704.2 | 0.14699  | 0.459724 | 1.645045 | 1.14E-05 | 2.45E-05 |
| LINC00582  | 0.142651 | 0.610775 | 2.098151 | 5.45E-11 | 2.49E-10 |
| AC010327.3 | 0.008407 | 0.036866 | 2.132578 | 2.51E-05 | 5.10E-05 |
| AC108676.1 | 0.034479 | 0.26292  | 2.930813 | 1.38E-12 | 7.84E-12 |
| AC007879.4 | 0.052354 | 0.176865 | 1.756263 | 2.70E-07 | 7.34E-07 |
| AL031058.1 | 0.415543 | 1.949259 | 2.229855 | 8.72E-17 | 9.05E-16 |
| AP000844.2 | 0.122541 | 0.438331 | 1.838752 | 0.024197 | 0.031367 |
| AC245123.1 | 0.019416 | 0.003866 | -2.32827 | 1.77E-11 | 8.71E-11 |
| AC005224.1 | 0.112992 | 0.229848 | 1.024466 | 1.44E-10 | 6.14E-10 |
| LINC01908  | 0.510097 | 0.156805 | -1.7018  | 1.15E-09 | 4.31E-09 |
| AC090061.1 | 0.108242 | 0.217044 | 1.003719 | 4.99E-06 | 1.12E-05 |
| AC093620.1 | 0.239327 | 0.480087 | 1.004316 | 0.000556 | 0.000933 |
| AC027117.2 | 0.344301 | 1.349831 | 1.971035 | 0.000436 | 0.000741 |
| AC116312.1 | 0.701803 | 0.100127 | -2.80923 | 9.66E-30 | 1.03E-27 |
| PITPNA-AS1 | 2.509244 | 5.216288 | 1.055771 | 6.20E-14 | 4.22E-13 |
| AC104984.4 | 4.000637 | 0.269485 | -3.89195 | 1.00E-31 | 2.30E-29 |
| AL139130.1 | 0.002511 | 0.012807 | 2.350566 | 1.62E-06 | 3.93E-06 |
| LINC01719  | 0.207049 | 0.668125 | 1.690147 | 2.88E-18 | 3.70E-17 |
| AC016027.1 | 0.128852 | 0.326498 | 1.34136  | 4.40E-21 | 7.97E-20 |
| AL031600.1 | 0.418961 | 1.274474 | 1.605014 | 3.46E-11 | 1.63E-10 |
| FGF14-AS2  | 2.908657 | 1.060732 | -1.45529 | 1.40E-24 | 4.59E-23 |
| ARNTL2-AS1 | 0.008115 | 0.116262 | 3.840663 | 2.88E-08 | 9.03E-08 |
| C2orf48    | 0.042191 | 0.368544 | 3.126827 | 2.69E-22 | 5.79E-21 |
| AL034397.3 | 2.747314 | 1.039021 | -1.4028  | 1.33E-18 | 1.78E-17 |
| LINC01436  | 0.890804 | 9.146822 | 3.36009  | 3.46E-07 | 9.24E-07 |
| AC017083.1 | 0.079318 | 0.34532  | 2.122219 | 1.82E-17 | 2.10E-16 |

|             |          |          |          |          |          |
|-------------|----------|----------|----------|----------|----------|
| FAM222A-AS1 | 0.054469 | 0.379987 | 2.80244  | 5.65E-12 | 2.98E-11 |
| AP000873.3  | 0.022097 | 0.068033 | 1.622385 | 1.26E-05 | 2.70E-05 |
| AC117386.2  | 0.0064   | 0.241118 | 5.235627 | 7.09E-11 | 3.17E-10 |
| AC106782.6  | 0.707188 | 1.502879 | 1.087563 | 1.34E-10 | 5.80E-10 |
| AL356752.1  | 0.064935 | 0.275262 | 2.083734 | 0.00327  | 0.004864 |
| AL591686.1  | 0.399729 | 0.061544 | -2.69933 | 2.37E-22 | 5.14E-21 |
| DGCR10      | 0.091992 | 0.444082 | 2.271245 | 8.81E-08 | 2.58E-07 |
| LINC00525   | 0.028132 | 0.362792 | 3.688876 | 2.88E-18 | 3.70E-17 |
| AC009137.2  | 0.050551 | 0.185399 | 1.874826 | 9.46E-05 | 0.000177 |
| AP000692.1  | 0.331748 | 0.697178 | 1.071439 | 1.01E-07 | 2.92E-07 |
| AL133551.1  | 0.030806 | 0.125275 | 2.023807 | 4.38E-15 | 3.55E-14 |
| AC114684.1  | 0.123375 | 0.05837  | -1.07976 | 1.35E-05 | 2.85E-05 |
| LINC01028   | 0.122006 | 0.007625 | -4.00007 | 3.14E-18 | 4.01E-17 |
| LINC02598   | 0.038649 | 0.18068  | 2.224924 | 5.95E-05 | 0.000115 |
| FEZF1-AS1   | 0.03221  | 2.669751 | 6.373059 | 2.19E-25 | 8.79E-24 |
| AC102953.2  | 0.529966 | 1.248519 | 1.236248 | 1.03E-05 | 2.23E-05 |
| PLCB2-AS1   | 0.016974 | 0.056988 | 1.747351 | 2.05E-05 | 4.23E-05 |
| AC011773.1  | 0.04376  | 0.197337 | 2.172963 | 4.32E-08 | 1.33E-07 |
| AC005726.5  | 0.017777 | 0.044559 | 1.325743 | 0.000185 | 0.000331 |
| AL354707.1  | 0.089787 | 0.809551 | 3.172543 | 2.42E-20 | 3.96E-19 |
| SALRNA1     | 0.025996 | 0.232936 | 3.163567 | 2.89E-15 | 2.42E-14 |
| AL355974.3  | 0.085408 | 0.031671 | -1.43121 | 2.37E-08 | 7.50E-08 |
| LINC01963   | 3.183377 | 1.506741 | -1.07913 | 3.43E-21 | 6.37E-20 |
| AL355596.1  | 0.00505  | 0.264428 | 5.710589 | 3.10E-09 | 1.09E-08 |
| AP003555.2  | 0.120099 | 0.392507 | 1.708487 | 0.037214 | 0.046853 |
| NALCN-AS1   | 0.222889 | 0.071564 | -1.63902 | 9.64E-16 | 8.47E-15 |
| AC084030.1  | 0.26288  | 0.01179  | -4.47874 | 7.05E-37 | 5.48E-34 |
| AL606489.1  | 0.250049 | 0.990132 | 1.985409 | 2.72E-13 | 1.68E-12 |
| AP000866.2  | 2.004413 | 0.829359 | -1.27311 | 1.13E-20 | 1.93E-19 |
| AC016683.1  | 0.025308 | 0.083426 | 1.720909 | 0.0138   | 0.018594 |
| AC069544.1  | 0.288058 | 0.838603 | 1.541631 | 1.23E-17 | 1.45E-16 |
| AC107021.2  | 0.162686 | 0.459662 | 1.498483 | 0.000766 | 0.001255 |
| AL355304.1  | 0.626148 | 0.148596 | -2.07511 | 5.44E-07 | 1.41E-06 |
| AC087269.1  | 0.037976 | 0.666746 | 4.133978 | 1.46E-13 | 9.37E-13 |
| AL158042.1  | 0.052123 | 0.023166 | -1.16989 | 6.00E-06 | 1.34E-05 |
| LINC01095   | 0.007591 | 0.003413 | -1.15319 | 2.46E-07 | 6.71E-07 |
| LINC01638   | 0.10556  | 0.219814 | 1.058225 | 6.30E-08 | 1.88E-07 |
| AL136982.1  | 0.065115 | 0.020509 | -1.66673 | 1.44E-16 | 1.44E-15 |
| AL033397.2  | 0.061869 | 1.308015 | 4.402009 | 1.56E-16 | 1.56E-15 |
| LINC00491   | 0.007492 | 0.503928 | 6.071693 | 8.12E-07 | 2.06E-06 |
| AL928742.1  | 0.19532  | 0.589424 | 1.593467 | 2.84E-09 | 1.00E-08 |
| MEIS1-AS3   | 0.02255  | 0.06842  | 1.601295 | 0.0097   | 0.013383 |
| AL442125.1  | 0.179194 | 0.417836 | 1.221414 | 3.87E-05 | 7.64E-05 |
| AL133264.2  | 0.297669 | 0.131944 | -1.17378 | 4.84E-12 | 2.58E-11 |

|             |          |          |          |          |          |
|-------------|----------|----------|----------|----------|----------|
| AL138900.3  | 1.925693 | 0.622712 | -1.62874 | 2.43E-17 | 2.73E-16 |
| AC113404.1  | 0.319896 | 0.053401 | -2.58266 | 0.013647 | 0.018404 |
| LINC01703   | 0.165389 | 0.968299 | 2.549589 | 7.33E-27 | 3.80E-25 |
| IGFL2-AS1   | 0.015964 | 0.31503  | 4.302586 | 5.91E-08 | 1.77E-07 |
| AL355810.1  | 0.021912 | 0.07422  | 1.760073 | 0.004388 | 0.006389 |
| AL132712.2  | 0.571039 | 2.21559  | 1.956029 | 4.91E-19 | 7.08E-18 |
| AP001107.9  | 3.681754 | 1.628897 | -1.1765  | 3.73E-22 | 7.78E-21 |
| AC026250.1  | 0.070577 | 0.325409 | 2.204992 | 5.76E-24 | 1.67E-22 |
| LINC02324   | 0.007355 | 0.06718  | 3.191181 | 2.58E-13 | 1.60E-12 |
| LINC01711   | 0.019198 | 0.335967 | 4.129299 | 6.71E-24 | 1.87E-22 |
| LINC00670   | 0.039401 | 0.013792 | -1.51437 | 1.56E-18 | 2.07E-17 |
| AL109613.1  | 0.308905 | 1.312019 | 2.086553 | 1.15E-13 | 7.45E-13 |
| AC116345.1  | 0.007839 | 0.335284 | 5.418509 | 9.00E-06 | 1.96E-05 |
| LINC01708   | 0.154216 | 0.074919 | -1.04154 | 2.76E-05 | 5.56E-05 |
| AL359697.1  | 0.24188  | 0.554689 | 1.19739  | 0.006621 | 0.009381 |
| AL078587.1  | 0.058344 | 0.429022 | 2.878402 | 4.52E-16 | 4.17E-15 |
| LINC00211   | 0.089613 | 0.020268 | -2.14447 | 1.21E-24 | 4.04E-23 |
| AC104534.1  | 0.403626 | 0.834928 | 1.048631 | 0.033108 | 0.042023 |
| AC079160.1  | 0.001267 | 0.14683  | 6.857077 | 1.33E-11 | 6.63E-11 |
| ARLNC1      | 0.031243 | 0.143365 | 2.198071 | 0.000282 | 0.000491 |
| AC011481.1  | 0.206987 | 0.587584 | 1.505254 | 1.94E-11 | 9.54E-11 |
| EDRF1-AS1   | 0.092947 | 0.202162 | 1.121025 | 0.00916  | 0.012689 |
| LINC02163   | 0.004409 | 0.518183 | 6.876983 | 8.96E-11 | 3.96E-10 |
| MEF2C-AS2   | 0.056477 | 0.011365 | -2.31307 | 3.60E-13 | 2.19E-12 |
| AL391422.2  | 0.14283  | 0.050185 | -1.50896 | 6.89E-07 | 1.76E-06 |
| RNF144A-AS1 | 0.081481 | 0.401076 | 2.299343 | 3.55E-13 | 2.16E-12 |
| LINC00265   | 0.80757  | 1.748608 | 1.114547 | 3.16E-11 | 1.50E-10 |
| BEAN1-AS1   | 0.068918 | 0.167214 | 1.278741 | 0.001899 | 0.002933 |
| AC090772.3  | 0.265688 | 0.855552 | 1.687124 | 3.38E-06 | 7.78E-06 |
| AC098869.2  | 0.221952 | 0.510361 | 1.201269 | 4.61E-05 | 9.03E-05 |
| LINC02313   | 0.021145 | 0.530248 | 4.648308 | 3.89E-12 | 2.09E-11 |
| AC005670.1  | 0.029907 | 0.12855  | 2.103769 | 2.92E-10 | 1.19E-09 |
| AC084026.1  | 0.008442 | 0.101667 | 3.590197 | 1.24E-07 | 3.54E-07 |
| LINC00698   | 0.00125  | 0.013947 | 3.479577 | 5.10E-08 | 1.54E-07 |
| AC010931.2  | 0.081043 | 0.165539 | 1.030419 | 3.37E-05 | 6.69E-05 |
| STK32A-AS1  | 0.137227 | 1.516428 | 3.466045 | 4.89E-17 | 5.29E-16 |
| AL139125.1  | 0.025318 | 0.097513 | 1.945404 | 1.86E-07 | 5.17E-07 |
| AC097347.1  | 0.040782 | 0.173886 | 2.092147 | 7.58E-07 | 1.93E-06 |
| AC023794.4  | 0.039342 | 0.123373 | 1.6489   | 0.003593 | 0.005311 |
| AC117402.1  | 0.088729 | 0.727246 | 3.034973 | 0.004092 | 0.00599  |
| AP003354.1  | 0.057433 | 0.206043 | 1.84298  | 0.00102  | 0.001643 |
| AC068722.2  | 0.549139 | 0.241692 | -1.184   | 3.53E-11 | 1.66E-10 |
| LINC01447   | 0.142433 | 0.020062 | -2.82773 | 4.54E-28 | 3.17E-26 |
| AC236972.3  | 2.806766 | 0.555268 | -2.33765 | 3.46E-27 | 1.96E-25 |

|            |          |          |          |          |          |
|------------|----------|----------|----------|----------|----------|
| AC003965.1 | 0.194545 | 0.420669 | 1.11258  | 9.84E-07 | 2.47E-06 |
| AC037487.1 | 0.025186 | 0.147089 | 2.545995 | 3.34E-07 | 8.93E-07 |
| AC100791.2 | 0.004159 | 0.082908 | 4.31723  | 1.68E-10 | 7.09E-10 |
| AC004771.2 | 0.071628 | 0.227926 | 1.669971 | 4.62E-08 | 1.41E-07 |
| AC135782.1 | 0.002976 | 0.043576 | 3.872038 | 1.44E-07 | 4.06E-07 |
| AC008406.3 | 0.002795 | 0.03765  | 3.751692 | 8.73E-10 | 3.33E-09 |
| COL4A2-AS1 | 0.370293 | 0.156594 | -1.24164 | 8.17E-10 | 3.13E-09 |
| AL356489.2 | 0.163521 | 0.070829 | -1.20706 | 1.13E-17 | 1.35E-16 |
| AC092834.1 | 0.550096 | 0.075828 | -2.85889 | 7.94E-16 | 7.12E-15 |
| AC025166.1 | 0.043234 | 0.355797 | 3.040805 | 1.08E-13 | 7.09E-13 |
| AC083843.1 | 0.018918 | 0.050485 | 1.416085 | 0.000298 | 0.000516 |
| AC005884.1 | 0.829213 | 0.204816 | -2.01742 | 7.55E-24 | 2.09E-22 |
| AC027307.3 | 0.529309 | 0.228806 | -1.20999 | 1.68E-21 | 3.20E-20 |
| AC092535.4 | 1.229268 | 3.383566 | 1.460744 | 9.22E-06 | 2.00E-05 |
| AL022344.2 | 0.248674 | 0.103549 | -1.26395 | 3.02E-14 | 2.17E-13 |
| AC105914.2 | 1.573797 | 0.245502 | -2.68044 | 9.65E-29 | 8.69E-27 |
| VWA8-AS1   | 0.190721 | 0.066119 | -1.52832 | 7.81E-09 | 2.63E-08 |
| AC004990.1 | 0.107058 | 0.333416 | 1.638935 | 0.027131 | 0.034879 |
| AC231981.1 | 0.164192 | 0.357097 | 1.120929 | 8.96E-09 | 2.99E-08 |
| AL354993.2 | 0.034325 | 0.414365 | 3.59359  | 3.12E-07 | 8.38E-07 |
| AC095050.1 | 0.795575 | 0.03636  | -4.45157 | 8.60E-38 | 8.91E-35 |
| AL158835.1 | 0.015451 | 0.05777  | 1.90263  | 7.56E-11 | 3.36E-10 |
| AL121917.1 | 0.186186 | 0.438958 | 1.237334 | 1.21E-10 | 5.24E-10 |
| MYO16-AS1  | 4.29599  | 0.776684 | -2.46759 | 2.42E-25 | 9.36E-24 |
| AC004596.1 | 0.315594 | 0.647221 | 1.036186 | 8.35E-12 | 4.30E-11 |
| AC040169.3 | 0.204072 | 0.490429 | 1.264962 | 3.50E-08 | 1.09E-07 |
| AC016877.3 | 0.054456 | 0.583717 | 3.422101 | 1.82E-16 | 1.79E-15 |
| F11-AS1    | 0.464176 | 0.108142 | -2.10175 | 4.49E-23 | 1.09E-21 |
| LINC01515  | 0.069727 | 0.287368 | 2.043108 | 6.19E-17 | 6.60E-16 |
| AC069503.1 | 0.011182 | 0.046011 | 2.040814 | 2.43E-07 | 6.63E-07 |
| AC009065.6 | 0.015093 | 0.075941 | 2.331022 | 4.00E-07 | 1.06E-06 |
| AC114488.1 | 0.105248 | 0.52896  | 2.329367 | 3.16E-10 | 1.28E-09 |
| AL049612.1 | 0.053109 | 0.123818 | 1.221192 | 0.000929 | 0.001503 |
| AC084117.1 | 0.589365 | 1.316996 | 1.160017 | 5.54E-05 | 0.000107 |
| AC005534.1 | 0.107282 | 0.31331  | 1.546176 | 1.11E-06 | 2.76E-06 |
| AL353616.2 | 0.041183 | 0.011914 | -1.78934 | 1.25E-07 | 3.56E-07 |
| AC004921.1 | 1.509821 | 0.570327 | -1.40452 | 7.29E-21 | 1.28E-19 |
| AC021321.1 | 0.150455 | 0.392419 | 1.383063 | 4.74E-10 | 1.87E-09 |
| SRRM2-AS1  | 0.096657 | 0.236554 | 1.291228 | 3.36E-11 | 1.59E-10 |
| CASC11     | 0.008398 | 0.025443 | 1.599217 | 6.14E-07 | 1.58E-06 |
| AC023794.2 | 0.018277 | 0.133731 | 2.871261 | 1.99E-06 | 4.78E-06 |
| AL353747.2 | 0.563685 | 0.190827 | -1.56262 | 6.20E-07 | 1.59E-06 |
| FGF12-AS2  | 0.014083 | 0.115088 | 3.030699 | 3.22E-05 | 6.40E-05 |
| AC106028.4 | 0.701393 | 0.336154 | -1.0611  | 2.14E-05 | 4.40E-05 |

|            |          |          |          |          |          |
|------------|----------|----------|----------|----------|----------|
| JAZF1-AS1  | 0.038587 | 0.01791  | -1.10733 | 7.91E-13 | 4.64E-12 |
| AL121899.1 | 1.375161 | 0.587228 | -1.22761 | 6.68E-05 | 0.000128 |
| AL096677.1 | 0.040289 | 0.080687 | 1.001937 | 0.000309 | 0.000535 |
| AC244034.2 | 0.098236 | 0.215683 | 1.134581 | 0.000229 | 0.000405 |
| LINC02100  | 0.308895 | 0.887874 | 1.523237 | 1.55E-05 | 3.25E-05 |
| AC040904.1 | 0.071924 | 0.50014  | 2.797781 | 1.84E-08 | 5.93E-08 |
| LINC01968  | 0.002017 | 0.016284 | 3.013445 | 1.24E-11 | 6.24E-11 |
| AC093752.2 | 0.029914 | 0.146899 | 2.295922 | 6.41E-07 | 1.64E-06 |
| LINC00323  | 0.055693 | 0.130943 | 1.233373 | 0.024696 | 0.031939 |
| AC005291.1 | 0.022926 | 0.195711 | 3.09368  | 2.63E-06 | 6.18E-06 |
| TESC-AS1   | 0.016092 | 0.093183 | 2.533739 | 0.010025 | 0.013783 |
| LINC01214  | 0.012156 | 1.308456 | 6.750031 | 4.33E-11 | 2.01E-10 |
| LINC02468  | 0.030265 | 0.230401 | 2.928432 | 0.000127 | 0.000233 |
| ALMS1-IT1  | 0.226164 | 0.609572 | 1.430425 | 1.51E-09 | 5.57E-09 |
| AC004906.1 | 0.01892  | 0.070395 | 1.895534 | 6.40E-06 | 1.42E-05 |
| AC026310.2 | 0.027101 | 0.09309  | 1.780276 | 0.00011  | 0.000205 |
| LINC01126  | 0.104051 | 0.271319 | 1.38269  | 2.47E-07 | 6.72E-07 |
| AC004221.1 | 0.009646 | 0.10318  | 3.419088 | 1.28E-16 | 1.29E-15 |
| LINC02198  | 0.26951  | 0.542887 | 1.01031  | 0.000747 | 0.001225 |
| THCAT158   | 0.259013 | 0.648741 | 1.32462  | 0.000176 | 0.000316 |
| AL022097.1 | 0.032339 | 0.244653 | 2.919387 | 0.004253 | 0.006204 |
| AC025176.1 | 0.072941 | 0.339306 | 2.217778 | 4.85E-12 | 2.58E-11 |
| AC007569.1 | 0.14252  | 0.397462 | 1.479648 | 1.40E-07 | 3.97E-07 |
| LINC01526  | 0.222054 | 0.096899 | -1.19636 | 1.81E-09 | 6.60E-09 |
| AC006058.1 | 0.833776 | 0.382918 | -1.12263 | 1.27E-13 | 8.20E-13 |
| AC090912.2 | 0.042315 | 0.154181 | 1.865374 | 4.53E-09 | 1.57E-08 |
| AC009171.2 | 0.268032 | 0.62256  | 1.215809 | 1.71E-09 | 6.24E-09 |
| KLHL7-DT   | 0.140096 | 0.542922 | 1.954324 | 3.11E-13 | 1.91E-12 |
| AL512604.3 | 0.009752 | 0.037125 | 1.928663 | 1.29E-05 | 2.74E-05 |
| AL353770.4 | 0.256268 | 0.057277 | -2.16162 | 5.33E-14 | 3.68E-13 |
| AC004816.1 | 0.772865 | 6.48718  | 3.069303 | 2.71E-31 | 5.27E-29 |
| AC016708.1 | 0.10806  | 0.436084 | 2.012773 | 1.81E-14 | 1.34E-13 |
| LACTB2-AS1 | 0.051477 | 0.226863 | 2.139819 | 1.80E-13 | 1.14E-12 |
| LINC01614  | 0.217566 | 3.299927 | 3.922911 | 6.12E-24 | 1.74E-22 |
| AP006545.2 | 0.082556 | 0.270936 | 1.714514 | 6.97E-08 | 2.07E-07 |
| AC010973.2 | 0.424873 | 0.953086 | 1.165575 | 1.42E-08 | 4.61E-08 |
| AC109446.3 | 0.190717 | 1.031489 | 2.435225 | 1.10E-06 | 2.74E-06 |
| AC092794.2 | 0.042439 | 0.184219 | 2.117965 | 0.000407 | 0.000694 |
| AC068025.2 | 0.036293 | 0.245436 | 2.757597 | 0.003499 | 0.005186 |
| AL157838.1 | 0.139752 | 0.901301 | 2.689139 | 4.26E-24 | 1.28E-22 |
| AC053503.4 | 0.190311 | 0.058188 | -1.70955 | 4.60E-11 | 2.13E-10 |
| AC078778.1 | 0.182177 | 0.854998 | 2.230576 | 5.61E-17 | 6.01E-16 |
| LINC00511  | 0.320201 | 3.054288 | 3.253787 | 1.21E-28 | 1.05E-26 |
| LINC02156  | 0.015644 | 0.259131 | 4.050017 | 8.03E-15 | 6.22E-14 |

|            |          |          |          |          |          |
|------------|----------|----------|----------|----------|----------|
| AL133355.1 | 4.680814 | 2.019931 | -1.21245 | 5.82E-24 | 1.67E-22 |
| AC073641.1 | 0.034809 | 0.12914  | 1.891393 | 2.27E-09 | 8.11E-09 |
| AF230666.2 | 0.022695 | 0.150652 | 2.730747 | 4.79E-08 | 1.46E-07 |
| AC004461.2 | 0.122141 | 0.28797  | 1.237368 | 0.006718 | 0.009503 |
| AC113346.1 | 0.010891 | 0.405659 | 5.219003 | 5.41E-16 | 4.95E-15 |
| AC093585.1 | 0.083263 | 0.274605 | 1.721607 | 0.003572 | 0.005283 |
| AC009097.1 | 0.028235 | 0.058375 | 1.047894 | 0.003762 | 0.005538 |
| AC109479.1 | 0.016538 | 0.057902 | 1.807785 | 4.36E-05 | 8.58E-05 |
| AL645608.1 | 0.103984 | 0.354336 | 1.768761 | 1.89E-10 | 7.94E-10 |
| AC068858.1 | 0.004554 | 0.025256 | 2.471571 | 1.67E-07 | 4.66E-07 |
| LINC00638  | 0.499552 | 1.131614 | 1.179676 | 3.38E-11 | 1.59E-10 |
| LINC02552  | 0.041795 | 0.008404 | -2.31411 | 1.52E-17 | 1.77E-16 |
| AC010524.1 | 0.128153 | 0.270758 | 1.079135 | 0.004068 | 0.005959 |
| AC024560.1 | 0.023082 | 0.150497 | 2.704892 | 2.39E-09 | 8.51E-09 |
| LINC00629  | 0.018769 | 0.245531 | 3.709498 | 4.81E-19 | 6.95E-18 |
| AC090826.1 | 0.009219 | 0.042706 | 2.211805 | 1.70E-05 | 3.55E-05 |
| AL157400.2 | 0.005201 | 0.076919 | 3.886394 | 1.36E-12 | 7.73E-12 |
| AL591441.1 | 0.016684 | 0.007256 | -1.20125 | 2.71E-06 | 6.34E-06 |
| AC128709.2 | 0.395943 | 0.087947 | -2.17058 | 1.19E-28 | 1.04E-26 |
| AC009121.2 | 0.053104 | 0.204555 | 1.945608 | 1.34E-15 | 1.16E-14 |
| AL024498.1 | 0.124508 | 0.376193 | 1.595239 | 1.05E-19 | 1.63E-18 |
| MORC2-AS1  | 0.0572   | 0.115583 | 1.014831 | 1.82E-05 | 3.77E-05 |
| AC004112.1 | 0.670723 | 0.262763 | -1.35196 | 1.61E-21 | 3.09E-20 |
| AC020661.3 | 0.043893 | 0.254824 | 2.537435 | 0.032545 | 0.041351 |
| AL157823.2 | 0.072883 | 0.22938  | 1.654077 | 4.03E-06 | 9.20E-06 |
| AC104237.2 | 0.794452 | 0.073345 | -3.43719 | 8.19E-36 | 5.66E-33 |
| AL928970.1 | 0.004455 | 0.013085 | 1.554277 | 0.000679 | 0.001119 |
| AL136369.1 | 2.242598 | 0.290847 | -2.94684 | 8.88E-33 | 3.25E-30 |
| MGC12916   | 0.192979 | 0.445344 | 1.206473 | 7.76E-06 | 1.70E-05 |
| AL358115.1 | 0.035561 | 0.191911 | 2.432082 | 3.55E-11 | 1.67E-10 |
| LINC02539  | 0.020603 | 0.077204 | 1.905822 | 1.16E-05 | 2.49E-05 |
| AC087683.2 | 0.164291 | 0.447256 | 1.444842 | 0.005327 | 0.007666 |
| CAMTA1-DT  | 0.227091 | 0.527714 | 1.216484 | 2.05E-08 | 6.56E-08 |
| AP002907.1 | 0.26495  | 0.899346 | 1.763157 | 9.12E-12 | 4.67E-11 |
| U52111.1   | 0.12166  | 0.648066 | 2.413286 | 5.83E-19 | 8.31E-18 |
| AC124854.1 | 0.169836 | 0.076853 | -1.14397 | 3.31E-16 | 3.14E-15 |
| AC048337.1 | 0.024075 | 0.080654 | 1.744226 | 1.36E-06 | 3.32E-06 |
| AP002807.1 | 0.711986 | 1.501893 | 1.07686  | 4.03E-07 | 1.06E-06 |
| LINC00313  | 0.016248 | 0.039679 | 1.28807  | 0.007205 | 0.01015  |
| AC127024.3 | 0.077492 | 0.384961 | 2.31259  | 4.09E-06 | 9.33E-06 |
| LINC01842  | 0.056182 | 0.720542 | 3.680907 | 9.27E-14 | 6.12E-13 |
| AC127024.2 | 0.081804 | 0.243319 | 1.572606 | 2.14E-06 | 5.10E-06 |
| LINC02006  | 0.301668 | 0.129395 | -1.22119 | 3.96E-11 | 1.85E-10 |
| AC092155.1 | 0.037046 | 0.012248 | -1.59673 | 3.83E-10 | 1.53E-09 |



|            |          |          |          |          |          |
|------------|----------|----------|----------|----------|----------|
| THRA1/BTR  | 0.005688 | 0.286595 | 5.654863 | 1.08E-11 | 5.49E-11 |
| AC011479.2 | 0.141935 | 0.325749 | 1.198527 | 6.04E-05 | 0.000116 |
| AC044810.3 | 0.042719 | 0.002946 | -3.85827 | 5.89E-28 | 3.94E-26 |
| AL138720.1 | 0.015199 | 0.078022 | 2.359948 | 1.93E-10 | 8.06E-10 |
| LINC00551  | 1.467295 | 0.179066 | -3.03459 | 4.35E-16 | 4.02E-15 |
| AC020978.1 | 0.064296 | 0.172953 | 1.427575 | 0.000515 | 0.000868 |
| KCTD21-AS1 | 0.221736 | 0.49448  | 1.15707  | 7.81E-13 | 4.59E-12 |
| AC084064.1 | 0.089697 | 0.027319 | -1.71513 | 3.09E-15 | 2.57E-14 |
| AC120498.4 | 0.01155  | 1.01533  | 6.457899 | 3.83E-16 | 3.60E-15 |
| LINC02014  | 0.085765 | 1.436347 | 4.065865 | 2.62E-30 | 3.55E-28 |
| AC009148.1 | 0.036044 | 0.168147 | 2.221878 | 9.12E-16 | 8.10E-15 |
| AC019155.3 | 0.013284 | 0.615838 | 5.534783 | 1.43E-07 | 4.04E-07 |
| AL133215.2 | 0.091719 | 0.4396   | 2.260901 | 4.56E-26 | 2.04E-24 |
| AC106779.1 | 0.014318 | 0.058445 | 2.02926  | 5.75E-11 | 2.62E-10 |
| AL353801.3 | 0.087788 | 0.29728  | 1.759732 | 2.14E-10 | 8.90E-10 |
| AC004158.1 | 0.00084  | 0.018327 | 4.447693 | 1.92E-06 | 4.63E-06 |
| AP003086.2 | 0.080328 | 0.258004 | 1.683423 | 0.000126 | 0.000232 |
| AF131215.7 | 0.724851 | 0.170668 | -2.0865  | 5.31E-26 | 2.31E-24 |
| AL928654.1 | 0.440701 | 1.102225 | 1.322548 | 4.43E-15 | 3.58E-14 |
| AC110285.6 | 0.095554 | 0.517061 | 2.435954 | 4.39E-13 | 2.65E-12 |
| AL162414.1 | 0.048496 | 0.132832 | 1.453651 | 0.00572  | 0.008175 |
| AL449106.1 | 0.079014 | 0.187617 | 1.247606 | 1.96E-12 | 1.09E-11 |
| AL023803.2 | 0.077287 | 0.249727 | 1.692046 | 2.30E-12 | 1.27E-11 |
| MAFG-DT    | 1.513366 | 3.836775 | 1.342133 | 1.65E-17 | 1.91E-16 |
| AC024257.3 | 0.109971 | 0.3473   | 1.659055 | 1.30E-10 | 5.63E-10 |
| AL031123.2 | 0.157884 | 0.45483  | 1.526461 | 4.51E-13 | 2.72E-12 |
| LINC01547  | 0.654506 | 2.151546 | 1.716895 | 6.61E-15 | 5.23E-14 |
| AC098828.3 | 0.029549 | 0.109315 | 1.887312 | 0.006013 | 0.008567 |
| AL592164.1 | 0.010589 | 0.030386 | 1.520896 | 9.74E-05 | 0.000182 |
| AL731684.1 | 0.008475 | 0.256416 | 4.919069 | 2.88E-12 | 1.57E-11 |
| AL357992.1 | 0.173912 | 0.620673 | 1.835473 | 1.63E-08 | 5.28E-08 |
| MIR2117HG  | 0.022393 | 0.087859 | 1.972138 | 0.000282 | 0.00049  |
| SYNPR-AS1  | 0.400518 | 1.755819 | 2.132206 | 1.70E-10 | 7.18E-10 |
| LINC02601  | 0.063435 | 0.134194 | 1.080966 | 3.08E-05 | 6.15E-05 |
| AC068051.1 | 0.028211 | 0.094923 | 1.750504 | 0.007704 | 0.0108   |
| AC006441.1 | 0.168679 | 0.4037   | 1.259001 | 0.002606 | 0.003935 |
| LINC01836  | 3.771993 | 1.286343 | -1.55205 | 6.32E-19 | 8.97E-18 |
| AL391807.1 | 0.235263 | 0.097695 | -1.26791 | 9.53E-17 | 9.83E-16 |
| WWC2-AS2   | 0.609505 | 0.213501 | -1.5134  | 2.52E-23 | 6.32E-22 |
| TRIM31-AS1 | 0.226158 | 1.218547 | 2.429759 | 2.00E-15 | 1.70E-14 |
| AC074117.1 | 0.78352  | 1.841647 | 1.232955 | 4.96E-19 | 7.12E-18 |
| AL022341.2 | 0.034985 | 0.164096 | 2.229745 | 3.80E-08 | 1.17E-07 |
| AP000977.1 | 0.007762 | 0.054573 | 2.813746 | 5.14E-11 | 2.37E-10 |
| AL137796.1 | 0.039605 | 0.088467 | 1.159447 | 0.001122 | 0.001794 |

|            |          |          |          |          |          |
|------------|----------|----------|----------|----------|----------|
| AC012531.1 | 0.007047 | 0.107937 | 3.937088 | 5.95E-08 | 1.79E-07 |
| AL450992.2 | 2.53578  | 10.79013 | 2.08921  | 1.40E-20 | 2.35E-19 |
| LGALS8-AS1 | 0.088438 | 0.255497 | 1.530568 | 3.09E-10 | 1.25E-09 |
| AP002498.1 | 0.110561 | 2.008066 | 4.182895 | 3.90E-16 | 3.66E-15 |
| AC092828.1 | 0.034723 | 0.290301 | 3.0636   | 4.88E-05 | 9.54E-05 |
| AC013457.1 | 5.148034 | 0.625563 | -3.04079 | 7.81E-19 | 1.09E-17 |
| AC005532.1 | 0.047705 | 0.187725 | 1.976403 | 1.14E-05 | 2.45E-05 |
| AC016773.1 | 0.208586 | 0.897461 | 2.105208 | 7.69E-20 | 1.21E-18 |
| AC009509.4 | 0.655946 | 0.2732   | -1.26362 | 2.21E-17 | 2.50E-16 |
| SATB1-AS1  | 0.028001 | 0.074004 | 1.402108 | 2.33E-06 | 5.50E-06 |
| LINC02284  | 0.083232 | 0.03739  | -1.15448 | 5.14E-11 | 2.37E-10 |
| LINC00896  | 0.040517 | 0.440741 | 3.443345 | 3.21E-22 | 6.86E-21 |
| AC112484.3 | 0.197052 | 0.506917 | 1.363169 | 0.000418 | 0.000712 |
| AC136475.3 | 3.57386  | 15.99053 | 2.161663 | 1.48E-06 | 3.61E-06 |
| LINC02416  | 0.042084 | 0.889525 | 4.401699 | 1.68E-26 | 8.03E-25 |
| AC048382.1 | 0.041418 | 0.111873 | 1.433544 | 9.43E-08 | 2.75E-07 |
| AL359636.2 | 0.043075 | 0.29442  | 2.772967 | 1.08E-05 | 2.33E-05 |
| ATP2B1-AS1 | 0.794382 | 0.389715 | -1.02741 | 1.16E-19 | 1.78E-18 |
| AC138696.2 | 0.76965  | 1.760374 | 1.193607 | 4.54E-11 | 2.10E-10 |
| AC027796.1 | 0.081912 | 0.285297 | 1.800315 | 4.72E-06 | 1.07E-05 |
| AF127936.2 | 0.017664 | 0.170286 | 3.26907  | 2.12E-17 | 2.41E-16 |
| AL158211.1 | 0.451509 | 0.170124 | -1.40817 | 3.06E-21 | 5.73E-20 |
| AC135012.2 | 0.04958  | 0.015998 | -1.63182 | 4.84E-08 | 1.47E-07 |
| LINC01485  | 0.021464 | 0.110152 | 2.359502 | 5.00E-08 | 1.52E-07 |
| AC003991.2 | 0.089503 | 0.215223 | 1.265824 | 0.009572 | 0.013219 |
| Z97055.2   | 0.079385 | 0.166761 | 1.070846 | 5.68E-07 | 1.47E-06 |
| AP000786.1 | 0.320716 | 0.839721 | 1.388613 | 0.000195 | 0.000349 |
| AL445426.1 | 0.366746 | 0.12107  | -1.59894 | 1.21E-18 | 1.64E-17 |
| AC078905.1 | 0.167092 | 0.026457 | -2.6589  | 2.80E-24 | 8.66E-23 |
| AC103706.1 | 0.540772 | 1.387889 | 1.359799 | 1.37E-08 | 4.47E-08 |
| AC012625.1 | 0.03324  | 0.144271 | 2.117772 | 0.00082  | 0.001339 |
| AL391427.1 | 0.122071 | 1.962976 | 4.007253 | 6.54E-07 | 1.67E-06 |
| LINC01559  | 0.007321 | 0.646746 | 6.464994 | 1.11E-12 | 6.40E-12 |
| AL109615.3 | 0.248236 | 2.292623 | 3.207217 | 3.59E-17 | 3.96E-16 |
| ELFN1-AS1  | 0.058779 | 0.909911 | 3.952359 | 3.18E-10 | 1.29E-09 |
| AL079307.1 | 0.001703 | 0.015926 | 3.225451 | 9.00E-06 | 1.96E-05 |
| LINC02600  | 0.240293 | 0.114822 | -1.0654  | 1.18E-20 | 1.99E-19 |
| AC027627.1 | 0.001196 | 0.078265 | 6.031563 | 1.04E-10 | 4.57E-10 |
| AC004832.5 | 0.175827 | 0.534942 | 1.605229 | 1.57E-05 | 3.28E-05 |
| AC025524.2 | 0.002875 | 0.023097 | 3.00592  | 1.97E-06 | 4.73E-06 |
| CA3-AS1    | 0.532804 | 0.25434  | -1.06685 | 7.90E-18 | 9.63E-17 |
| SLC9A3-AS1 | 0.791059 | 2.822462 | 1.835096 | 2.10E-10 | 8.75E-10 |
| AC007750.1 | 0.022378 | 0.120875 | 2.433356 | 8.56E-19 | 1.19E-17 |
| AC109322.1 | 0.406108 | 1.101105 | 1.439016 | 2.83E-19 | 4.18E-18 |

|               |          |          |          |          |          |
|---------------|----------|----------|----------|----------|----------|
| AP006621.2    | 0.726461 | 1.729214 | 1.251159 | 3.07E-05 | 6.13E-05 |
| LINC02321     | 0.104981 | 0.748217 | 2.833322 | 7.59E-14 | 5.09E-13 |
| AC009163.3    | 0.050788 | 0.173881 | 1.775534 | 0.002101 | 0.00322  |
| AC022973.4    | 0.187768 | 0.464384 | 1.306368 | 1.31E-07 | 3.72E-07 |
| AC211433.1    | 0.037694 | 0.426685 | 3.500752 | 1.13E-07 | 3.25E-07 |
| AL031710.1    | 0.031692 | 0.159134 | 2.328031 | 0.003677 | 0.005424 |
| AC104938.1    | 0.466225 | 0.181729 | -1.35924 | 4.63E-21 | 8.32E-20 |
| AC097468.1    | 0.081923 | 0.342979 | 2.065781 | 4.57E-10 | 1.81E-09 |
| AC015921.1    | 0.026474 | 0.255773 | 3.272241 | 3.10E-25 | 1.17E-23 |
| LINC00471     | 0.176338 | 0.446832 | 1.341387 | 4.24E-15 | 3.45E-14 |
| AL160313.1    | 0.143427 | 0.05919  | -1.27691 | 1.52E-13 | 9.74E-13 |
| CTD-3080P12.3 | 0.330936 | 0.08464  | -1.96714 | 0.002678 | 0.00404  |
| LINC01106     | 0.293074 | 0.782188 | 1.416252 | 3.98E-13 | 2.41E-12 |
| AC096536.1    | 0.056878 | 0.19584  | 1.783737 | 1.08E-06 | 2.68E-06 |
| AC120114.1    | 0.127253 | 0.461346 | 1.858146 | 4.49E-21 | 8.10E-20 |
| AC110285.3    | 0.146517 | 0.418063 | 1.512648 | 0.000162 | 0.000292 |
| MIR503HG      | 0.344965 | 1.281536 | 1.893351 | 1.88E-11 | 9.22E-11 |
| AP001453.3    | 0.665146 | 1.426662 | 1.1009   | 4.33E-15 | 3.52E-14 |
| AC104260.1    | 0.134093 | 0.034971 | -1.939   | 1.89E-18 | 2.50E-17 |
| LINC00336     | 0.039722 | 0.105159 | 1.404554 | 0.000921 | 0.001492 |
| LINC01012     | 0.057933 | 0.256868 | 2.148572 | 5.00E-19 | 7.16E-18 |
| LINC01081     | 0.359039 | 0.038285 | -3.22931 | 2.73E-32 | 8.08E-30 |
| LINC00930     | 0.842237 | 0.40827  | -1.0447  | 4.64E-14 | 3.23E-13 |
| AL121832.2    | 0.969335 | 2.37045  | 1.290094 | 4.45E-10 | 1.77E-09 |
| AL139397.1    | 0.085827 | 0.222847 | 1.376554 | 2.00E-09 | 7.22E-09 |
| AC133644.2    | 0.153834 | 0.696658 | 2.179077 | 2.40E-13 | 1.49E-12 |
| AC020928.2    | 0.007698 | 0.025512 | 1.728657 | 0.002054 | 0.003155 |
| AC239584.1    | 0.011311 | 0.264913 | 4.549749 | 5.42E-07 | 1.41E-06 |
| AC020911.1    | 0.089909 | 0.191706 | 1.092365 | 2.20E-07 | 6.06E-07 |
| AC131011.1    | 0.147024 | 0.575136 | 1.96785  | 2.43E-14 | 1.78E-13 |
| AC111170.1    | 0.037706 | 0.17217  | 2.190977 | 0.009321 | 0.0129   |
| AC068189.1    | 0.008184 | 0.086656 | 3.404366 | 7.86E-14 | 5.24E-13 |
| AC104561.1    | 0.052513 | 0.141953 | 1.434663 | 1.19E-08 | 3.90E-08 |
| AC087379.1    | 0.006201 | 0.151507 | 4.610799 | 7.56E-08 | 2.24E-07 |
| AL590666.2    | 0.199338 | 2.812761 | 3.8187   | 6.04E-16 | 5.49E-15 |
| AL109811.2    | 0.273128 | 0.670926 | 1.296576 | 1.26E-14 | 9.48E-14 |
| MIAT          | 0.574489 | 2.241792 | 1.964301 | 6.94E-07 | 1.77E-06 |
| AC092535.1    | 0.026293 | 0.240887 | 3.195601 | 5.51E-07 | 1.43E-06 |
| LINC02265     | 0.667461 | 0.180946 | -1.88313 | 9.94E-08 | 2.88E-07 |
| AL669831.5    | 0.070747 | 0.260248 | 1.879144 | 3.54E-14 | 2.52E-13 |
| LINC02029     | 0.005476 | 0.125275 | 4.515811 | 4.29E-14 | 2.99E-13 |
| AC091057.4    | 0.063814 | 0.487502 | 2.933467 | 8.82E-21 | 1.53E-19 |
| AP001347.1    | 0.10704  | 0.23833  | 1.154803 | 2.44E-07 | 6.67E-07 |
| AC079336.1    | 0.030864 | 0.099605 | 1.690286 | 0.000184 | 0.000328 |

|             |          |          |          |          |          |
|-------------|----------|----------|----------|----------|----------|
| AC007128.1  | 0.009568 | 0.55845  | 5.867109 | 9.15E-21 | 1.57E-19 |
| FIRRE       | 0.060169 | 0.381551 | 2.66479  | 1.78E-08 | 5.73E-08 |
| AL513314.2  | 0.072846 | 0.191626 | 1.395373 | 9.58E-09 | 3.18E-08 |
| UCA1        | 0.052673 | 2.875255 | 5.770493 | 1.13E-11 | 5.70E-11 |
| AL606970.3  | 0.005652 | 0.067189 | 3.571435 | 0.000876 | 0.001424 |
| AC093390.1  | 0.038034 | 0.009714 | -1.96909 | 1.51E-17 | 1.76E-16 |
| AC024901.1  | 0.064588 | 0.549154 | 3.087878 | 4.53E-07 | 1.19E-06 |
| AC105001.1  | 0.399931 | 0.152431 | -1.39159 | 7.66E-17 | 8.04E-16 |
| AC108860.2  | 0.634879 | 1.359649 | 1.09868  | 1.80E-10 | 7.55E-10 |
| AC087289.1  | 0.079458 | 0.188198 | 1.243989 | 1.27E-07 | 3.62E-07 |
| ADIRF-AS1   | 2.09611  | 1.040745 | -1.0101  | 1.54E-15 | 1.33E-14 |
| LINC01996   | 3.138186 | 0.148401 | -4.40236 | 2.92E-33 | 1.13E-30 |
| AC010761.4  | 0.12598  | 0.446732 | 1.826208 | 7.96E-15 | 6.18E-14 |
| AL591368.1  | 0.012802 | 0.033061 | 1.368699 | 0.000354 | 0.000608 |
| LINC01561   | 0.008408 | 0.092667 | 3.462201 | 5.18E-13 | 3.10E-12 |
| AC015853.1  | 0.052278 | 0.18538  | 1.826215 | 5.36E-08 | 1.62E-07 |
| AP000251.1  | 0.035771 | 0.479385 | 3.744322 | 2.44E-15 | 2.07E-14 |
| AC024884.2  | 0.028358 | 0.082991 | 1.549188 | 4.90E-07 | 1.28E-06 |
| LINC00867   | 0.012113 | 0.074761 | 2.62578  | 0.025801 | 0.0333   |
| LINC01237   | 0.117199 | 0.282643 | 1.270018 | 5.57E-07 | 1.44E-06 |
| AL357093.2  | 4.514498 | 1.354025 | -1.73731 | 2.97E-10 | 1.21E-09 |
| AL133153.2  | 0.037496 | 0.286686 | 2.934655 | 3.82E-19 | 5.59E-18 |
| AP003385.3  | 0.089129 | 0.042036 | -1.08426 | 7.38E-08 | 2.19E-07 |
| LINC00184   | 0.025625 | 0.124431 | 2.279741 | 2.68E-07 | 7.29E-07 |
| AC002310.2  | 0.010193 | 0.02656  | 1.381658 | 7.82E-05 | 0.000148 |
| AC011005.4  | 0.051948 | 0.183668 | 1.821947 | 1.20E-05 | 2.58E-05 |
| AC145124.1  | 0.458393 | 0.191961 | -1.25577 | 1.39E-17 | 1.63E-16 |
| AC132192.2  | 0.271942 | 0.862596 | 1.665386 | 2.71E-15 | 2.29E-14 |
| FP671120.4  | 0.320403 | 0.760495 | 1.247048 | 0.001056 | 0.001698 |
| AC011899.1  | 0.084588 | 0.040483 | -1.06316 | 1.96E-09 | 7.10E-09 |
| AC104024.2  | 0.028084 | 0.291046 | 3.373441 | 2.65E-18 | 3.42E-17 |
| Z69720.1    | 0.019735 | 0.05223  | 1.404112 | 0.000625 | 0.001039 |
| AC107884.2  | 0.144727 | 0.330346 | 1.190648 | 0.000531 | 0.000892 |
| AC099343.2  | 0.246351 | 0.699036 | 1.504653 | 5.25E-08 | 1.58E-07 |
| AL162632.3  | 0.014409 | 0.059422 | 2.043973 | 6.63E-12 | 3.45E-11 |
| AL160191.1  | 0.057587 | 0.016951 | -1.7644  | 4.19E-12 | 2.25E-11 |
| LINC01863   | 1.96973  | 0.224119 | -3.13566 | 6.79E-31 | 1.17E-28 |
| AC104257.1  | 0.351281 | 0.03523  | -3.31775 | 1.15E-32 | 3.58E-30 |
| AC006557.1  | 0.037577 | 0.089263 | 1.248232 | 0.000128 | 0.000235 |
| AL355974.2  | 0.752078 | 0.112779 | -2.73738 | 1.53E-25 | 6.27E-24 |
| AC009237.15 | 1.159336 | 2.42488  | 1.064615 | 0.000627 | 0.001042 |
| ACTN1-AS1   | 0.040374 | 0.092974 | 1.203404 | 1.87E-05 | 3.87E-05 |
| LINC01374   | 0.069514 | 0.142208 | 1.032617 | 0.028306 | 0.036337 |
| AL139089.1  | 0.282736 | 0.738627 | 1.38539  | 6.39E-12 | 3.33E-11 |

|            |          |          |          |          |          |
|------------|----------|----------|----------|----------|----------|
| AC083837.1 | 1.001179 | 0.362689 | -1.4649  | 3.69E-08 | 1.14E-07 |
| LINC01705  | 0.038431 | 0.665227 | 4.113519 | 9.72E-21 | 1.66E-19 |
| LINC00567  | 0.008458 | 0.143938 | 4.088988 | 7.06E-06 | 1.56E-05 |
| Z95331.1   | 0.022361 | 0.106072 | 2.245971 | 1.39E-10 | 5.96E-10 |
| ZKSCAN2-DT | 0.275935 | 0.862503 | 1.644204 | 3.35E-14 | 2.40E-13 |
| BX284668.6 | 0.033407 | 0.16068  | 2.265984 | 1.89E-08 | 6.08E-08 |
| AL023803.1 | 0.07474  | 0.270448 | 1.855395 | 1.28E-06 | 3.14E-06 |
| AC009754.1 | 0.077867 | 0.537652 | 2.787594 | 0.00372  | 0.005481 |
| LINC01124  | 0.513452 | 1.131296 | 1.139674 | 0.000443 | 0.000752 |
| AP003472.2 | 0.010457 | 0.07524  | 2.84701  | 3.60E-09 | 1.26E-08 |
| AC103809.1 | 0.112164 | 0.041116 | -1.44783 | 2.54E-08 | 8.00E-08 |
| SMCR5      | 0.013061 | 0.098075 | 2.908625 | 0.008129 | 0.011352 |
| AL135902.1 | 0.207633 | 0.043769 | -2.24604 | 1.11E-16 | 1.14E-15 |
| AL591806.1 | 0.060787 | 0.191687 | 1.656926 | 1.00E-07 | 2.91E-07 |
| AC064805.1 | 0.113711 | 0.034865 | -1.70553 | 1.71E-19 | 2.57E-18 |
| AC139491.2 | 0.038014 | 0.168694 | 2.149803 | 0.002008 | 0.003089 |
| AL691482.3 | 0.866787 | 3.665672 | 2.080328 | 2.82E-12 | 1.54E-11 |
| AL355312.3 | 1.352201 | 9.167241 | 2.761178 | 4.99E-18 | 6.22E-17 |
| AP001160.1 | 0.326672 | 0.770837 | 1.238581 | 1.58E-13 | 1.01E-12 |
| AL139123.1 | 0.142501 | 0.416097 | 1.545953 | 2.30E-10 | 9.53E-10 |
| AC090970.2 | 0.140965 | 0.3148   | 1.159093 | 3.73E-06 | 8.54E-06 |
| NKAIN3-IT1 | 0.004237 | 0.108453 | 4.67789  | 7.87E-08 | 2.33E-07 |
| AL135960.1 | 0.274147 | 0.054077 | -2.34187 | 6.60E-25 | 2.28E-23 |
| AC002128.1 | 0.381885 | 0.781136 | 1.032434 | 1.21E-05 | 2.58E-05 |
| AL356056.2 | 0.51664  | 0.164731 | -1.64905 | 2.31E-21 | 4.35E-20 |
| AC010754.1 | 0.990341 | 0.352957 | -1.48843 | 5.42E-18 | 6.74E-17 |
| AC091182.2 | 0.040002 | 0.189251 | 2.242158 | 0.011186 | 0.015274 |
| AC129926.1 | 0.094998 | 0.523177 | 2.461336 | 0.000621 | 0.001034 |
| AC130371.2 | 2.587134 | 0.9879   | -1.38892 | 3.70E-22 | 7.74E-21 |
| DGCR9      | 0.092894 | 0.857617 | 3.206684 | 1.67E-18 | 2.22E-17 |
| AC005618.1 | 0.146092 | 0.385901 | 1.401357 | 1.02E-06 | 2.55E-06 |
| AL161452.1 | 0.1034   | 0.265647 | 1.361275 | 1.98E-11 | 9.68E-11 |
| AP000821.1 | 0.071334 | 0.021058 | -1.7602  | 5.05E-11 | 2.33E-10 |
| AL035420.1 | 0.02467  | 0.07462  | 1.596829 | 0.000672 | 0.001109 |
| AC093904.4 | 0.023883 | 0.356678 | 3.900592 | 1.20E-15 | 1.05E-14 |
| AC093772.1 | 0.354242 | 0.12369  | -1.518   | 1.04E-19 | 1.62E-18 |
| AL161781.2 | 0.036638 | 0.083739 | 1.192554 | 1.20E-06 | 2.97E-06 |
| AC007861.1 | 0.057185 | 0.009067 | -2.65691 | 4.89E-22 | 9.93E-21 |
| AL033527.3 | 0.042178 | 0.183975 | 2.124949 | 7.31E-15 | 5.75E-14 |
| AC063919.1 | 0.282658 | 0.122753 | -1.2033  | 4.41E-10 | 1.75E-09 |
| AC009743.1 | 0.009597 | 0.16611  | 4.11346  | 2.40E-06 | 5.65E-06 |
| LINC01779  | 0.055276 | 0.013864 | -1.99527 | 9.39E-13 | 5.47E-12 |
| AL671710.1 | 0.156119 | 0.315398 | 1.014528 | 1.66E-13 | 1.06E-12 |
| AC044802.2 | 0.051752 | 0.172422 | 1.736259 | 3.06E-06 | 7.09E-06 |

|            |          |          |          |          |          |
|------------|----------|----------|----------|----------|----------|
| AL049875.1 | 0.045051 | 0.18367  | 2.027488 | 2.34E-06 | 5.52E-06 |
| AC103591.3 | 0.315    | 1.069126 | 1.763009 | 2.39E-05 | 4.87E-05 |
| AL136162.1 | 0.109154 | 0.462805 | 2.084043 | 1.06E-19 | 1.64E-18 |
| AC093734.1 | 0.040648 | 0.108355 | 1.4145   | 0.005615 | 0.008034 |
| MELTF-AS1  | 0.570993 | 1.849425 | 1.695531 | 1.03E-16 | 1.06E-15 |
| PTPRD-AS1  | 0.544879 | 0.125584 | -2.11728 | 3.80E-27 | 2.11E-25 |
| AC079336.2 | 0.079381 | 0.204145 | 1.362733 | 4.99E-07 | 1.30E-06 |
| AC090192.2 | 0.006301 | 0.24065  | 5.255235 | 1.95E-10 | 8.13E-10 |
| LUCAT1     | 0.196535 | 2.14012  | 3.444832 | 3.18E-15 | 2.65E-14 |
| AC010973.1 | 0.201437 | 0.405231 | 1.008414 | 9.50E-06 | 2.06E-05 |
| LINC00628  | 0.005807 | 0.100311 | 4.110584 | 6.74E-19 | 9.51E-18 |
| MIR3150BHG | 0.015081 | 0.088902 | 2.559521 | 1.11E-11 | 5.63E-11 |
| LINC02223  | 0.004347 | 0.080932 | 4.218775 | 1.90E-07 | 5.26E-07 |
| AC007879.3 | 0.08492  | 0.266559 | 1.650285 | 1.99E-15 | 1.70E-14 |
| AC107214.1 | 0.189309 | 0.398955 | 1.075485 | 3.63E-10 | 1.46E-09 |
| AL132639.3 | 0.153553 | 0.311303 | 1.019581 | 5.55E-07 | 1.44E-06 |
| AC004771.1 | 0.353919 | 0.719779 | 1.024136 | 4.66E-08 | 1.42E-07 |
| LINC02323  | 0.050542 | 0.42819  | 3.082701 | 4.96E-14 | 3.43E-13 |
| AL683807.1 | 0.259302 | 0.723233 | 1.479829 | 2.28E-06 | 5.39E-06 |
| AL158825.2 | 0.169965 | 0.372629 | 1.132499 | 0.000102 | 0.00019  |
| AL158168.1 | 0.143902 | 0.039516 | -1.86457 | 3.60E-05 | 7.14E-05 |
| AL157788.1 | 0.053118 | 0.206443 | 1.958471 | 3.82E-07 | 1.01E-06 |
| AC007368.1 | 0.015361 | 0.391904 | 4.673125 | 3.60E-06 | 8.25E-06 |
| AL356740.2 | 0.062263 | 0.224042 | 1.847332 | 0.001829 | 0.002836 |
| ATP2A1-AS1 | 0.304132 | 1.028492 | 1.757763 | 1.17E-15 | 1.02E-14 |
| AC092746.1 | 0.09656  | 0.040588 | -1.25036 | 1.46E-09 | 5.40E-09 |
| LINC01907  | 0.019521 | 0.045882 | 1.232926 | 4.99E-05 | 9.74E-05 |
| CASK-AS1   | 0.045116 | 0.128564 | 1.510766 | 5.03E-07 | 1.31E-06 |
| AC023794.5 | 0.026271 | 0.096536 | 1.877582 | 2.29E-07 | 6.28E-07 |
| LINC02471  | 5.253083 | 1.267949 | -2.05067 | 5.73E-24 | 1.67E-22 |
| AC093865.1 | 0.036281 | 0.203424 | 2.487223 | 6.57E-05 | 0.000126 |
| AL122008.3 | 0.014483 | 0.077007 | 2.410631 | 9.42E-08 | 2.75E-07 |
| LINC01136  | 0.03065  | 0.123036 | 2.005119 | 2.37E-13 | 1.48E-12 |
| UMODL1-AS1 | 0.915254 | 0.251538 | -1.86339 | 1.23E-07 | 3.50E-07 |
| ASMTL-AS1  | 1.285859 | 3.098389 | 1.268786 | 3.00E-05 | 6.00E-05 |
| AL158055.1 | 0.156964 | 0.066477 | -1.2395  | 6.90E-17 | 7.29E-16 |
| AC109779.1 | 0.077344 | 0.032944 | -1.23128 | 5.45E-12 | 2.87E-11 |
| AC002401.1 | 0.020558 | 0.084681 | 2.042346 | 5.40E-07 | 1.40E-06 |
| AC015712.1 | 0.138727 | 0.613406 | 2.144589 | 7.88E-14 | 5.25E-13 |
| AL161937.2 | 0.072369 | 0.261561 | 1.853715 | 3.10E-13 | 1.90E-12 |
| VAC14-AS1  | 0.019574 | 0.141122 | 2.849964 | 1.16E-17 | 1.38E-16 |
| AC133528.1 | 0.28108  | 0.56647  | 1.011017 | 0.00025  | 0.000438 |
| AC026765.2 | 0.036155 | 0.010376 | -1.80091 | 9.94E-12 | 5.07E-11 |
| LINC01206  | 0.000997 | 0.017113 | 4.101777 | 3.38E-06 | 7.78E-06 |

|                            |          |          |          |          |          |
|----------------------------|----------|----------|----------|----------|----------|
| AC145343.1                 | 0.221444 | 2.065506 | 3.22148  | 5.19E-29 | 4.89E-27 |
| AC010186.3                 | 0.966851 | 2.492182 | 1.366044 | 4.16E-11 | 1.94E-10 |
| AC114489.1                 | 0.013609 | 0.311029 | 4.514398 | 1.70E-10 | 7.19E-10 |
| AL360091.1                 | 0.164279 | 0.358539 | 1.125979 | 0.002309 | 0.003512 |
| AC073115.2                 | 0.030242 | 0.140734 | 2.218325 | 3.11E-05 | 6.20E-05 |
| LY6E-DT                    | 0.221208 | 0.497126 | 1.16821  | 0.005548 | 0.007951 |
| AC067945.3                 | 0.191078 | 0.415948 | 1.122239 | 3.04E-05 | 6.09E-05 |
| LINC01016                  | 0.024092 | 0.010992 | -1.13214 | 1.84E-10 | 7.72E-10 |
| AC011373.1                 | 0.050429 | 0.217517 | 2.108804 | 0.004074 | 0.005967 |
| LINC02346                  | 0.022959 | 0.003517 | -2.70659 | 1.00E-19 | 1.57E-18 |
| AC122710.2                 | 0.036665 | 0.178752 | 2.285496 | 6.88E-14 | 4.65E-13 |
| AC245014.1                 | 0.058099 | 0.116347 | 1.001864 | 0.003562 | 0.005269 |
| AC003986.2                 | 0.002942 | 0.030867 | 3.39137  | 9.51E-08 | 2.77E-07 |
| AC007773.1                 | 0.277986 | 0.894943 | 1.686783 | 1.49E-17 | 1.74E-16 |
| AC011330.2                 | 0.160342 | 0.353079 | 1.138839 | 1.18E-07 | 3.39E-07 |
| AL353611.1                 | 0.051065 | 0.008595 | -2.57077 | 8.14E-16 | 7.28E-15 |
| FBXL19-AS1                 | 0.479569 | 1.111157 | 1.212253 | 1.19E-10 | 5.16E-10 |
| AL355974.1                 | 0.045175 | 0.007445 | -2.6011  | 2.28E-12 | 1.26E-11 |
| AC090559.1                 | 4.404392 | 1.617631 | -1.44506 | 2.12E-23 | 5.45E-22 |
| AC005363.2                 | 0.05032  | 0.128987 | 1.358015 | 0.000327 | 0.000565 |
| AC116914.2                 | 0.741293 | 1.498221 | 1.015134 | 4.98E-09 | 1.71E-08 |
| AC008147.2                 | 0.047485 | 0.144032 | 1.600851 | 2.94E-05 | 5.89E-05 |
| LINC00656                  | 0.393582 | 0.038    | -3.37259 | 1.81E-30 | 2.64E-28 |
| AC147067.2                 | 1.822763 | 0.477954 | -1.93118 | 1.80E-24 | 5.75E-23 |
| STAG3L5P-PVRIG2P-<br>PILRB | 0.339149 | 0.694518 | 1.034092 | 1.35E-08 | 4.41E-08 |
| AL590666.3                 | 0.001769 | 0.021446 | 3.599578 | 2.06E-13 | 1.30E-12 |
| AC026391.1                 | 0.096933 | 0.014824 | -2.70906 | 6.70E-24 | 1.87E-22 |
| AP001046.1                 | 0.007104 | 0.023919 | 1.751415 | 3.53E-06 | 8.10E-06 |
| AC099509.1                 | 0.118578 | 1.860224 | 3.971573 | 1.10E-15 | 9.61E-15 |
| KTN1-AS1                   | 0.275314 | 0.589441 | 1.098271 | 6.69E-14 | 4.52E-13 |
| AC016245.1                 | 0.004934 | 0.028502 | 2.530361 | 0.001927 | 0.002974 |
| AL596223.1                 | 0.007042 | 0.107013 | 3.925663 | 6.83E-09 | 2.32E-08 |
| AC010999.2                 | 0.07147  | 0.155898 | 1.125185 | 0.000643 | 0.001066 |
| LINC02016                  | 3.561789 | 0.127354 | -4.80569 | 1.38E-33 | 6.11E-31 |
| ZNF337-AS1                 | 0.220618 | 0.486592 | 1.141158 | 5.20E-12 | 2.75E-11 |
| LINC00706                  | 0.018493 | 0.111304 | 2.589487 | 5.76E-05 | 0.000111 |
| LINC00968                  | 2.726315 | 0.257438 | -3.40466 | 3.20E-32 | 8.65E-30 |
| AC244093.5                 | 0.09621  | 0.264955 | 1.461492 | 3.08E-06 | 7.12E-06 |
| AC090833.1                 | 0.004924 | 0.062766 | 3.672005 | 7.01E-08 | 2.08E-07 |
| HOXC-AS1                   | 0.041661 | 0.4648   | 3.479842 | 1.95E-07 | 5.38E-07 |
| AC008875.1                 | 0.134059 | 0.613975 | 2.195313 | 2.66E-13 | 1.65E-12 |
| LINC00574                  | 0.037722 | 0.087609 | 1.215676 | 0.00017  | 0.000305 |
| ABCA9-AS1                  | 0.00768  | 0.097284 | 3.663047 | 0.005941 | 0.008469 |

|                |          |          |          |          |          |
|----------------|----------|----------|----------|----------|----------|
| AC104237.3     | 1.161525 | 0.109297 | -3.4097  | 8.85E-34 | 4.23E-31 |
| AC010149.1     | 0.105713 | 0.341754 | 1.692805 | 2.07E-08 | 6.61E-08 |
| AP006545.1     | 0.052635 | 0.152292 | 1.532751 | 7.38E-06 | 1.62E-05 |
| AP000851.1     | 0.025727 | 0.124501 | 2.274801 | 0.001257 | 0.001998 |
| LINC00472      | 0.769774 | 0.270069 | -1.51111 | 1.17E-26 | 5.82E-25 |
| AC105046.1     | 0.149978 | 0.032818 | -2.19217 | 1.12E-07 | 3.23E-07 |
| AC090739.1     | 0.39116  | 1.1974   | 1.614074 | 0.000724 | 0.001189 |
| AP000873.2     | 0.306497 | 0.748152 | 1.287461 | 2.20E-12 | 1.22E-11 |
| AC015726.1     | 2.451545 | 1.092461 | -1.16611 | 9.24E-19 | 1.28E-17 |
| AC055713.1     | 0.151563 | 0.481732 | 1.668317 | 2.89E-20 | 4.70E-19 |
| AP000864.1     | 0.021492 | 0.070733 | 1.718554 | 0.000279 | 0.000486 |
| AC074212.1     | 0.255897 | 0.514324 | 1.007115 | 9.53E-06 | 2.06E-05 |
| AC015923.1     | 0.024466 | 0.353643 | 3.85346  | 3.84E-05 | 7.59E-05 |
| AC011893.1     | 0.013978 | 0.049923 | 1.836588 | 3.00E-10 | 1.22E-09 |
| AP001596.2     | 0.089254 | 0.030409 | -1.55343 | 5.61E-08 | 1.69E-07 |
| LINC02086      | 0.018452 | 0.302892 | 4.036969 | 2.16E-10 | 8.98E-10 |
| AL353593.3     | 0.114384 | 0.367698 | 1.68464  | 0.015117 | 0.020199 |
| HLX-AS1        | 0.411783 | 0.08126  | -2.34126 | 3.69E-24 | 1.13E-22 |
| FAM198B-AS1    | 0.21566  | 0.457517 | 1.085065 | 0.026428 | 0.034038 |
| USP3-AS1       | 0.221785 | 0.476908 | 1.104547 | 1.09E-07 | 3.14E-07 |
| AC063965.1     | 0.197937 | 1.106291 | 2.482617 | 0.00673  | 0.009518 |
| AL365181.2     | 0.039389 | 1.620899 | 5.362847 | 5.48E-17 | 5.89E-16 |
| AC107081.2     | 0.207473 | 0.485756 | 1.227306 | 1.54E-08 | 4.99E-08 |
| AC123023.1     | 0.537165 | 0.126212 | -2.08951 | 2.23E-14 | 1.63E-13 |
| AC093110.1     | 10.04202 | 1.1877   | -3.07981 | 6.99E-31 | 1.17E-28 |
| AC011444.3     | 0.324713 | 0.100381 | -1.69369 | 6.74E-18 | 8.29E-17 |
| LINC01535      | 0.115415 | 0.549705 | 2.251833 | 1.11E-08 | 3.68E-08 |
| AL607028.1     | 0.034391 | 0.102031 | 1.568912 | 0.005046 | 0.007279 |
| SOX21-AS1      | 0.150239 | 0.751365 | 2.322251 | 0.006075 | 0.008651 |
| MAGEA10-MAGEA5 | 0.004797 | 0.067363 | 3.811617 | 1.42E-07 | 4.02E-07 |
| AC021016.2     | 2.681199 | 0.960927 | -1.48038 | 7.38E-30 | 8.19E-28 |
| USP30-AS1      | 4.131418 | 1.873172 | -1.14115 | 4.77E-17 | 5.18E-16 |
| AC087742.1     | 0.082572 | 0.197999 | 1.261765 | 1.46E-05 | 3.08E-05 |
| AC134312.1     | 0.139438 | 0.026751 | -2.38194 | 2.37E-21 | 4.45E-20 |
| AC104791.1     | 0.023182 | 0.098229 | 2.083146 | 0.002982 | 0.004464 |
| AC003070.2     | 0.399846 | 0.115694 | -1.78913 | 4.83E-22 | 9.85E-21 |
| AP000487.1     | 0.157733 | 0.350186 | 1.150632 | 6.33E-15 | 5.02E-14 |
| AL122019.1     | 0.004422 | 0.128809 | 4.864378 | 4.11E-09 | 1.43E-08 |
| AC006483.2     | 0.030634 | 0.07599  | 1.310661 | 0.008073 | 0.011283 |
| GS1-24F4.2     | 0.012327 | 0.061947 | 2.329175 | 0.000227 | 0.000402 |
| AC022150.4     | 0.423199 | 0.938663 | 1.149271 | 0.00293  | 0.004393 |
| AC005726.3     | 0.740426 | 1.731723 | 1.22578  | 2.16E-09 | 7.73E-09 |
| AL109910.2     | 0.020469 | 0.008123 | -1.33325 | 6.34E-12 | 3.31E-11 |
| PGM5-AS1       | 0.525044 | 0.117342 | -2.16172 | 3.03E-25 | 1.15E-23 |



|             |          |          |          |          |          |
|-------------|----------|----------|----------|----------|----------|
| LINC01397   | 0.018518 | 0.09673  | 2.38502  | 3.20E-07 | 8.59E-07 |
| LINC02407   | 0.108105 | 0.328537 | 1.603629 | 1.47E-09 | 5.41E-09 |
| AC068987.4  | 0.451786 | 1.170624 | 1.373567 | 0.019919 | 0.026203 |
| AC116021.1  | 0.03305  | 0.118636 | 1.843833 | 1.60E-05 | 3.34E-05 |
| AC009630.2  | 0.00334  | 0.02637  | 2.98083  | 5.87E-08 | 1.76E-07 |
| AC084125.4  | 0.151708 | 0.449985 | 1.568576 | 9.00E-11 | 3.97E-10 |
| AL365356.1  | 0.024037 | 0.323663 | 3.751167 | 0.003327 | 0.004943 |
| AL365356.5  | 0.016779 | 0.851753 | 5.665724 | 1.01E-24 | 3.40E-23 |
| AL354892.2  | 1.607149 | 3.36425  | 1.065781 | 3.46E-13 | 2.11E-12 |
| AC006213.3  | 0.108174 | 0.415918 | 1.94295  | 4.86E-07 | 1.28E-06 |
| AC004466.3  | 0.167897 | 0.529302 | 1.656512 | 1.08E-06 | 2.70E-06 |
| AL596218.1  | 0.063444 | 0.629407 | 3.310437 | 0.000186 | 0.000332 |
| FAM181A-AS1 | 0.317286 | 0.084784 | -1.90393 | 2.48E-17 | 2.77E-16 |
| AL445524.1  | 1.114097 | 7.902802 | 2.82649  | 7.04E-29 | 6.53E-27 |
| AC011445.2  | 0.322213 | 0.921374 | 1.51577  | 2.18E-08 | 6.95E-08 |
| AC068722.1  | 0.002319 | 0.039861 | 4.103324 | 8.18E-09 | 2.74E-08 |
| AC084262.1  | 0.010442 | 0.222609 | 4.41404  | 6.21E-14 | 4.23E-13 |
| NHEG1       | 0.039965 | 0.009131 | -2.12998 | 1.27E-11 | 6.38E-11 |
| AC120193.1  | 0.022149 | 0.132063 | 2.575925 | 4.06E-07 | 1.07E-06 |
| AL161618.1  | 1.138955 | 0.237956 | -2.25895 | 1.53E-12 | 8.70E-12 |
| HOXB-AS4    | 0.011591 | 0.279101 | 4.589674 | 1.40E-07 | 3.95E-07 |
| AC097658.2  | 0.040754 | 0.010649 | -1.93626 | 3.74E-12 | 2.02E-11 |
| AC104241.2  | 0.089185 | 0.028233 | -1.65944 | 2.83E-16 | 2.71E-15 |
| AC004884.2  | 0.097195 | 0.968177 | 3.316313 | 2.05E-12 | 1.14E-11 |
| AC011447.3  | 0.105527 | 0.395348 | 1.905511 | 0.008645 | 0.012019 |
| LINC01629   | 0.033712 | 0.43229  | 3.680661 | 9.74E-07 | 2.44E-06 |
| BLACAT1     | 0.223393 | 1.873126 | 3.06779  | 4.41E-22 | 9.08E-21 |
| AL359694.2  | 0.036777 | 0.097586 | 1.407866 | 0.019192 | 0.025263 |
| AC011503.2  | 0.240332 | 1.117157 | 2.216731 | 3.58E-19 | 5.26E-18 |
| GAS1RR      | 0.187003 | 0.076448 | -1.2905  | 1.28E-19 | 1.95E-18 |
| AC090921.1  | 0.027783 | 0.085193 | 1.616515 | 0.000212 | 0.000377 |
| C5orf64     | 0.051578 | 0.014146 | -1.86642 | 2.05E-23 | 5.31E-22 |
| AC079684.1  | 0.239144 | 0.806481 | 1.753761 | 6.17E-12 | 3.23E-11 |
| AL591178.1  | 1.164289 | 0.48987  | -1.24898 | 2.49E-10 | 1.03E-09 |
| AC067930.1  | 0.035955 | 0.09102  | 1.339992 | 0.001405 | 0.002215 |
| AC245884.11 | 0.110401 | 0.042295 | -1.38421 | 1.34E-14 | 1.00E-13 |
| AL034399.2  | 0.003171 | 0.102269 | 5.011512 | 1.56E-15 | 1.35E-14 |
| MGAT3-AS1   | 0.609082 | 0.107599 | -2.50098 | 5.69E-27 | 3.02E-25 |
| AF131215.5  | 2.481672 | 0.871447 | -1.50983 | 1.18E-22 | 2.68E-21 |
| SIRPG-AS1   | 0.015543 | 0.075806 | 2.286086 | 5.62E-07 | 1.45E-06 |
| AC006329.1  | 0.648086 | 3.087104 | 2.251996 | 6.50E-14 | 4.40E-13 |
| PRR7-AS1    | 0.125166 | 0.317012 | 1.340691 | 1.09E-06 | 2.70E-06 |
| ARHGEF7-AS2 | 0.020006 | 0.009875 | -1.0186  | 3.05E-06 | 7.08E-06 |
| AL354714.1  | 0.969028 | 0.067237 | -3.8492  | 2.91E-32 | 8.22E-30 |

|             |          |          |          |          |          |
|-------------|----------|----------|----------|----------|----------|
| L29074.1    | 0.014493 | 0.066276 | 2.193177 | 1.34E-05 | 2.84E-05 |
| AC026401.2  | 0.048471 | 0.165117 | 1.768301 | 0.00147  | 0.002306 |
| AL022324.3  | 0.003579 | 0.090218 | 4.655906 | 1.88E-11 | 9.24E-11 |
| AC006449.3  | 0.040233 | 0.156874 | 1.963171 | 5.09E-10 | 2.00E-09 |
| AL139099.2  | 0.167613 | 0.402517 | 1.263915 | 1.21E-08 | 3.98E-08 |
| AC004540.2  | 2.313609 | 0.646502 | -1.83942 | 2.32E-25 | 9.13E-24 |
| AL390037.1  | 0.041376 | 0.085448 | 1.046247 | 0.003926 | 0.005765 |
| AL132780.1  | 0.281996 | 0.579554 | 1.03927  | 2.53E-09 | 9.00E-09 |
| ANKRD10-IT1 | 5.091996 | 10.36725 | 1.02573  | 1.60E-06 | 3.88E-06 |
| LINC00173   | 0.123922 | 0.369831 | 1.577438 | 9.90E-08 | 2.87E-07 |
| AC005993.1  | 0.029602 | 0.990397 | 5.064257 | 1.58E-06 | 3.85E-06 |
| AL356108.1  | 0.019459 | 0.079893 | 2.037595 | 0.000324 | 0.00056  |
| ALG1L9P     | 0.158529 | 0.351838 | 1.150161 | 2.88E-15 | 2.41E-14 |
| AL513320.1  | 0.214248 | 0.630724 | 1.557725 | 8.06E-11 | 3.58E-10 |
| AC107959.1  | 0.827923 | 0.400357 | -1.04821 | 1.82E-22 | 3.99E-21 |
| AL359513.1  | 0.255402 | 0.667264 | 1.385487 | 8.67E-12 | 4.45E-11 |
| LINC00513   | 0.189588 | 1.142262 | 2.590951 | 0.000199 | 0.000355 |
| AL133370.1  | 0.026134 | 1.753739 | 6.068365 | 9.21E-08 | 2.69E-07 |
| LINC01269   | 0.179791 | 0.864434 | 2.265437 | 9.85E-12 | 5.03E-11 |
| AL139339.1  | 0.294135 | 0.146072 | -1.0098  | 5.23E-13 | 3.13E-12 |
| AC004672.1  | 0.006847 | 0.06425  | 3.230123 | 0.010895 | 0.01489  |
| AC104785.1  | 0.170783 | 0.346109 | 1.01906  | 8.95E-05 | 0.000168 |
| AC104984.1  | 0.734334 | 0.044191 | -4.05461 | 1.15E-29 | 1.21E-27 |
| AP000569.1  | 0.052132 | 0.151459 | 1.538672 | 1.36E-07 | 3.86E-07 |
| AL590723.1  | 0.262469 | 0.732295 | 1.480278 | 1.69E-06 | 4.09E-06 |
| LINC01597   | 0.040827 | 0.637357 | 3.964523 | 7.35E-10 | 2.84E-09 |
| AC083973.1  | 0.012219 | 0.092213 | 2.915868 | 7.88E-12 | 4.08E-11 |
| AP003170.3  | 0.342567 | 0.757673 | 1.145187 | 0.001539 | 0.002407 |
| LINC01166   | 0.082771 | 0.017926 | -2.20707 | 3.47E-21 | 6.42E-20 |
| AL355388.2  | 0.167731 | 0.487206 | 1.538378 | 7.56E-15 | 5.92E-14 |
| LINC02475   | 0.012784 | 0.257439 | 4.331861 | 9.58E-11 | 4.22E-10 |
| AL590004.3  | 0.047614 | 0.331748 | 2.800639 | 4.44E-08 | 1.36E-07 |
| LNK1-AS2    | 0.022659 | 0.123538 | 2.446818 | 2.10E-11 | 1.03E-10 |
| AQP4-AS1    | 0.162674 | 0.074249 | -1.13154 | 2.98E-10 | 1.21E-09 |
| STEAP2-AS1  | 0.008246 | 0.112442 | 3.769342 | 4.79E-14 | 3.32E-13 |
| CASC16      | 0.006397 | 0.160449 | 4.648517 | 5.83E-15 | 4.64E-14 |
| AL365259.1  | 0.052771 | 0.021891 | -1.26944 | 8.24E-13 | 4.82E-12 |
| DENND5B-AS1 | 0.027423 | 0.09431  | 1.782055 | 1.43E-05 | 3.02E-05 |
| AC126323.6  | 0.008122 | 0.095329 | 3.552979 | 1.69E-07 | 4.72E-07 |
| AC048383.1  | 0.013588 | 0.108068 | 2.991573 | 8.64E-06 | 1.88E-05 |
| AC072062.1  | 0.004987 | 0.045491 | 3.189223 | 6.27E-10 | 2.44E-09 |
| PGM5P3-AS1  | 0.176847 | 0.064762 | -1.44928 | 1.24E-19 | 1.88E-18 |
| AC008115.3  | 0.535431 | 1.547125 | 1.530817 | 1.38E-13 | 8.87E-13 |
| AC016590.2  | 0.214896 | 0.66624  | 1.632405 | 0.001071 | 0.001721 |

|             |          |          |          |          |          |
|-------------|----------|----------|----------|----------|----------|
| AL022322.1  | 0.266689 | 1.091306 | 2.032826 | 2.73E-12 | 1.50E-11 |
| AL158063.1  | 0.118833 | 0.243563 | 1.03536  | 0.000178 | 0.000319 |
| AC087241.3  | 0.016961 | 0.037288 | 1.13653  | 0.021258 | 0.027823 |
| AC010320.3  | 0.140606 | 0.312823 | 1.153693 | 8.01E-05 | 0.000152 |
| MIR31HG     | 0.053372 | 0.583939 | 3.451654 | 2.44E-05 | 4.96E-05 |
| AL139420.1  | 0.005385 | 0.170349 | 4.983338 | 3.50E-15 | 2.89E-14 |
| AC009121.1  | 0.032824 | 0.198142 | 2.593717 | 3.42E-17 | 3.78E-16 |
| LINC00853   | 0.475149 | 1.207062 | 1.345048 | 2.77E-10 | 1.13E-09 |
| LINC00637   | 0.022459 | 0.063619 | 1.502131 | 8.39E-07 | 2.12E-06 |
| AC044810.2  | 0.414604 | 0.048014 | -3.1102  | 2.03E-30 | 2.81E-28 |
| AC008040.1  | 0.006494 | 0.017506 | 1.430597 | 1.16E-05 | 2.48E-05 |
| MAP3K14-AS1 | 0.576634 | 1.3313   | 1.207107 | 3.77E-18 | 4.78E-17 |
| AC093248.1  | 0.031406 | 0.088425 | 1.493438 | 0.019489 | 0.025648 |
| AL136084.2  | 0.018014 | 0.058432 | 1.697685 | 2.02E-10 | 8.42E-10 |
| AC024560.3  | 0.264449 | 0.551473 | 1.060302 | 1.55E-05 | 3.25E-05 |
| AL591846.2  | 0.151394 | 0.370107 | 1.289634 | 5.52E-08 | 1.66E-07 |
| AL121772.1  | 0.122552 | 0.531053 | 2.115466 | 4.57E-13 | 2.75E-12 |
| AC092546.1  | 0.015799 | 0.047607 | 1.59135  | 0.000673 | 0.001111 |
| AC245884.1  | 0.016766 | 0.049765 | 1.569617 | 0.000866 | 0.001411 |
| AC089983.1  | 0.039103 | 0.9418   | 4.590069 | 1.54E-14 | 1.14E-13 |
| AC079089.1  | 0.018366 | 0.205816 | 3.486241 | 1.90E-20 | 3.15E-19 |
| C22orf34    | 0.612608 | 0.297464 | -1.04225 | 1.30E-18 | 1.75E-17 |
| AC096921.2  | 1.887184 | 0.607197 | -1.636   | 4.92E-27 | 2.66E-25 |
| AC244100.3  | 0.047413 | 0.019283 | -1.29797 | 0.000559 | 0.000938 |
| AL359880.1  | 0.043963 | 0.253865 | 2.529695 | 0.014358 | 0.019259 |
| PACRG-AS3   | 0.142184 | 0.016765 | -3.08421 | 3.36E-30 | 4.32E-28 |
| AC040174.1  | 0.002264 | 0.061356 | 4.760362 | 4.01E-07 | 1.06E-06 |
| AC113146.1  | 0.009599 | 0.10809  | 3.493222 | 0.00271  | 0.004082 |
| SPRY4-AS1   | 0.248242 | 0.522587 | 1.073926 | 1.47E-05 | 3.10E-05 |
| AC253536.6  | 0.28747  | 0.638146 | 1.150474 | 4.17E-09 | 1.44E-08 |
| POT1-AS1    | 0.079103 | 0.236701 | 1.581265 | 6.66E-09 | 2.26E-08 |
| AL589765.5  | 0.175071 | 0.354985 | 1.019819 | 1.06E-06 | 2.65E-06 |
| STAU2-AS1   | 0.062621 | 0.305864 | 2.288164 | 1.76E-15 | 1.51E-14 |
| AC128707.1  | 0.046099 | 0.007628 | -2.59532 | 6.17E-15 | 4.90E-14 |
| AC008403.3  | 0.045817 | 0.164271 | 1.842113 | 8.98E-08 | 2.62E-07 |
| AC083806.2  | 0.030175 | 0.147052 | 2.28492  | 8.39E-06 | 1.83E-05 |
| TARID       | 0.391447 | 0.167372 | -1.22576 | 4.36E-21 | 7.93E-20 |
| SPANXA2-OT1 | 0.014375 | 0.053185 | 1.887406 | 0.000386 | 0.00066  |
| LINC01977   | 0.030719 | 0.994141 | 5.016249 | 4.20E-30 | 4.92E-28 |
| AC012157.1  | 0.076589 | 0.176434 | 1.203916 | 0.002773 | 0.00417  |
| AC034238.1  | 0.015257 | 0.040744 | 1.417108 | 0.001344 | 0.002125 |
| AC005165.1  | 0.522807 | 0.25823  | -1.01762 | 1.01E-14 | 7.66E-14 |
| SH3RF3-AS1  | 0.881971 | 0.397112 | -1.15119 | 6.49E-16 | 5.87E-15 |
| AC022075.1  | 0.258923 | 0.76906  | 1.570571 | 8.35E-07 | 2.11E-06 |

|            |          |          |          |          |          |
|------------|----------|----------|----------|----------|----------|
| AC100774.1 | 0.012619 | 0.160275 | 3.666829 | 0.000129 | 0.000237 |
| AP001062.2 | 0.061345 | 0.213631 | 1.800108 | 9.96E-05 | 0.000186 |
| AC024361.1 | 0.365441 | 1.042916 | 1.512912 | 1.55E-10 | 6.61E-10 |
| AC078923.1 | 0.020664 | 0.38402  | 4.21596  | 3.19E-15 | 2.65E-14 |
| LINC01449  | 0.006263 | 0.035254 | 2.492962 | 4.36E-08 | 1.34E-07 |
| AL161740.1 | 0.271085 | 0.030951 | -3.13068 | 6.08E-23 | 1.45E-21 |
| AC021127.1 | 0.019076 | 0.106719 | 2.484011 | 7.18E-06 | 1.58E-05 |
| AP001646.3 | 0.120564 | 0.049896 | -1.27279 | 8.53E-08 | 2.50E-07 |
| LINC02245  | 0.007465 | 0.029111 | 1.963298 | 3.34E-08 | 1.04E-07 |
| AP002754.1 | 0.031736 | 0.199565 | 2.652665 | 2.70E-06 | 6.32E-06 |
| AC026369.1 | 0.085754 | 0.026509 | -1.69372 | 7.97E-22 | 1.57E-20 |
| LINC02397  | 0.020442 | 0.055291 | 1.435552 | 1.57E-07 | 4.41E-07 |
| LINC01927  | 0.232966 | 0.068459 | -1.76679 | 2.37E-08 | 7.51E-08 |
| AC093334.1 | 0.04577  | 0.022734 | -1.00952 | 1.57E-07 | 4.40E-07 |
| AC011352.1 | 0.002232 | 0.07916  | 5.148584 | 2.05E-11 | 1.00E-10 |
| ZNF571-AS1 | 0.09104  | 0.359625 | 1.981918 | 1.44E-05 | 3.04E-05 |
| AC078906.1 | 0.014955 | 0.073998 | 2.30685  | 0.000233 | 0.000412 |
| AP005230.1 | 0.014058 | 0.237937 | 4.081149 | 5.89E-14 | 4.02E-13 |
| VIPR1-AS1  | 0.517456 | 0.237303 | -1.1247  | 2.69E-09 | 9.53E-09 |
| AC025043.1 | 0.103997 | 0.24018  | 1.207583 | 0.010904 | 0.014898 |
| LINC01290  | 1.941611 | 0.476029 | -2.02813 | 3.55E-25 | 1.31E-23 |
| AC010148.1 | 0.03505  | 0.132723 | 1.920916 | 7.33E-09 | 2.48E-08 |
| LEMD1-AS1  | 0.017265 | 0.105807 | 2.615492 | 6.49E-09 | 2.21E-08 |
| AP003973.2 | 0.227956 | 0.098005 | -1.21783 | 9.68E-11 | 4.27E-10 |
| AC027288.3 | 5.220423 | 0.620427 | -3.07283 | 3.40E-30 | 4.32E-28 |
| AL121904.1 | 0.017812 | 0.284024 | 3.995102 | 7.50E-05 | 0.000142 |
| AC027801.4 | 0.079649 | 0.263667 | 1.726986 | 4.76E-07 | 1.25E-06 |
| AC024581.1 | 0.00688  | 0.067201 | 3.287942 | 3.06E-07 | 8.22E-07 |
| FUT8-AS1   | 0.208004 | 0.628031 | 1.594224 | 5.60E-16 | 5.09E-15 |
| LINC02594  | 0.014503 | 0.17154  | 3.564103 | 2.64E-09 | 9.37E-09 |
| AC016987.2 | 0.140275 | 0.028575 | -2.29541 | 8.58E-17 | 8.95E-16 |
| AC048382.2 | 0.355159 | 0.781257 | 1.137332 | 5.06E-06 | 1.14E-05 |
| LINC00427  | 0.050523 | 0.173922 | 1.783427 | 0.007671 | 0.010756 |
| SMC2-AS1   | 0.113519 | 0.053325 | -1.09005 | 6.25E-12 | 3.27E-11 |
| AC007546.1 | 0.303273 | 0.631856 | 1.05898  | 0.000946 | 0.00153  |
| AL109614.1 | 0.311598 | 0.706297 | 1.180588 | 0.003897 | 0.005726 |
| AL160291.1 | 0.01426  | 0.046326 | 1.699824 | 2.98E-07 | 8.04E-07 |
| AC010776.3 | 0.481655 | 0.036127 | -3.73685 | 4.54E-40 | 2.82E-36 |
| TMEM78     | 0.001653 | 0.014938 | 3.175538 | 1.87E-09 | 6.78E-09 |
| AC090772.1 | 0.075399 | 0.349867 | 2.214189 | 1.05E-09 | 3.95E-09 |
| AC108174.1 | 0.009752 | 0.069243 | 2.827858 | 2.62E-05 | 5.30E-05 |
| AL352984.1 | 0.016868 | 0.362205 | 4.424474 | 1.68E-15 | 1.45E-14 |
| WASHC5-AS1 | 0.132204 | 0.409262 | 1.630261 | 7.90E-08 | 2.34E-07 |
| AL162574.1 | 0.042997 | 0.01663  | -1.37042 | 1.37E-08 | 4.47E-08 |

|            |          |          |          |          |          |
|------------|----------|----------|----------|----------|----------|
| AC008667.1 | 0.020482 | 0.096667 | 2.238674 | 6.85E-05 | 0.000131 |
| AC107032.2 | 0.226501 | 0.478987 | 1.08047  | 1.62E-07 | 4.54E-07 |
| AC073333.1 | 0.147857 | 0.445157 | 1.590113 | 1.03E-07 | 2.99E-07 |
| LINC00592  | 0.059524 | 0.255928 | 2.104199 | 2.23E-07 | 6.11E-07 |
| AP001429.1 | 0.077535 | 0.81593  | 3.395526 | 1.03E-07 | 2.97E-07 |
| AP002957.1 | 0.010034 | 0.223585 | 4.477791 | 7.95E-18 | 9.68E-17 |
| AC025766.1 | 0.12733  | 0.51696  | 2.021483 | 4.78E-14 | 3.32E-13 |
| AC026740.1 | 0.512995 | 1.457895 | 1.506872 | 2.09E-09 | 7.49E-09 |
| LINC02387  | 0.027318 | 0.325293 | 3.573805 | 2.47E-09 | 8.77E-09 |
| LINC01607  | 0.191782 | 1.186732 | 2.629456 | 1.86E-21 | 3.52E-20 |
| LINC02213  | 0.033981 | 0.010907 | -1.63939 | 2.82E-12 | 1.54E-11 |
| AL136526.1 | 0.020436 | 0.048344 | 1.242236 | 0.019189 | 0.025263 |
| LINC01827  | 0.611485 | 0.162826 | -1.90899 | 2.54E-18 | 3.29E-17 |
| AC087477.5 | 0.109784 | 0.04615  | -1.25026 | 4.96E-12 | 2.63E-11 |
| AC006504.1 | 0.112646 | 0.30728  | 1.447754 | 0.005034 | 0.007263 |
| LINC01511  | 0.012033 | 0.643462 | 5.740814 | 2.99E-06 | 6.95E-06 |
| AC105137.2 | 0.051702 | 0.215979 | 2.062589 | 3.63E-16 | 3.43E-15 |
| AL034550.1 | 0.169342 | 0.387932 | 1.195865 | 1.31E-06 | 3.21E-06 |
| AC004253.1 | 0.4523   | 1.046341 | 1.210001 | 8.94E-09 | 2.98E-08 |
| FAM242C    | 0.018444 | 0.069325 | 1.910234 | 4.89E-07 | 1.28E-06 |
| LINC02449  | 0.362794 | 0.739154 | 1.026724 | 0.000131 | 0.00024  |
| CR559946.1 | 0.022821 | 0.072743 | 1.672457 | 1.70E-06 | 4.11E-06 |
| FENDRR     | 9.354303 | 0.648816 | -3.84975 | 7.85E-32 | 1.95E-29 |
| LINC00866  | 0.047358 | 0.378316 | 2.997918 | 3.89E-15 | 3.18E-14 |
| AL391845.2 | 0.017497 | 0.084863 | 2.278059 | 9.55E-16 | 8.42E-15 |
| AC092436.4 | 0.064294 | 0.385217 | 2.582904 | 2.73E-05 | 5.51E-05 |
| AC009093.1 | 0.071698 | 0.200866 | 1.48624  | 3.24E-07 | 8.68E-07 |
| AC018647.1 | 0.553424 | 0.094286 | -2.55326 | 1.41E-29 | 1.44E-27 |
| AC090912.1 | 0.134036 | 0.37572  | 1.487034 | 2.99E-10 | 1.22E-09 |
| AC118755.2 | 0.100032 | 0.204327 | 1.030411 | 0.0006   | 0.001002 |
| AL355472.4 | 0.077836 | 0.308681 | 1.987603 | 1.74E-09 | 6.36E-09 |
| AL731557.1 | 0.324325 | 0.091801 | -1.82086 | 1.86E-22 | 4.06E-21 |
| UTAT33     | 0.195325 | 0.497592 | 1.349084 | 2.46E-10 | 1.02E-09 |
| AP001605.1 | 0.004479 | 0.014082 | 1.652502 | 0.00829  | 0.011553 |
| AC025048.1 | 0.270559 | 0.047974 | -2.49561 | 3.99E-23 | 9.81E-22 |
| AP002989.1 | 0.02203  | 0.055571 | 1.334837 | 0.013979 | 0.018807 |
| AC245041.2 | 4.209781 | 0.761215 | -2.46737 | 3.93E-28 | 2.81E-26 |
| AC010894.3 | 0.024605 | 0.255555 | 3.376615 | 0.003922 | 0.00576  |
| AL158847.1 | 0.209818 | 0.051581 | -2.02423 | 5.39E-24 | 1.58E-22 |
| AC063944.1 | 0.10161  | 0.042816 | -1.24684 | 6.50E-24 | 1.83E-22 |
| AC006480.2 | 0.223275 | 0.468316 | 1.068663 | 8.69E-05 | 0.000164 |
| AC027796.4 | 0.492855 | 1.287118 | 1.384909 | 2.63E-08 | 8.28E-08 |
| AC025259.1 | 0.030051 | 0.011649 | -1.36716 | 3.60E-07 | 9.61E-07 |
| LINC02330  | 0.054396 | 0.006276 | -3.11547 | 1.84E-27 | 1.10E-25 |

|               |          |          |          |          |          |
|---------------|----------|----------|----------|----------|----------|
| LINC01389     | 0.244021 | 0.780146 | 1.676738 | 3.37E-13 | 2.06E-12 |
| KCNQ1OT1      | 0.047336 | 0.264635 | 2.482988 | 3.06E-06 | 7.09E-06 |
| GSEC          | 0.49524  | 1.321187 | 1.415635 | 1.91E-16 | 1.88E-15 |
| AC005332.5    | 1.504278 | 3.098266 | 1.042389 | 4.37E-06 | 9.92E-06 |
| AC020658.4    | 0.006539 | 0.054154 | 3.049946 | 9.06E-10 | 3.44E-09 |
| LINC01031     | 0.222853 | 0.070973 | -1.65075 | 1.46E-18 | 1.95E-17 |
| AL034417.2    | 0.098576 | 0.35203  | 1.836391 | 5.55E-14 | 3.81E-13 |
| LINC01833     | 0.004265 | 0.451799 | 6.726961 | 2.37E-16 | 2.29E-15 |
| AC006252.1    | 0.144243 | 0.345408 | 1.259805 | 4.77E-14 | 3.31E-13 |
| AC245014.3    | 0.181356 | 0.586575 | 1.693489 | 0.00561  | 0.008029 |
| AC048341.2    | 0.688969 | 2.548901 | 1.887365 | 1.34E-14 | 1.00E-13 |
| ADAMTS9-AS1   | 0.71696  | 0.194687 | -1.88074 | 7.06E-28 | 4.67E-26 |
| AL354993.1    | 0.018442 | 0.108637 | 2.558418 | 0.002114 | 0.003236 |
| AL118511.1    | 0.29756  | 0.640561 | 1.106153 | 1.80E-09 | 6.55E-09 |
| AC009097.2    | 0.039072 | 0.190084 | 2.282444 | 1.39E-10 | 5.98E-10 |
| AL645608.8    | 0.029804 | 0.579867 | 4.282147 | 1.56E-22 | 3.46E-21 |
| AL080317.1    | 1.277974 | 2.834727 | 1.149351 | 1.63E-12 | 9.24E-12 |
| LINC01985     | 0.43136  | 0.075095 | -2.5221  | 8.35E-28 | 5.41E-26 |
| AL596442.2    | 0.81158  | 0.393914 | -1.04285 | 3.86E-15 | 3.16E-14 |
| AC243547.1    | 0.033679 | 0.131247 | 1.962384 | 8.86E-08 | 2.59E-07 |
| LINC00479     | 0.023979 | 0.066971 | 1.481734 | 0.002899 | 0.004347 |
| LINC00707     | 0.021755 | 0.513633 | 4.561287 | 1.45E-09 | 5.34E-09 |
| AL596223.2    | 0.052005 | 0.194415 | 1.902424 | 9.70E-07 | 2.43E-06 |
| AC092681.3    | 0.015924 | 0.062895 | 1.981736 | 0.003596 | 0.005314 |
| AC137767.1    | 0.165494 | 0.344156 | 1.056282 | 2.47E-07 | 6.72E-07 |
| AC008894.1    | 0.077642 | 0.023295 | -1.73684 | 1.42E-10 | 6.07E-10 |
| AC138625.1    | 0.042863 | 0.122278 | 1.512357 | 0.006472 | 0.009191 |
| FOX2-AS1      | 0.551077 | 1.909435 | 1.79282  | 1.08E-25 | 4.52E-24 |
| AL096828.3    | 0.237988 | 1.08768  | 2.19229  | 1.20E-23 | 3.21E-22 |
| AC005697.2    | 0.009455 | 0.01898  | 1.005348 | 0.016133 | 0.021459 |
| SLC5A4-AS1    | 0.07752  | 0.181064 | 1.223863 | 0.005251 | 0.007563 |
| AC025580.3    | 0.009266 | 0.021544 | 1.217243 | 0.018292 | 0.024134 |
| AC079906.1    | 0.032388 | 0.080764 | 1.318246 | 9.62E-06 | 2.08E-05 |
| KIZ-AS1       | 0.014825 | 0.067882 | 2.195041 | 4.77E-06 | 1.08E-05 |
| AL445483.1    | 0.15168  | 0.394996 | 1.380807 | 0.000163 | 0.000293 |
| AC007953.1    | 0.076082 | 0.293001 | 1.945281 | 0.000368 | 0.000632 |
| AL445183.2    | 0.034583 | 0.419854 | 3.601739 | 9.96E-06 | 2.15E-05 |
| AL161645.1    | 0.023757 | 0.100429 | 2.079735 | 0.000164 | 0.000295 |
| AL354719.2    | 0.121193 | 2.097003 | 4.112949 | 4.07E-22 | 8.47E-21 |
| AC023906.5    | 0.165999 | 0.379188 | 1.191739 | 8.32E-05 | 0.000157 |
| BX005040.1    | 0.200806 | 0.041073 | -2.28956 | 1.04E-12 | 6.02E-12 |
| U62317.3      | 0.08833  | 0.202797 | 1.199067 | 8.93E-07 | 2.25E-06 |
| DKFZp779M0652 | 0.631019 | 0.310569 | -1.02277 | 7.23E-16 | 6.50E-15 |
| AC090204.1    | 2.337052 | 4.798072 | 1.037765 | 0.000119 | 0.000219 |

|             |          |          |          |          |          |
|-------------|----------|----------|----------|----------|----------|
| NADK2-AS1   | 0.201127 | 0.521532 | 1.374648 | 0.020489 | 0.026902 |
| AP000866.6  | 0.31304  | 0.721404 | 1.20446  | 0.024079 | 0.031232 |
| AL354710.2  | 0.025917 | 0.065256 | 1.332214 | 0.005681 | 0.008125 |
| AL031651.2  | 0.113594 | 0.249597 | 1.135711 | 0.000124 | 0.000228 |
| AC002306.1  | 0.020756 | 0.084254 | 2.021251 | 0.004193 | 0.006124 |
| AC082651.3  | 0.163989 | 0.070478 | -1.21836 | 4.35E-12 | 2.33E-11 |
| AC104699.1  | 0.282073 | 1.474172 | 2.385764 | 9.74E-13 | 5.66E-12 |
| AC023157.3  | 0.941089 | 2.371772 | 1.333562 | 5.65E-15 | 4.51E-14 |
| LINC01484   | 0.093489 | 0.377457 | 2.013445 | 1.06E-09 | 3.98E-09 |
| TMEM147-AS1 | 0.73715  | 1.65541  | 1.167159 | 3.03E-12 | 1.65E-11 |
| AC243654.3  | 0.039593 | 0.097457 | 1.299503 | 5.60E-05 | 0.000108 |
| AP001432.1  | 0.313828 | 0.653474 | 1.058155 | 5.09E-09 | 1.75E-08 |
| AL133243.2  | 0.428754 | 1.31283  | 1.614457 | 5.51E-13 | 3.27E-12 |
| NARF-AS1    | 0.057653 | 0.236391 | 2.035712 | 3.15E-13 | 1.93E-12 |
| TTL10-AS1   | 0.197508 | 0.098223 | -1.00779 | 5.19E-07 | 1.35E-06 |
| SEMA6A-AS2  | 0.151779 | 0.035048 | -2.11458 | 1.04E-17 | 1.25E-16 |
| AC073957.3  | 0.347906 | 1.115603 | 1.681055 | 5.49E-11 | 2.51E-10 |
| AC019118.1  | 0.026124 | 0.090976 | 1.800085 | 0.001087 | 0.001746 |
| AC016999.1  | 0.069726 | 0.186357 | 1.418307 | 0.000153 | 0.000277 |
| TMPO-AS1    | 0.24474  | 0.810284 | 1.727176 | 8.55E-24 | 2.35E-22 |
| AC006947.1  | 0.044069 | 0.126248 | 1.518433 | 0.015409 | 0.020554 |
| AC016065.1  | 0.666184 | 1.401075 | 1.072541 | 9.77E-18 | 1.17E-16 |
| AL928654.2  | 1.410171 | 3.048322 | 1.112145 | 2.43E-07 | 6.65E-07 |
| AC010336.1  | 0.009881 | 0.024068 | 1.284415 | 5.04E-06 | 1.13E-05 |
| LINC01033   | 0.036246 | 0.015739 | -1.20345 | 0.002532 | 0.003833 |
| AC113349.1  | 1.228396 | 0.352799 | -1.79986 | 2.03E-11 | 9.94E-11 |
| LINC00346   | 0.42202  | 1.154662 | 1.452087 | 6.53E-06 | 1.44E-05 |
| AC008750.3  | 0.026655 | 0.127011 | 2.252489 | 6.87E-07 | 1.75E-06 |
| AC018410.2  | 0.195348 | 0.421715 | 1.110225 | 0.017848 | 0.023589 |
| AC083880.1  | 0.211811 | 0.72367  | 1.772553 | 3.64E-16 | 3.43E-15 |
| PTENP1-AS   | 0.075019 | 0.033372 | -1.16862 | 1.21E-09 | 4.53E-09 |
| AC006111.2  | 0.187004 | 0.515062 | 1.461672 | 4.47E-11 | 2.07E-10 |
| LINC00665   | 0.63998  | 3.548814 | 2.471239 | 1.05E-13 | 6.88E-13 |
| AL592071.1  | 0.083801 | 0.210942 | 1.331806 | 5.58E-07 | 1.44E-06 |
| AC007182.1  | 0.183346 | 0.032263 | -2.50664 | 7.91E-25 | 2.70E-23 |
| AC021066.1  | 0.035195 | 0.154345 | 2.132716 | 4.38E-07 | 1.15E-06 |
| Z94721.2    | 0.012911 | 0.072081 | 2.480987 | 2.93E-12 | 1.60E-11 |
| AC108097.1  | 0.183564 | 0.083032 | -1.14454 | 1.31E-05 | 2.79E-05 |
| FGF10-AS1   | 0.079755 | 0.011112 | -2.84345 | 2.85E-28 | 2.16E-26 |
| LINC01978   | 0.028915 | 0.120042 | 2.053656 | 3.29E-11 | 1.56E-10 |
| LINC01342   | 0.046401 | 0.129116 | 1.476439 | 0.000357 | 0.000614 |
| AC135178.1  | 0.249945 | 0.077615 | -1.6872  | 7.85E-15 | 6.10E-14 |
| AP004608.1  | 0.119445 | 1.024555 | 3.100582 | 2.31E-06 | 5.47E-06 |
| AC079467.1  | 5.61371  | 1.35321  | -2.05257 | 1.56E-21 | 3.00E-20 |

|              |          |          |          |          |          |
|--------------|----------|----------|----------|----------|----------|
| AP005271.1   | 0.030324 | 0.160581 | 2.404764 | 1.19E-06 | 2.94E-06 |
| BX255923.2   | 0.002788 | 0.009094 | 1.70577  | 5.37E-05 | 0.000104 |
| LINC02560    | 0.408806 | 3.619529 | 3.146315 | 2.43E-13 | 1.51E-12 |
| LINC01798    | 0.141563 | 0.066105 | -1.09862 | 3.95E-16 | 3.69E-15 |
| LINC02227    | 0.004534 | 0.019399 | 2.097213 | 2.91E-07 | 7.86E-07 |
| LINC00639    | 0.31391  | 0.147727 | -1.08742 | 1.13E-11 | 5.73E-11 |
| AC091057.1   | 0.196863 | 0.592913 | 1.590626 | 1.31E-17 | 1.55E-16 |
| AC114730.1   | 0.019622 | 0.045383 | 1.209654 | 0.001701 | 0.002647 |
| AC116036.2   | 0.264409 | 0.675684 | 1.353577 | 1.78E-07 | 4.96E-07 |
| RUNDC3A-AS1  | 0.022559 | 0.357183 | 3.984897 | 1.56E-28 | 1.31E-26 |
| AL132657.1   | 0.256923 | 0.535305 | 1.059026 | 2.28E-06 | 5.39E-06 |
| AL592494.3   | 0.166153 | 0.627944 | 1.918125 | 6.91E-10 | 2.68E-09 |
| AC007639.1   | 0.012345 | 0.284233 | 4.525033 | 2.88E-20 | 4.70E-19 |
| LINC01917    | 0.045677 | 0.01692  | -1.43273 | 8.39E-10 | 3.20E-09 |
| AC090844.3   | 0.159869 | 0.0372   | -2.10352 | 9.32E-07 | 2.34E-06 |
| Z94160.1     | 0.00578  | 0.03582  | 2.631513 | 4.39E-05 | 8.62E-05 |
| AC078820.1   | 0.029677 | 0.328203 | 3.467159 | 1.30E-09 | 4.84E-09 |
| AC090578.2   | 0.01142  | 0.175363 | 3.940659 | 2.68E-06 | 6.29E-06 |
| AC009127.1   | 0.029038 | 0.075997 | 1.387998 | 0.005421 | 0.007788 |
| CHL1-AS1     | 0.015152 | 0.123162 | 3.023    | 4.62E-06 | 1.05E-05 |
| NCBP2-AS1    | 0.233637 | 0.519187 | 1.151986 | 5.11E-07 | 1.33E-06 |
| AC008771.1   | 2.974224 | 6.052966 | 1.025129 | 4.28E-18 | 5.39E-17 |
| AL159169.3   | 0.161631 | 0.489098 | 1.597415 | 0.005585 | 0.007996 |
| AC010976.1   | 0.183694 | 0.383776 | 1.062961 | 0.000706 | 0.001162 |
| AC139887.4   | 0.483593 | 1.131589 | 1.226484 | 0.022812 | 0.029694 |
| KC877392.1   | 0.286773 | 0.059058 | -2.2797  | 2.95E-17 | 3.28E-16 |
| AC008764.6   | 0.224238 | 0.515652 | 1.201367 | 5.54E-13 | 3.29E-12 |
| AC018653.3   | 0.601181 | 1.481195 | 1.300889 | 1.20E-10 | 5.21E-10 |
| AC087878.1   | 0.036362 | 0.127773 | 1.813082 | 0.00243  | 0.003688 |
| AC012645.3   | 0.268465 | 0.643391 | 1.26096  | 3.85E-08 | 1.19E-07 |
| TAF1A-AS1    | 0.501014 | 1.142276 | 1.188988 | 5.00E-15 | 4.03E-14 |
| MINCR        | 1.190726 | 2.520637 | 1.081947 | 6.13E-12 | 3.21E-11 |
| AC092667.1   | 0.109489 | 0.044865 | -1.28712 | 3.93E-20 | 6.36E-19 |
| SEMA3B-AS1   | 2.695099 | 1.281502 | -1.0725  | 1.84E-17 | 2.11E-16 |
| AC004817.3   | 0.029772 | 0.128555 | 2.110356 | 0.000253 | 0.000444 |
| AC091588.3   | 0.700025 | 0.196914 | -1.82984 | 1.01E-20 | 1.73E-19 |
| AC023590.1   | 0.086655 | 0.431357 | 2.315519 | 0.000157 | 0.000284 |
| AC232271.1   | 0.398849 | 0.84641  | 1.085512 | 1.15E-08 | 3.80E-08 |
| AC108451.2   | 0.047118 | 0.783067 | 4.054772 | 1.41E-05 | 2.97E-05 |
| AC129507.4   | 0.274305 | 3.30013  | 3.588671 | 5.04E-05 | 9.82E-05 |
| DLX6-AS1     | 0.003706 | 0.117821 | 4.990542 | 2.33E-10 | 9.63E-10 |
| AC011773.4   | 0.027465 | 0.091508 | 1.736305 | 6.64E-07 | 1.70E-06 |
| AC010307.2   | 0.039062 | 0.17946  | 2.199813 | 4.92E-06 | 1.11E-05 |
| KIAA1614-AS1 | 0.024473 | 0.070317 | 1.522711 | 1.17E-06 | 2.90E-06 |



|               |          |          |          |          |          |
|---------------|----------|----------|----------|----------|----------|
| LINC02576     | 0.096501 | 0.532803 | 2.464989 | 5.77E-18 | 7.15E-17 |
| FRMD6-AS1     | 0.079761 | 0.210351 | 1.399044 | 8.52E-07 | 2.15E-06 |
| AC107959.2    | 0.011663 | 0.029691 | 1.348153 | 0.000641 | 0.001065 |
| AP000695.1    | 0.223884 | 0.697765 | 1.639992 | 1.26E-10 | 5.47E-10 |
| AL021026.1    | 0.180342 | 0.086621 | -1.05795 | 1.21E-13 | 7.84E-13 |
| HPAT5         | 0.035241 | 0.013669 | -1.36637 | 2.35E-06 | 5.56E-06 |
| AC017002.3    | 0.142479 | 0.343568 | 1.269845 | 9.53E-09 | 3.17E-08 |
| AC004943.3    | 0.048414 | 0.14597  | 1.592185 | 4.40E-05 | 8.65E-05 |
| AC020891.2    | 0.005164 | 0.191578 | 5.213379 | 3.93E-10 | 1.57E-09 |
| CTD-2297D10.2 | 0.01485  | 0.074836 | 2.333227 | 3.00E-07 | 8.09E-07 |
| GATA6-AS1     | 1.537469 | 0.494469 | -1.63661 | 6.97E-23 | 1.65E-21 |
| LINC00535     | 0.222913 | 0.098258 | -1.18183 | 2.87E-19 | 4.22E-18 |
| AP000266.1    | 0.038316 | 0.147716 | 1.946827 | 0.031759 | 0.040435 |
| AC015712.6    | 0.040445 | 0.377781 | 3.22352  | 5.02E-12 | 2.66E-11 |
| AC144548.1    | 0.155862 | 0.320425 | 1.039718 | 5.29E-07 | 1.38E-06 |
| AC040160.1    | 0.409031 | 0.841324 | 1.040451 | 5.42E-07 | 1.41E-06 |
| AC211476.2    | 0.094405 | 0.296701 | 1.652074 | 1.31E-05 | 2.78E-05 |
| AC131097.1    | 0.013955 | 0.097258 | 2.80108  | 8.84E-05 | 0.000166 |
| AP000753.2    | 0.055287 | 0.32135  | 2.53914  | 0.024175 | 0.031344 |
| LINC01888     | 0.083524 | 0.030333 | -1.46129 | 2.12E-06 | 5.06E-06 |
| AL358216.1    | 0.015035 | 0.146427 | 3.28374  | 0.037385 | 0.047049 |
| STPG3-AS1     | 0.086994 | 0.401415 | 2.206098 | 1.70E-09 | 6.21E-09 |
| PCAT7         | 0.091977 | 0.547294 | 2.572977 | 3.72E-16 | 3.50E-15 |
| AL390729.1    | 0.041812 | 0.301221 | 2.848818 | 6.00E-06 | 1.34E-05 |
| AL022316.1    | 0.152942 | 0.581739 | 1.927386 | 1.14E-10 | 4.95E-10 |
| LINC00987     | 1.750354 | 0.579073 | -1.59583 | 1.52E-26 | 7.44E-25 |
| SAP30L-AS1    | 0.279939 | 0.657096 | 1.230993 | 0.000593 | 0.000991 |
| AC090796.1    | 0.934712 | 0.154372 | -2.59811 | 1.96E-23 | 5.10E-22 |
| AL606760.3    | 0.00688  | 0.016042 | 1.221354 | 0.000604 | 0.001009 |
| AC245884.8    | 0.346304 | 0.815793 | 1.236165 | 8.75E-08 | 2.56E-07 |
| ASH1L-IT1     | 0.02474  | 0.286289 | 3.532537 | 0.000978 | 0.00158  |
| AC010735.1    | 0.01826  | 0.19667  | 3.429016 | 3.27E-07 | 8.76E-07 |
| C12orf80      | 0.018761 | 0.082784 | 2.141625 | 1.79E-07 | 4.97E-07 |
| AC138207.4    | 0.56142  | 1.244638 | 1.148574 | 6.84E-13 | 4.04E-12 |
| AL121852.1    | 0.038589 | 0.16626  | 2.107185 | 9.42E-12 | 4.81E-11 |
| AL391152.1    | 0.035768 | 0.182725 | 2.352928 | 0.002492 | 0.003776 |
| AC007014.2    | 0.134709 | 0.609729 | 2.178322 | 8.77E-15 | 6.75E-14 |
| AC135895.1    | 0.023505 | 0.006041 | -1.96006 | 6.83E-11 | 3.07E-10 |
| AC020907.4    | 0.791722 | 1.85806  | 1.230731 | 2.68E-07 | 7.27E-07 |
| AL606970.1    | 0.005136 | 0.135755 | 4.724217 | 6.60E-05 | 0.000127 |
| AC144450.1    | 0.04822  | 0.331484 | 2.781247 | 2.25E-09 | 8.02E-09 |
| LINC01785     | 0.38486  | 0.128467 | -1.58294 | 3.17E-34 | 1.64E-31 |
| LINC00958     | 0.174741 | 1.042715 | 2.577053 | 0.025226 | 0.032589 |
| LINC01213     | 0.009575 | 0.266979 | 4.801364 | 1.58E-10 | 6.74E-10 |

|            |          |          |          |          |          |
|------------|----------|----------|----------|----------|----------|
| CYP4F26P   | 0.082266 | 0.264202 | 1.683273 | 0.001544 | 0.002413 |
| AC127496.1 | 0.024215 | 0.056306 | 1.2174   | 0.018833 | 0.024827 |
| AC141930.1 | 0.07875  | 0.569903 | 2.855361 | 7.09E-10 | 2.74E-09 |
| LINC00544  | 0.01271  | 0.030815 | 1.277718 | 0.000163 | 0.000293 |
| AP003392.3 | 0.121687 | 0.256815 | 1.077554 | 1.12E-05 | 2.41E-05 |
| AP000721.2 | 0.006428 | 0.045163 | 2.812784 | 8.24E-08 | 2.42E-07 |
| AC092162.2 | 0.004409 | 0.015495 | 1.813272 | 0.027018 | 0.034754 |
| DDX11-AS1  | 0.059002 | 0.356688 | 2.595822 | 1.83E-30 | 2.64E-28 |
| LINC00659  | 0.017319 | 0.277413 | 4.001626 | 1.59E-06 | 3.87E-06 |
| AC139713.2 | 0.144319 | 0.053642 | -1.42782 | 5.42E-16 | 4.95E-15 |
| AC091114.1 | 0.011577 | 0.038752 | 1.742983 | 0.000116 | 0.000214 |
| AC093484.1 | 0.172188 | 0.084215 | -1.03184 | 5.50E-08 | 1.66E-07 |
| Z82246.1   | 0.630555 | 0.063564 | -3.31035 | 3.13E-29 | 3.09E-27 |
| AC093281.2 | 0.004638 | 0.224106 | 5.594605 | 1.29E-11 | 6.47E-11 |
| AL589765.7 | 0.355901 | 0.162807 | -1.12831 | 2.70E-05 | 5.45E-05 |
| LINC00111  | 0.026875 | 0.06585  | 1.292935 | 9.72E-05 | 0.000182 |
| AL133320.1 | 0.532866 | 0.13702  | -1.95938 | 1.64E-10 | 6.96E-10 |
| SRGAP3-AS2 | 7.202714 | 1.532895 | -2.23228 | 9.90E-13 | 5.74E-12 |
| BBOX1-AS1  | 0.030951 | 1.572359 | 5.666804 | 5.25E-21 | 9.35E-20 |
| LINC00941  | 0.068878 | 0.67699  | 3.297028 | 9.95E-05 | 0.000186 |
| AL354732.1 | 0.07079  | 0.171308 | 1.274976 | 5.85E-10 | 2.29E-09 |
| PACRG-AS1  | 0.068061 | 0.016315 | -2.06059 | 5.01E-17 | 5.41E-16 |
| AC091173.1 | 0.006482 | 0.052979 | 3.030811 | 0.006219 | 0.00885  |
| AC008734.1 | 0.029884 | 0.081494 | 1.447311 | 5.75E-05 | 0.000111 |
| AC108058.1 | 0.062922 | 0.401881 | 2.675141 | 1.23E-12 | 7.07E-12 |
| AL109615.2 | 0.048035 | 0.12802  | 1.414201 | 0.037445 | 0.047106 |
| AL139300.2 | 0.236727 | 0.104904 | -1.17416 | 4.54E-16 | 4.18E-15 |
| LINC00519  | 0.079544 | 0.473332 | 2.573026 | 2.67E-16 | 2.57E-15 |
| AL359538.1 | 0.011784 | 0.031716 | 1.428392 | 0.033961 | 0.043025 |
| AL050320.1 | 0.051917 | 0.141726 | 1.44883  | 0.006441 | 0.009152 |
| AC026904.2 | 0.12094  | 0.040536 | -1.57701 | 3.52E-13 | 2.14E-12 |
| AC131159.1 | 0.133894 | 0.292922 | 1.129428 | 0.001669 | 0.002597 |
| AP003680.1 | 0.008817 | 0.033887 | 1.942437 | 2.30E-15 | 1.95E-14 |
| EXTL3-AS1  | 0.047433 | 0.158683 | 1.742187 | 6.90E-11 | 3.10E-10 |
| NCF4-AS1   | 0.022953 | 0.055705 | 1.279115 | 0.034984 | 0.044188 |
| MIR3945HG  | 5.205868 | 0.497507 | -3.38735 | 6.84E-31 | 1.17E-28 |
| AC092757.2 | 0.171365 | 0.381438 | 1.154373 | 5.91E-05 | 0.000114 |
| MIS18A-AS1 | 0.110601 | 0.326224 | 1.560501 | 9.76E-11 | 4.30E-10 |
| MAFA-AS1   | 0.036297 | 0.876967 | 4.59461  | 3.32E-11 | 1.57E-10 |
| AC083906.3 | 0.03702  | 0.203788 | 2.460688 | 1.51E-07 | 4.25E-07 |
| AC015468.3 | 0.120635 | 0.026234 | -2.20112 | 4.15E-14 | 2.91E-13 |
| LBX2-AS1   | 2.106965 | 4.564234 | 1.115207 | 5.16E-16 | 4.73E-15 |
| LNCOC1     | 0.032042 | 0.121105 | 1.918216 | 6.71E-13 | 3.97E-12 |
| AC011365.2 | 0.1364   | 0.047183 | -1.5315  | 1.68E-16 | 1.67E-15 |

|              |          |          |          |          |          |
|--------------|----------|----------|----------|----------|----------|
| MAGI2-AS3    | 3.156912 | 1.170714 | -1.43113 | 4.30E-26 | 1.95E-24 |
| AC025539.1   | 0.024722 | 0.108537 | 2.134348 | 6.74E-06 | 1.49E-05 |
| CLDN10-AS1   | 0.020316 | 2.072484 | 6.672586 | 3.51E-17 | 3.87E-16 |
| AC006946.3   | 0.02401  | 0.144159 | 2.585952 | 1.49E-07 | 4.21E-07 |
| LINC00891    | 0.261706 | 0.054607 | -2.26078 | 4.02E-28 | 2.84E-26 |
| TTC3-AS1     | 0.035027 | 0.186411 | 2.41196  | 1.69E-11 | 8.38E-11 |
| AC022400.2   | 0.035637 | 0.147043 | 2.044806 | 0.001522 | 0.002382 |
| AC009262.1   | 0.000973 | 0.147116 | 7.240541 | 5.21E-12 | 2.75E-11 |
| AL360093.1   | 0.032551 | 0.126413 | 1.957385 | 0.005114 | 0.007375 |
| AC107959.3   | 0.186751 | 0.975462 | 2.384973 | 1.05E-19 | 1.63E-18 |
| HIF1A-AS2    | 0.310293 | 2.311999 | 2.897439 | 9.60E-07 | 2.41E-06 |
| AC015660.2   | 0.892392 | 0.333662 | -1.41929 | 2.99E-06 | 6.95E-06 |
| LINC01356    | 0.028223 | 0.149925 | 2.409314 | 0.00012  | 0.000221 |
| AC023090.1   | 0.059612 | 0.455548 | 2.933918 | 8.60E-08 | 2.52E-07 |
| AL109741.1   | 2.578332 | 0.487915 | -2.40174 | 2.16E-29 | 2.17E-27 |
| C8orf31      | 0.321629 | 1.013762 | 1.65625  | 1.83E-09 | 6.65E-09 |
| AL353801.1   | 0.056002 | 0.232432 | 2.053266 | 0.002182 | 0.003333 |
| AL031728.1   | 0.111378 | 0.277403 | 1.31652  | 3.63E-09 | 1.26E-08 |
| AL589765.1   | 0.050977 | 0.23457  | 2.202092 | 0.000135 | 0.000246 |
| ATP6V1B1-AS1 | 0.015579 | 0.059671 | 1.937442 | 0.000462 | 0.000782 |
| AC007249.2   | 0.365679 | 0.813433 | 1.153448 | 1.19E-09 | 4.44E-09 |
| AL109811.1   | 0.054154 | 0.119092 | 1.136947 | 2.74E-08 | 8.60E-08 |
| AL365356.4   | 0.032419 | 0.817453 | 4.65621  | 9.82E-23 | 2.27E-21 |
| RMST         | 0.259215 | 0.084776 | -1.61242 | 7.67E-20 | 1.21E-18 |
| CRTC3-AS1    | 0.12594  | 0.297621 | 1.240743 | 2.35E-10 | 9.72E-10 |
| AC011503.1   | 0.078095 | 0.235885 | 1.59479  | 0.000319 | 0.000551 |
| C20orf197    | 0.114964 | 1.052337 | 3.194347 | 6.54E-11 | 2.95E-10 |
| AL354707.2   | 0.023127 | 0.088621 | 1.938086 | 1.28E-06 | 3.15E-06 |
| AC106037.1   | 0.156609 | 0.394935 | 1.334447 | 1.04E-08 | 3.45E-08 |
| AC005387.2   | 0.182619 | 0.423712 | 1.214245 | 7.90E-10 | 3.04E-09 |
| CACNA1G-AS1  | 0.027642 | 0.074252 | 1.425547 | 8.05E-05 | 0.000152 |
| AC109454.3   | 0.01443  | 0.264956 | 4.198569 | 1.50E-06 | 3.64E-06 |
| AC022784.6   | 0.035556 | 0.2482   | 2.803336 | 2.65E-11 | 1.28E-10 |
| AC022148.2   | 0.017184 | 0.064302 | 1.903842 | 3.20E-06 | 7.40E-06 |
| AC009120.5   | 0.026611 | 0.084001 | 1.658403 | 6.10E-06 | 1.36E-05 |
| AC005757.1   | 0.026246 | 0.122881 | 2.22708  | 0.006806 | 0.009615 |
| TBX5-AS1     | 4.262145 | 1.31053  | -1.70143 | 4.87E-26 | 2.13E-24 |
| MYCNOS       | 0.00514  | 0.087932 | 4.096656 | 1.04E-07 | 2.99E-07 |
| AL583810.2   | 0.032206 | 0.083515 | 1.374705 | 0.000496 | 0.000837 |
| AL021392.1   | 0.376418 | 0.820921 | 1.124908 | 1.85E-09 | 6.71E-09 |
| AC073283.2   | 0.05115  | 0.163269 | 1.674443 | 0.000152 | 0.000275 |
| AC005899.1   | 0.077571 | 0.189538 | 1.288906 | 0.00043  | 0.000731 |
| AP000350.7   | 0.013229 | 0.040136 | 1.601187 | 5.88E-10 | 2.30E-09 |
| AC012213.2   | 0.01104  | 0.029359 | 1.411126 | 8.47E-05 | 0.00016  |

|            |          |          |          |          |          |
|------------|----------|----------|----------|----------|----------|
| AC245100.1 | 0.022246 | 0.055434 | 1.317199 | 2.10E-06 | 5.01E-06 |
| AL354793.1 | 0.030451 | 0.097151 | 1.673752 | 0.0037   | 0.005456 |
| AC097717.1 | 0.004794 | 0.016832 | 1.81192  | 1.12E-06 | 2.78E-06 |
| AC105053.1 | 0.301857 | 0.13575  | -1.15291 | 3.88E-16 | 3.64E-15 |
| LINC01918  | 0.019575 | 0.040997 | 1.066541 | 0.021355 | 0.027937 |
| AC092171.3 | 0.45323  | 0.993852 | 1.132789 | 9.12E-05 | 0.000171 |
| RDH10-AS1  | 0.116955 | 0.535073 | 2.193789 | 1.22E-05 | 2.61E-05 |
| AC016044.1 | 0.001954 | 0.483099 | 7.95     | 4.69E-11 | 2.17E-10 |
| PIK3CD-AS2 | 1.020531 | 3.614771 | 1.824585 | 7.88E-14 | 5.25E-13 |
| AC245060.6 | 0.081994 | 0.240759 | 1.554004 | 6.87E-13 | 4.05E-12 |
| STEAP3-AS1 | 0.058435 | 0.162265 | 1.47344  | 2.02E-07 | 5.59E-07 |
| AL138902.1 | 0.017603 | 0.13241  | 2.911116 | 2.19E-14 | 1.60E-13 |
| AC091153.2 | 0.024091 | 0.098643 | 2.033744 | 4.62E-05 | 9.05E-05 |
| AL353768.1 | 0.035367 | 0.120751 | 1.771558 | 0.000903 | 0.001465 |
| LINC01913  | 0.021854 | 0.188731 | 3.110338 | 0.000112 | 0.000208 |
| AL139383.1 | 0.220521 | 0.100945 | -1.12734 | 9.26E-17 | 9.58E-16 |
| FALEC      | 0.096391 | 0.284975 | 1.563867 | 1.34E-11 | 6.68E-11 |
| APCDD1L-DT | 0.016105 | 0.147934 | 3.199377 | 7.92E-08 | 2.34E-07 |
| LINC02345  | 2.015321 | 0.847536 | -1.24966 | 4.84E-14 | 3.35E-13 |
| AL445423.1 | 0.967875 | 0.191592 | -2.33678 | 4.88E-25 | 1.73E-23 |
| AL133255.1 | 0.035474 | 0.121419 | 1.775143 | 0.000117 | 0.000215 |
| TCEAL3-AS1 | 0.033436 | 0.26666  | 2.995539 | 0.000511 | 0.00086  |
| AC008758.2 | 0.02741  | 0.079383 | 1.534126 | 0.007636 | 0.010714 |
| AC097532.2 | 0.013309 | 0.039482 | 1.568826 | 4.89E-06 | 1.10E-05 |
| AC010319.4 | 0.193624 | 0.435983 | 1.171017 | 1.25E-11 | 6.30E-11 |
| AC027338.1 | 0.052077 | 0.126815 | 1.284019 | 0.007348 | 0.010342 |
| AC010735.2 | 0.230428 | 1.06765  | 2.212048 | 3.82E-05 | 7.56E-05 |
| AL391095.3 | 0.067131 | 0.134392 | 1.001386 | 0.030766 | 0.039243 |
| LINC02473  | 0.002724 | 0.073185 | 4.747843 | 4.10E-18 | 5.18E-17 |
| HCFC1-AS1  | 0.07648  | 0.211418 | 1.46694  | 6.76E-05 | 0.000129 |
| AC027031.2 | 0.44227  | 1.411978 | 1.674718 | 3.14E-09 | 1.10E-08 |
| DCST1-AS1  | 0.544073 | 1.952514 | 1.843461 | 6.99E-24 | 1.94E-22 |
| AC011405.1 | 0.045462 | 0.19148  | 2.074466 | 0.008804 | 0.01222  |
| AP002336.2 | 0.208605 | 0.592934 | 1.507095 | 3.20E-10 | 1.29E-09 |
| AC079340.2 | 0.015395 | 0.045811 | 1.573263 | 0.000104 | 0.000194 |
| AL049874.3 | 0.008923 | 0.113284 | 3.666236 | 9.33E-10 | 3.54E-09 |
| AC068580.1 | 0.768331 | 1.821999 | 1.245722 | 1.06E-09 | 4.00E-09 |
| SENCR      | 1.289903 | 0.537514 | -1.26289 | 4.41E-23 | 1.08E-21 |
| AC121757.1 | 0.589505 | 1.517978 | 1.364575 | 4.72E-06 | 1.07E-05 |
| AC025580.1 | 0.301615 | 5.817253 | 4.269556 | 6.03E-24 | 1.73E-22 |
| AC226118.1 | 0.154525 | 0.424486 | 1.457876 | 0.009664 | 0.013336 |
| AC244453.1 | 0.025827 | 0.065797 | 1.349147 | 0.000752 | 0.001234 |
| AC007938.2 | 0.024644 | 0.08683  | 1.816953 | 5.56E-09 | 1.90E-08 |
| AP003419.3 | 0.310423 | 0.648966 | 1.063908 | 5.87E-07 | 1.51E-06 |

|             |          |          |          |          |          |
|-------------|----------|----------|----------|----------|----------|
| AP000253.1  | 0.015508 | 0.054233 | 1.806145 | 4.05E-11 | 1.89E-10 |
| AC008121.2  | 0.09998  | 0.208563 | 1.060766 | 0.033447 | 0.042428 |
| HCG15       | 0.198102 | 0.590676 | 1.57612  | 6.50E-14 | 4.40E-13 |
| MIR4435-2HG | 1.218079 | 2.759324 | 1.179707 | 1.48E-19 | 2.23E-18 |
| AL121652.1  | 0.039676 | 0.315469 | 2.991164 | 3.08E-05 | 6.16E-05 |
| LINC00319   | 0.002002 | 0.016445 | 3.037849 | 1.79E-06 | 4.34E-06 |
| LINC02381   | 1.962675 | 4.538867 | 1.209511 | 0.03151  | 0.040135 |
| AC026401.3  | 2.833622 | 7.864198 | 1.472652 | 1.47E-25 | 6.10E-24 |
| AC025271.4  | 0.55039  | 0.137881 | -1.99703 | 2.29E-24 | 7.18E-23 |
| AP001528.2  | 1.05182  | 0.473836 | -1.15043 | 5.99E-20 | 9.57E-19 |
| AC005996.1  | 0.017595 | 0.224834 | 3.675638 | 1.09E-07 | 3.15E-07 |
| AP003352.1  | 1.089431 | 2.294235 | 1.074439 | 2.50E-12 | 1.37E-11 |
| DEPDC1-AS1  | 0.00706  | 0.040208 | 2.509751 | 2.03E-09 | 7.32E-09 |
| AC073957.1  | 0.018328 | 0.137197 | 2.904135 | 6.85E-06 | 1.51E-05 |
| AC109361.2  | 0.666814 | 0.314256 | -1.08534 | 1.34E-14 | 1.01E-13 |
| LINC02104   | 0.614965 | 0.148526 | -2.04979 | 1.76E-28 | 1.44E-26 |
| AL109917.1  | 0.192233 | 0.388199 | 1.013942 | 1.27E-05 | 2.71E-05 |
| AC035139.1  | 0.14387  | 0.395078 | 1.457371 | 0.029233 | 0.037449 |
| AC133961.1  | 0.058228 | 0.129284 | 1.150748 | 0.000388 | 0.000663 |
| LINC01594   | 0.043053 | 0.205201 | 2.252836 | 0.00097  | 0.001568 |
| AC005537.1  | 0.010712 | 0.151585 | 3.822834 | 6.03E-07 | 1.55E-06 |
| AC008635.1  | 0.055105 | 0.121926 | 1.145736 | 0.002692 | 0.004059 |
| AL031600.2  | 0.031035 | 0.143846 | 2.21256  | 0.00109  | 0.001749 |
| LINC01234   | 0.006271 | 0.310649 | 5.630537 | 4.99E-10 | 1.97E-09 |
| AC016597.1  | 0.016274 | 0.060993 | 1.906084 | 0.001428 | 0.002247 |
| AC116552.1  | 0.111633 | 0.310506 | 1.475862 | 0.000111 | 0.000207 |
| AC018809.1  | 0.183947 | 0.508495 | 1.466939 | 4.07E-09 | 1.41E-08 |
| C8orf34-AS1 | 8.883668 | 3.697244 | -1.26471 | 1.86E-18 | 2.46E-17 |
| AP001469.3  | 0.340622 | 0.955346 | 1.487853 | 8.77E-16 | 7.81E-15 |
| U47924.1    | 0.049474 | 0.266401 | 2.428849 | 8.52E-14 | 5.65E-13 |
| AC109809.1  | 0.06931  | 0.142926 | 1.044127 | 0.027463 | 0.035298 |
| AL356270.1  | 0.023172 | 0.086245 | 1.896036 | 0.00042  | 0.000716 |
| AC007494.2  | 0.023083 | 0.301066 | 3.705162 | 0.026304 | 0.033893 |
| AC147651.1  | 0.024175 | 0.07707  | 1.672661 | 0.029485 | 0.03771  |
| FOX CUT     | 0.051844 | 0.299207 | 2.528907 | 7.85E-06 | 1.72E-05 |
| AL121895.1  | 0.039985 | 0.145256 | 1.861065 | 0.039702 | 0.049724 |
| AC090515.5  | 0.033831 | 0.131679 | 1.960621 | 0.00946  | 0.013075 |
| SBF2-AS1    | 0.526166 | 1.457126 | 1.469535 | 1.92E-27 | 1.13E-25 |
| AC104836.1  | 0.313156 | 0.135937 | -1.20394 | 3.87E-15 | 3.16E-14 |
| LINC02454   | 0.028252 | 0.240625 | 3.090368 | 0.000632 | 0.001049 |
| AP002360.3  | 0.343895 | 0.982038 | 1.513811 | 2.97E-10 | 1.21E-09 |
| LINC00342   | 2.179967 | 9.596258 | 2.138165 | 2.24E-05 | 4.59E-05 |
| AC068025.1  | 0.04588  | 0.224484 | 2.290672 | 2.80E-15 | 2.35E-14 |
| AC004585.1  | 0.452926 | 1.183981 | 1.386297 | 3.02E-11 | 1.44E-10 |

|            |          |          |          |          |          |
|------------|----------|----------|----------|----------|----------|
| AC099518.1 | 0.140794 | 0.719221 | 2.352851 | 2.87E-13 | 1.77E-12 |
| LINC01055  | 0.059195 | 0.143764 | 1.280163 | 0.000503 | 0.000849 |
| AC008937.2 | 0.028466 | 0.317776 | 3.480714 | 0.036297 | 0.045763 |
| ERVE-1     | 0.951512 | 0.447106 | -1.08961 | 8.92E-17 | 9.24E-16 |
| AL138921.1 | 0.128788 | 0.264179 | 1.036521 | 2.71E-08 | 8.52E-08 |
| AC068473.3 | 0.037784 | 0.086202 | 1.189932 | 0.012396 | 0.016797 |
| C6orf99    | 0.487139 | 1.148374 | 1.237186 | 1.65E-10 | 7.00E-10 |
| AC114956.2 | 0.115059 | 0.250507 | 1.122477 | 6.71E-05 | 0.000128 |
| RHPN1-AS1  | 0.431064 | 1.409891 | 1.709609 | 1.64E-19 | 2.47E-18 |
| AL022724.1 | 0.100961 | 0.290781 | 1.52614  | 0.014536 | 0.019477 |
| LINC00114  | 0.025915 | 0.011605 | -1.15903 | 3.81E-10 | 1.53E-09 |
| AC026992.1 | 0.663062 | 0.143491 | -2.20818 | 4.62E-24 | 1.37E-22 |
| AC011815.2 | 0.062735 | 0.170875 | 1.445591 | 1.34E-05 | 2.85E-05 |
| AP000446.1 | 0.013721 | 0.033052 | 1.268375 | 0.000539 | 0.000906 |
| AFAP1-AS1  | 0.135049 | 11.84695 | 6.454888 | 5.64E-22 | 1.13E-20 |
| LINC02081  | 0.135611 | 1.122754 | 3.0495   | 3.04E-16 | 2.90E-15 |
| AC022148.1 | 0.015147 | 0.182637 | 3.59192  | 1.38E-05 | 2.91E-05 |
| CARS-AS1   | 0.013226 | 0.054936 | 2.054353 | 0.002286 | 0.003482 |
| AL079303.1 | 0.05043  | 0.561805 | 3.477707 | 1.12E-19 | 1.72E-18 |
| XXYLT1-AS1 | 0.030739 | 0.138592 | 2.172709 | 7.14E-05 | 0.000136 |
| LINC00165  | 0.522192 | 0.096396 | -2.43754 | 5.56E-25 | 1.95E-23 |
| LHFPL3-AS1 | 0.148253 | 0.053485 | -1.47085 | 6.82E-19 | 9.60E-18 |
| AC122710.3 | 0.024014 | 0.213388 | 3.151557 | 7.64E-14 | 5.12E-13 |
| AL357079.1 | 0.340246 | 0.736201 | 1.113524 | 1.70E-11 | 8.40E-11 |
| FO680682.1 | 0.033096 | 0.246885 | 2.899104 | 2.33E-08 | 7.40E-08 |
| AC021491.2 | 0.028387 | 0.110542 | 1.961281 | 1.00E-08 | 3.33E-08 |
| AC004543.1 | 0.037727 | 0.114686 | 1.604031 | 1.50E-05 | 3.15E-05 |
| AC010834.3 | 0.702125 | 1.573474 | 1.164153 | 3.09E-07 | 8.30E-07 |
| LINC00305  | 0.026853 | 0.0126   | -1.09162 | 0.000366 | 0.000628 |
| AC025174.1 | 0.19418  | 0.068417 | -1.50496 | 1.10E-07 | 3.17E-07 |
| AC074135.1 | 0.185488 | 0.871196 | 2.231674 | 0.003811 | 0.005606 |
| AC023301.1 | 0.011861 | 0.272213 | 4.520382 | 1.27E-17 | 1.50E-16 |
| C1orf220   | 0.056868 | 0.306967 | 2.432398 | 1.09E-22 | 2.49E-21 |
| IRAIN      | 0.098615 | 0.282146 | 1.516558 | 1.15E-06 | 2.84E-06 |
| AC239809.3 | 0.018813 | 0.044237 | 1.233535 | 0.002754 | 0.004144 |
| AC023825.2 | 0.074359 | 0.247466 | 1.734659 | 2.29E-05 | 4.68E-05 |
| TNKS2-AS1  | 0.262022 | 0.541072 | 1.046134 | 4.82E-06 | 1.09E-05 |
| AL161729.4 | 0.126757 | 0.254606 | 1.006196 | 0.00024  | 0.000423 |
| AC100791.3 | 0.035182 | 0.100691 | 1.517016 | 0.015275 | 0.020387 |
| AC011899.3 | 1.317664 | 0.325141 | -2.01885 | 3.99E-25 | 1.45E-23 |
| AC243965.2 | 0.032359 | 0.076822 | 1.247339 | 2.17E-05 | 4.45E-05 |
| AC093520.1 | 0.015128 | 0.072682 | 2.264422 | 9.60E-08 | 2.79E-07 |
| AC106795.3 | 0.091032 | 0.034965 | -1.38045 | 7.65E-09 | 2.58E-08 |
| AC100827.4 | 0.016386 | 0.039553 | 1.271294 | 0.039013 | 0.048939 |

|            |          |          |          |          |          |
|------------|----------|----------|----------|----------|----------|
| AC003985.2 | 0.208031 | 0.066309 | -1.64953 | 1.13E-11 | 5.71E-11 |
| AC020659.1 | 0.086349 | 0.279474 | 1.694462 | 1.88E-05 | 3.90E-05 |
| OR7E11P    | 0.162008 | 0.04098  | -1.98307 | 5.96E-20 | 9.56E-19 |
| LINC01537  | 0.279291 | 0.1039   | -1.42658 | 4.69E-23 | 1.13E-21 |
| AC069360.1 | 0.744177 | 0.191183 | -1.96069 | 6.34E-25 | 2.20E-23 |
| LINC00649  | 0.329694 | 0.758045 | 1.201157 | 6.53E-07 | 1.67E-06 |
| LINC01588  | 0.126707 | 0.327279 | 1.36902  | 7.31E-20 | 1.16E-18 |
| SPATA3-AS1 | 0.004623 | 0.029342 | 2.665995 | 1.14E-09 | 4.26E-09 |
| AC122134.1 | 0.001351 | 0.123641 | 6.515594 | 1.62E-10 | 6.87E-10 |
| AC074366.1 | 0.010355 | 0.075147 | 2.859336 | 0.003053 | 0.004562 |
| AP006284.1 | 1.333177 | 2.712039 | 1.02451  | 0.012396 | 0.016797 |
| AL031985.3 | 0.367852 | 1.467183 | 1.995853 | 5.59E-30 | 6.32E-28 |
| AL022323.3 | 0.003426 | 0.021572 | 2.65454  | 0.001433 | 0.002254 |
| AL353747.3 | 0.540484 | 0.223342 | -1.275   | 2.42E-08 | 7.66E-08 |
| AC008011.2 | 0.178509 | 0.058114 | -1.61905 | 1.32E-18 | 1.77E-17 |
| AC110285.1 | 0.100901 | 0.258817 | 1.358989 | 6.52E-09 | 2.22E-08 |
| AL390198.1 | 0.709543 | 2.111819 | 1.573524 | 4.51E-06 | 1.02E-05 |
| AL132800.1 | 0.23767  | 0.556351 | 1.227038 | 2.40E-09 | 8.54E-09 |
| AC092338.1 | 0.154784 | 0.51649  | 1.738481 | 0.016519 | 0.021944 |
| AZIN1-AS1  | 0.542226 | 1.111675 | 1.035769 | 1.84E-10 | 7.72E-10 |
| LINC01659  | 0.093237 | 0.44129  | 2.242746 | 0.000469 | 0.000794 |
| AC004584.1 | 0.052569 | 0.204417 | 1.95922  | 4.97E-13 | 2.98E-12 |
| AC080023.1 | 0.056476 | 0.14283  | 1.338589 | 8.97E-05 | 0.000169 |
| AC004584.3 | 0.041424 | 0.08291  | 1.001074 | 0.010004 | 0.013757 |
| AC096637.2 | 0.58138  | 0.179244 | -1.69756 | 3.05E-05 | 6.10E-05 |
| AC007743.1 | 1.319561 | 0.415754 | -1.66626 | 2.30E-23 | 5.87E-22 |
| DANT2      | 0.052369 | 0.40402  | 2.947654 | 0.033966 | 0.043025 |
| AGBL1-AS1  | 0.03891  | 0.015495 | -1.32834 | 4.72E-26 | 2.08E-24 |
| AC092078.1 | 0.106538 | 0.011427 | -3.22083 | 6.73E-38 | 8.36E-35 |
| FNDC1-IT1  | 0.008378 | 0.112418 | 3.746107 | 2.48E-11 | 1.20E-10 |
| LINC01185  | 0.01659  | 0.058382 | 1.815243 | 8.70E-07 | 2.20E-06 |
| AC010978.1 | 0.018848 | 0.133837 | 2.827976 | 0.008015 | 0.011211 |
| AL353693.1 | 0.009359 | 0.65578  | 6.13068  | 4.44E-17 | 4.82E-16 |
| AC087741.1 | 0.471056 | 1.560282 | 1.727837 | 1.29E-14 | 9.67E-14 |
| LINC02159  | 0.04575  | 0.876506 | 4.259929 | 2.18E-18 | 2.85E-17 |
| AC036214.1 | 0.02363  | 0.084708 | 1.841858 | 0.003307 | 0.004915 |
| AP003469.2 | 0.129854 | 1.007983 | 2.956513 | 1.08E-21 | 2.12E-20 |
| AC026469.1 | 0.069791 | 0.031018 | -1.16993 | 9.35E-17 | 9.65E-16 |
| AC069209.1 | 0.544024 | 0.212912 | -1.35341 | 1.07E-18 | 1.47E-17 |
| AC008991.1 | 0.052772 | 0.017586 | -1.58534 | 6.90E-07 | 1.76E-06 |
| TM4SF1-AS1 | 0.210941 | 0.775048 | 1.877447 | 5.09E-09 | 1.75E-08 |
| AL357146.1 | 0.100887 | 0.015675 | -2.68616 | 2.72E-27 | 1.56E-25 |
| AL161804.1 | 0.022537 | 0.069084 | 1.616081 | 3.49E-05 | 6.92E-05 |
| AC007249.1 | 0.165146 | 0.603961 | 1.870716 | 1.41E-08 | 4.58E-08 |

|               |          |          |          |          |          |
|---------------|----------|----------|----------|----------|----------|
| KCNQ1DN       | 0.025895 | 0.011012 | -1.23352 | 4.92E-05 | 9.60E-05 |
| LINC01973     | 0.004061 | 0.008184 | 1.011015 | 0.010381 | 0.014238 |
| AL445685.1    | 0.023095 | 0.08746  | 1.921012 | 0.029267 | 0.037486 |
| AC234778.2    | 0.037783 | 0.143674 | 1.926988 | 0.01478  | 0.019785 |
| AL583722.1    | 0.048926 | 0.166268 | 1.764846 | 1.19E-07 | 3.40E-07 |
| CASC19        | 0.023735 | 0.627508 | 4.72456  | 0.000164 | 0.000296 |
| AP000845.1    | 0.048617 | 0.10849  | 1.158026 | 1.32E-07 | 3.74E-07 |
| AC097537.1    | 0.096099 | 0.022304 | -2.10721 | 4.03E-39 | 8.36E-36 |
| LMO7DN-IT1    | 0.679636 | 0.30432  | -1.15918 | 4.64E-10 | 1.83E-09 |
| SLX1A-SULT1A3 | 0.010326 | 0.030099 | 1.543449 | 2.64E-09 | 9.39E-09 |
| AL109914.1    | 0.105219 | 0.65514  | 2.638413 | 3.62E-09 | 1.26E-08 |
| AC010864.1    | 0.140927 | 0.336407 | 1.255255 | 8.06E-15 | 6.24E-14 |
| LINC01524     | 0.001234 | 0.018745 | 3.925334 | 2.04E-06 | 4.88E-06 |
| LINC00461     | 0.001639 | 0.042263 | 4.68874  | 2.91E-17 | 3.24E-16 |
| LINC01510     | 0.008829 | 0.151829 | 4.104045 | 7.10E-06 | 1.57E-05 |
| AC022445.1    | 0.0346   | 0.163731 | 2.242501 | 2.04E-06 | 4.88E-06 |
| AC103736.1    | 0.244192 | 0.12104  | -1.01254 | 5.10E-11 | 2.35E-10 |
| AC008735.2    | 1.33641  | 2.753931 | 1.04313  | 1.97E-07 | 5.43E-07 |
| LINC02041     | 0.941167 | 3.591536 | 1.932079 | 9.46E-05 | 0.000177 |
| AC007365.1    | 0.134853 | 0.335613 | 1.31541  | 0.001253 | 0.001993 |
| AL391832.2    | 0.233399 | 0.503323 | 1.108683 | 1.94E-09 | 7.03E-09 |
| AC137894.1    | 0.174337 | 0.56711  | 1.701747 | 2.10E-05 | 4.32E-05 |
| AL031717.1    | 0.218435 | 0.699589 | 1.679303 | 2.49E-10 | 1.03E-09 |
| AC008063.2    | 0.014329 | 0.089387 | 2.641151 | 6.53E-09 | 2.22E-08 |
| AC003681.1    | 0.082713 | 0.20346  | 1.298552 | 0.000206 | 0.000367 |
| AC104695.3    | 0.657728 | 2.503512 | 1.92839  | 0.004873 | 0.007043 |
| LINC02231     | 0.16433  | 0.046564 | -1.81931 | 1.13E-13 | 7.35E-13 |
| AL139035.1    | 0.074277 | 0.218919 | 1.559409 | 4.73E-12 | 2.52E-11 |
| AL049646.1    | 0.006579 | 0.026521 | 2.01125  | 0.015519 | 0.020673 |
| AC010997.4    | 0.073846 | 0.175557 | 1.249347 | 0.00101  | 0.001629 |
| GS1-594A7.3   | 0.03352  | 0.297892 | 3.151696 | 2.89E-09 | 1.02E-08 |
| AC091946.2    | 0.047799 | 0.199653 | 2.062433 | 0.001517 | 0.002375 |
| AC016590.1    | 0.035774 | 0.125804 | 1.814211 | 0.00015  | 0.000272 |
| AC125611.4    | 0.257054 | 0.0836   | -1.6205  | 4.84E-09 | 1.67E-08 |
| AL589743.4    | 0.012457 | 0.127976 | 3.360811 | 3.79E-06 | 8.67E-06 |
| LINC01337     | 0.032812 | 0.089265 | 1.443893 | 2.73E-05 | 5.51E-05 |
| AC083949.1    | 1.00169  | 0.446856 | -1.16455 | 1.32E-16 | 1.33E-15 |
| SMILR         | 0.024689 | 0.17127  | 2.794341 | 0.002174 | 0.003323 |
| AC015689.1    | 0.106515 | 0.314132 | 1.56031  | 2.78E-05 | 5.60E-05 |
| AC106795.2    | 0.156917 | 0.343759 | 1.131395 | 0.003208 | 0.004777 |
| AL513327.2    | 0.038764 | 0.276597 | 2.834995 | 2.36E-13 | 1.48E-12 |
| AL365194.1    | 0.064443 | 0.029515 | -1.12655 | 0.000146 | 0.000265 |
| AL162411.1    | 0.080547 | 0.495022 | 2.619583 | 4.55E-06 | 1.03E-05 |
| AC239803.3    | 0.04103  | 0.269448 | 2.715268 | 9.31E-16 | 8.22E-15 |



|                 |          |          |          |          |          |
|-----------------|----------|----------|----------|----------|----------|
| LINC02068       | 0.021598 | 0.074841 | 1.792916 | 3.91E-05 | 7.72E-05 |
| AL137786.1      | 0.096815 | 0.037756 | -1.3585  | 9.67E-07 | 2.43E-06 |
| AP001021.2      | 0.122898 | 0.315791 | 1.361509 | 0.000788 | 0.001289 |
| AC099066.2      | 0.030708 | 0.280565 | 3.19165  | 8.30E-21 | 1.44E-19 |
| AC069120.1      | 0.02259  | 0.458757 | 4.344006 | 3.14E-05 | 6.26E-05 |
| AC004707.1      | 0.080106 | 0.228195 | 1.510289 | 4.38E-08 | 1.34E-07 |
| AL358072.1      | 0.155187 | 0.317147 | 1.031143 | 0.000117 | 0.000215 |
| AC108134.2      | 0.445089 | 0.984219 | 1.144887 | 1.91E-12 | 1.07E-11 |
| PCAT6           | 0.776601 | 5.629806 | 2.857839 | 3.38E-28 | 2.47E-26 |
| Z82243.1        | 0.267302 | 0.767361 | 1.521434 | 2.15E-07 | 5.92E-07 |
| AL161668.3      | 0.063576 | 0.167534 | 1.397898 | 2.72E-10 | 1.12E-09 |
| LINC00844       | 0.422556 | 0.058155 | -2.86116 | 2.85E-28 | 2.16E-26 |
| PDXDC2P-NPIP14P | 0.61691  | 1.420761 | 1.203532 | 6.31E-09 | 2.15E-08 |
| AC093535.1      | 0.185304 | 0.495971 | 1.420364 | 2.26E-05 | 4.63E-05 |
| AL355488.1      | 0.679824 | 1.735782 | 1.352353 | 1.17E-09 | 4.37E-09 |
| AL512656.1      | 0.133219 | 0.334195 | 1.326889 | 1.53E-05 | 3.20E-05 |
| AC010998.3      | 1.426173 | 0.474297 | -1.58829 | 3.54E-22 | 7.44E-21 |
| AC024592.2      | 0.058303 | 0.338294 | 2.536629 | 7.69E-14 | 5.14E-13 |
| AC011773.3      | 0.051638 | 0.116858 | 1.178245 | 7.30E-06 | 1.61E-05 |
| RHOXF1-AS1      | 3.731158 | 1.282982 | -1.54012 | 4.15E-19 | 6.02E-18 |
| AC131097.3      | 0.055854 | 0.268683 | 2.266171 | 1.68E-07 | 4.69E-07 |
| AC009686.2      | 0.326397 | 0.893859 | 1.45342  | 1.22E-11 | 6.13E-11 |
| DPH6-DT         | 0.225535 | 0.112666 | -1.0013  | 9.16E-15 | 7.03E-14 |
| LINC00880       | 0.027618 | 0.331789 | 3.586595 | 6.12E-21 | 1.08E-19 |
| LINC01572       | 0.019983 | 0.190689 | 3.254346 | 4.58E-29 | 4.44E-27 |
| AC104561.3      | 0.049589 | 0.131071 | 1.402255 | 1.15E-07 | 3.31E-07 |
| AC100826.1      | 0.019226 | 0.950254 | 5.627146 | 1.60E-05 | 3.35E-05 |
| GRM5-AS1        | 0.002721 | 0.01694  | 2.638402 | 2.48E-07 | 6.76E-07 |
| AL662844.3      | 0.292944 | 0.600873 | 1.036436 | 0.000137 | 0.000251 |
| AL513218.1      | 0.304506 | 0.811288 | 1.413743 | 7.84E-09 | 2.63E-08 |
| AC099811.1      | 0.027122 | 0.238656 | 3.137421 | 0.005459 | 0.007837 |
| ZNF793-AS1      | 0.418559 | 1.213027 | 1.535108 | 1.59E-09 | 5.83E-09 |
| LINC01224       | 0.089989 | 0.611429 | 2.764366 | 0.00128  | 0.002032 |
| LINC02122       | 0.016825 | 0.572418 | 5.088429 | 1.31E-10 | 5.66E-10 |
| AL049539.1      | 0.028682 | 0.445059 | 3.955757 | 5.17E-16 | 4.74E-15 |
| AC022182.1      | 0.043408 | 0.212962 | 2.294556 | 3.40E-11 | 1.60E-10 |
| AC007991.3      | 0.029388 | 0.120455 | 2.035184 | 0.001318 | 0.002086 |
| AC009065.5      | 0.223218 | 3.250209 | 3.864007 | 9.28E-22 | 1.82E-20 |
| MIR3142HG       | 0.327094 | 0.920323 | 1.492433 | 1.53E-05 | 3.20E-05 |
| LINC02182       | 0.010848 | 0.060248 | 2.473462 | 6.39E-06 | 1.42E-05 |
| BARX1-DT        | 0.001619 | 0.393406 | 7.924721 | 1.23E-12 | 7.04E-12 |
| AC017002.1      | 0.042611 | 0.228478 | 2.422746 | 0.000436 | 0.000741 |
| AC103681.2      | 0.128195 | 0.063378 | -1.0163  | 2.84E-09 | 1.00E-08 |
| LINC01165       | 0.137265 | 0.028441 | -2.27092 | 8.12E-23 | 1.91E-21 |

|             |          |          |          |          |          |
|-------------|----------|----------|----------|----------|----------|
| LINC00514   | 0.063294 | 0.143056 | 1.176437 | 0.014453 | 0.019378 |
| FRGCA       | 0.047062 | 0.855032 | 4.183342 | 9.35E-18 | 1.13E-16 |
| AC017033.1  | 0.082085 | 0.231335 | 1.494794 | 0.034291 | 0.043375 |
| AP000553.2  | 0.095041 | 0.867322 | 3.189947 | 6.38E-19 | 9.03E-18 |
| AL161757.2  | 0.044686 | 0.156888 | 1.811826 | 0.007517 | 0.010562 |
| FOXD3-AS1   | 0.005244 | 1.111198 | 7.727223 | 1.78E-26 | 8.45E-25 |
| TFAP2A-AS1  | 0.049028 | 0.456439 | 3.218735 | 3.24E-25 | 1.21E-23 |
| AC112721.2  | 0.031859 | 0.409362 | 3.68361  | 7.24E-17 | 7.64E-16 |
| LINC02048   | 0.0028   | 0.064484 | 4.525455 | 1.07E-06 | 2.67E-06 |
| AC005699.1  | 0.024401 | 0.097717 | 2.001664 | 3.71E-05 | 7.35E-05 |
| AC093690.1  | 0.085939 | 0.235652 | 1.455265 | 0.030909 | 0.039418 |
| LEF1-AS1    | 0.025301 | 0.067091 | 1.40695  | 7.00E-12 | 3.64E-11 |
| ITGA6-AS1   | 0.153788 | 0.407101 | 1.404441 | 1.92E-12 | 1.07E-11 |
| AC103858.2  | 0.031274 | 0.093422 | 1.578812 | 5.03E-05 | 9.80E-05 |
| FOXP4-AS1   | 0.346392 | 0.801895 | 1.211008 | 2.77E-05 | 5.57E-05 |
| LINC01271   | 0.04758  | 0.307436 | 2.691867 | 3.65E-25 | 1.34E-23 |
| AL157895.1  | 0.724855 | 0.292202 | -1.31073 | 2.83E-18 | 3.65E-17 |
| AL451074.2  | 0.076816 | 0.199231 | 1.37496  | 5.50E-10 | 2.16E-09 |
| AC104316.2  | 0.022386 | 0.090748 | 2.019246 | 0.000313 | 0.000541 |
| CERS6-AS1   | 0.00512  | 0.014088 | 1.460353 | 1.55E-06 | 3.77E-06 |
| AL355303.1  | 0.021261 | 0.092596 | 2.122728 | 0.000916 | 0.001485 |
| AC110619.1  | 0.131981 | 0.616542 | 2.223865 | 1.46E-06 | 3.57E-06 |
| AC139887.2  | 0.560432 | 1.456404 | 1.377798 | 1.75E-16 | 1.73E-15 |
| AC012456.2  | 0.021467 | 0.10385  | 2.274316 | 4.21E-06 | 9.60E-06 |
| NKX2-1-AS1  | 2.715102 | 5.634702 | 1.053333 | 1.13E-06 | 2.81E-06 |
| EPB41L4A-DT | 1.245451 | 0.589581 | -1.07891 | 2.18E-18 | 2.85E-17 |
| AL008718.3  | 0.107125 | 0.340629 | 1.668909 | 2.00E-05 | 4.11E-05 |
| AC145285.2  | 0.220811 | 0.477184 | 1.111737 | 9.00E-12 | 4.61E-11 |
| AC004975.2  | 0.186164 | 0.444295 | 1.25494  | 9.44E-06 | 2.05E-05 |
| SNHG12      | 2.356605 | 5.288872 | 1.16625  | 2.38E-13 | 1.48E-12 |
| AC117382.2  | 0.006331 | 0.022039 | 1.799607 | 4.97E-06 | 1.12E-05 |
| AC129510.2  | 0.048338 | 0.161933 | 1.744157 | 0.00033  | 0.000569 |
| LINC00858   | 0.012917 | 0.47176  | 5.190737 | 2.31E-08 | 7.33E-08 |
| AC133540.1  | 0.024241 | 0.201154 | 3.052766 | 7.15E-05 | 0.000136 |
| AF117829.1  | 0.473727 | 1.029367 | 1.119631 | 3.00E-07 | 8.09E-07 |
| AC034206.1  | 0.010827 | 0.179958 | 4.054914 | 6.85E-10 | 2.66E-09 |
| DPYD-IT1    | 0.033009 | 0.174363 | 2.401175 | 0.029444 | 0.037681 |
| AC005355.1  | 0.041659 | 0.118355 | 1.506424 | 0.000255 | 0.000447 |
| AC027601.1  | 0.152255 | 0.338041 | 1.150707 | 1.01E-08 | 3.35E-08 |
| AC015987.1  | 0.114541 | 0.319972 | 1.482083 | 0.000548 | 0.00092  |
| AC008655.2  | 0.192147 | 0.457903 | 1.25283  | 5.04E-08 | 1.53E-07 |
| AC079384.1  | 0.091824 | 1.317633 | 3.842926 | 0.0082   | 0.011441 |
| MCM3AP-AS1  | 0.329631 | 0.697917 | 1.082203 | 1.31E-11 | 6.56E-11 |
| AP005233.2  | 0.028867 | 2.062583 | 6.158869 | 5.17E-19 | 7.39E-18 |

|            |          |          |          |          |          |
|------------|----------|----------|----------|----------|----------|
| SIDT1-AS1  | 0.04645  | 0.209475 | 2.173023 | 0.024477 | 0.031684 |
| TH2LCRR    | 0.116772 | 0.335972 | 1.524645 | 0.000366 | 0.000629 |
| LINC00460  | 0.115627 | 2.553053 | 4.464673 | 6.10E-12 | 3.19E-11 |
| LINC01376  | 0.296035 | 0.687404 | 1.215391 | 1.46E-10 | 6.24E-10 |
| AL139289.1 | 0.418365 | 0.991562 | 1.244939 | 8.31E-11 | 3.68E-10 |
| LINC02280  | 0.008061 | 0.033535 | 2.056604 | 6.99E-12 | 3.64E-11 |
| AC108134.1 | 0.372643 | 0.812922 | 1.125322 | 2.20E-06 | 5.22E-06 |
| LINC01108  | 0.685455 | 0.338305 | -1.01874 | 8.07E-07 | 2.05E-06 |
| LINC01732  | 0.195692 | 0.074464 | -1.39397 | 0.000159 | 0.000287 |
| AC011287.1 | 0.009504 | 0.066076 | 2.797465 | 6.65E-05 | 0.000127 |
| AC004477.1 | 0.071668 | 0.222974 | 1.637479 | 1.60E-14 | 1.18E-13 |
| AC017076.1 | 0.101783 | 0.273459 | 1.425823 | 0.000589 | 0.000985 |
| AL137793.1 | 0.181244 | 0.612136 | 1.755918 | 0.001904 | 0.00294  |
| AC016924.1 | 0.565229 | 0.207389 | -1.4465  | 7.89E-21 | 1.38E-19 |
| AC089999.2 | 0.072191 | 0.472535 | 2.710535 | 1.81E-14 | 1.34E-13 |
| AC006206.2 | 0.06473  | 0.645711 | 3.318392 | 0.000227 | 0.000402 |
| UBE2R2-AS1 | 0.083444 | 0.280273 | 1.747957 | 0.0001   | 0.000187 |
| AC005021.1 | 0.308149 | 0.762398 | 1.306915 | 0.000656 | 0.001087 |
| AC114284.1 | 0.070977 | 0.150372 | 1.083117 | 4.53E-06 | 1.03E-05 |
| AC017074.1 | 0.503179 | 1.19689  | 1.250148 | 1.60E-10 | 6.79E-10 |
| AC010336.2 | 0.067197 | 0.163459 | 1.282458 | 4.04E-06 | 9.22E-06 |
| FAM225B    | 0.029756 | 0.085197 | 1.517646 | 3.99E-10 | 1.59E-09 |
| AL356417.2 | 0.068443 | 0.375415 | 2.455506 | 5.89E-14 | 4.02E-13 |
| AL022067.1 | 0.210326 | 0.688163 | 1.710122 | 0.000331 | 0.000571 |
| AC010328.1 | 0.004623 | 0.075257 | 4.024959 | 1.20E-12 | 6.91E-12 |
| AC090409.1 | 0.348437 | 0.16349  | -1.0917  | 7.66E-15 | 5.98E-14 |
| AP001781.1 | 0.043227 | 0.196499 | 2.184509 | 0.002222 | 0.003389 |
| AC007966.1 | 0.03465  | 0.097692 | 1.495382 | 0.029967 | 0.038319 |
| AC010643.1 | 0.16364  | 0.58897  | 1.847667 | 0.000174 | 0.000312 |
| AC012360.1 | 0.043877 | 0.113803 | 1.375012 | 0.000112 | 0.000208 |
| LINC00624  | 0.051282 | 0.353668 | 2.785881 | 9.32E-19 | 1.28E-17 |
| AC105398.1 | 0.070446 | 0.030317 | -1.2164  | 3.56E-12 | 1.92E-11 |
| LINC01891  | 0.024836 | 0.06836  | 1.460706 | 0.000233 | 0.000412 |
| AC145285.3 | 0.111535 | 0.270335 | 1.277255 | 4.24E-07 | 1.12E-06 |
| AC010168.2 | 0.3103   | 0.720158 | 1.214648 | 1.49E-07 | 4.20E-07 |
| AP001628.1 | 0.180454 | 0.708271 | 1.972671 | 2.05E-09 | 7.38E-09 |
| CU639417.4 | 0.00166  | 0.025206 | 3.924389 | 1.05E-11 | 5.34E-11 |
| AL136528.1 | 0.058752 | 0.165311 | 1.492483 | 0.000103 | 0.000192 |
| AC073842.2 | 0.256164 | 0.876917 | 1.77537  | 1.14E-14 | 8.61E-14 |
| AC022784.1 | 0.056223 | 1.625497 | 4.853575 | 1.67E-21 | 3.20E-20 |
| LINC01983  | 0.060497 | 0.928652 | 3.940209 | 1.73E-14 | 1.27E-13 |
| AC012555.1 | 0.057032 | 0.189543 | 1.732687 | 4.62E-10 | 1.83E-09 |
| LINC00884  | 0.256502 | 0.877088 | 1.773753 | 7.86E-16 | 7.05E-15 |
| LINC01583  | 0.007244 | 0.040511 | 2.483535 | 1.80E-08 | 5.80E-08 |

|            |          |          |          |          |          |
|------------|----------|----------|----------|----------|----------|
| AL136172.1 | 0.009025 | 0.027633 | 1.614425 | 9.16E-06 | 1.99E-05 |
| AL442125.2 | 0.236082 | 0.525836 | 1.155324 | 0.01741  | 0.023029 |
| AC112206.2 | 0.9271   | 0.16407  | -2.49841 | 1.56E-28 | 1.31E-26 |
| AC024361.3 | 0.170164 | 0.455946 | 1.421934 | 1.37E-08 | 4.46E-08 |
| HIF1A-AS1  | 0.088973 | 0.186598 | 1.068493 | 0.004592 | 0.006667 |
| AC104211.1 | 0.353548 | 0.052894 | -2.74072 | 2.07E-23 | 5.35E-22 |
| AC073573.1 | 0.021814 | 0.052889 | 1.277741 | 0.000143 | 0.000261 |
| AC025171.3 | 0.242837 | 0.573601 | 1.240058 | 3.23E-05 | 6.42E-05 |
| LINC00482  | 0.694863 | 1.801841 | 1.374671 | 1.27E-05 | 2.71E-05 |
| AC007991.4 | 0.132736 | 0.50077  | 1.915592 | 0.000218 | 0.000387 |
| LINC01270  | 0.14927  | 1.221912 | 3.033143 | 2.66E-28 | 2.06E-26 |
| AC114956.1 | 0.107102 | 0.257532 | 1.265769 | 3.13E-05 | 6.24E-05 |
| AL512353.1 | 0.300336 | 0.650067 | 1.114012 | 2.29E-05 | 4.69E-05 |
| LINC00337  | 0.05204  | 0.445632 | 3.098156 | 9.01E-19 | 1.25E-17 |
| LINC00115  | 0.219445 | 0.685291 | 1.642855 | 4.05E-19 | 5.89E-18 |
| RBAKDN     | 0.061199 | 0.2813   | 2.200535 | 0.034099 | 0.043176 |
| MIR181A1HG | 0.016058 | 0.299262 | 4.220025 | 0.000751 | 0.001232 |
| AC012213.1 | 0.002717 | 0.27164  | 6.643379 | 2.83E-09 | 9.98E-09 |
| AC012146.3 | 0.058506 | 0.127807 | 1.127299 | 0.002273 | 0.003463 |
| AC138393.3 | 0.12134  | 0.751774 | 2.631242 | 2.19E-16 | 2.14E-15 |
| MHENCN     | 2.426738 | 5.115366 | 1.075819 | 6.84E-09 | 2.32E-08 |
| AC008114.1 | 0.038474 | 0.113795 | 1.564499 | 0.012905 | 0.017457 |
| AC113382.1 | 0.017209 | 0.036851 | 1.098557 | 0.00011  | 0.000203 |
| AC010207.1 | 0.370003 | 0.125592 | -1.5588  | 9.76E-18 | 1.17E-16 |
| AL356299.2 | 0.092726 | 0.394851 | 2.090256 | 1.58E-16 | 1.57E-15 |
| LINC02154  | 3.963764 | 0.430078 | -3.2042  | 8.08E-30 | 8.81E-28 |
| AC105219.1 | 0.069521 | 0.604901 | 3.12117  | 1.27E-13 | 8.22E-13 |
| DRAIC      | 0.236652 | 3.906401 | 4.045003 | 0.001832 | 0.00284  |
| AC008691.1 | 0.123297 | 0.303802 | 1.300999 | 0.009806 | 0.013511 |
| RNF139-AS1 | 0.132294 | 0.387082 | 1.548891 | 8.78E-15 | 6.75E-14 |
| LINC02003  | 0.003504 | 0.095117 | 4.762713 | 2.28E-18 | 2.97E-17 |
| AP003717.1 | 0.190714 | 0.695796 | 1.867253 | 5.02E-08 | 1.52E-07 |
| AC092384.1 | 0.12896  | 0.039927 | -1.69149 | 1.03E-22 | 2.38E-21 |
| AC011465.1 | 0.150194 | 0.462069 | 1.621283 | 0.001879 | 0.002906 |
| AC010307.4 | 0.038262 | 0.296542 | 2.954237 | 1.68E-06 | 4.08E-06 |
| AC106881.1 | 0.289796 | 0.141805 | -1.03113 | 6.14E-17 | 6.56E-16 |
| LINC02246  | 0.026521 | 0.103055 | 1.958231 | 2.30E-05 | 4.70E-05 |
| AC131009.1 | 0.165734 | 0.524946 | 1.663299 | 1.51E-12 | 8.55E-12 |
| AC108134.3 | 2.15127  | 0.872072 | -1.30267 | 2.05E-19 | 3.06E-18 |
| BMS1P4     | 0.140583 | 0.318424 | 1.179531 | 7.03E-11 | 3.15E-10 |
| AC011676.1 | 0.142727 | 0.559193 | 1.970083 | 1.29E-14 | 9.71E-14 |
| AC093151.2 | 0.219209 | 0.535633 | 1.288937 | 0.000149 | 0.00027  |
| AC006017.1 | 0.137818 | 0.555759 | 2.011697 | 2.69E-11 | 1.30E-10 |
| AC109460.2 | 0.567213 | 1.144199 | 1.012376 | 2.36E-08 | 7.48E-08 |

|             |          |          |          |          |          |
|-------------|----------|----------|----------|----------|----------|
| AC013264.1  | 7.094685 | 1.793646 | -1.98384 | 3.32E-13 | 2.03E-12 |
| LINC02202   | 0.21627  | 0.093902 | -1.2036  | 2.48E-18 | 3.21E-17 |
| LINC01287   | 0.007949 | 0.515889 | 6.020091 | 9.29E-06 | 2.02E-05 |
| AC048382.5  | 0.490876 | 0.232902 | -1.07564 | 8.09E-18 | 9.83E-17 |
| AL121832.3  | 0.056957 | 0.299867 | 2.396387 | 3.80E-21 | 6.95E-20 |
| LINC02197   | 0.040454 | 0.018284 | -1.1457  | 1.01E-16 | 1.04E-15 |
| AC107464.1  | 0.015636 | 0.063619 | 2.024588 | 0.009138 | 0.012662 |
| AC008610.1  | 0.725212 | 1.948916 | 1.426196 | 2.91E-13 | 1.79E-12 |
| LINC01116   | 0.316666 | 1.376561 | 2.120035 | 1.32E-05 | 2.80E-05 |
| AL583722.3  | 0.009735 | 0.031401 | 1.689599 | 0.000109 | 0.000202 |
| AP003500.1  | 0.006273 | 0.242948 | 5.275403 | 1.64E-09 | 6.00E-09 |
| AC245060.5  | 0.207692 | 0.423672 | 1.028501 | 6.42E-06 | 1.42E-05 |
| MAP3K20-AS1 | 0.092226 | 0.212181 | 1.202053 | 0.026245 | 0.033838 |
| AC016737.1  | 0.113428 | 0.473087 | 2.060326 | 3.53E-16 | 3.34E-15 |
| AC005281.1  | 0.112275 | 0.258869 | 1.20519  | 0.005742 | 0.008203 |
| AC026333.4  | 0.10081  | 0.259094 | 1.361841 | 1.91E-06 | 4.62E-06 |
| AC090579.1  | 0.266615 | 0.625505 | 1.230264 | 5.87E-07 | 1.51E-06 |
| AL355076.2  | 0.038971 | 0.20994  | 2.42951  | 3.75E-15 | 3.08E-14 |
| AC011462.4  | 0.505521 | 1.273792 | 1.333287 | 5.07E-10 | 2.00E-09 |
| AC018552.3  | 0.022319 | 0.116741 | 2.386975 | 0.000746 | 0.001225 |
| LINC01366   | 0.224434 | 0.10189  | -1.13928 | 3.36E-16 | 3.18E-15 |
| TMLHE-AS1   | 0.010955 | 0.049381 | 2.172423 | 2.18E-09 | 7.81E-09 |
| AL450270.1  | 0.190151 | 0.052736 | -1.85029 | 6.45E-14 | 4.38E-13 |
| AC061975.1  | 0.002835 | 0.035268 | 3.636752 | 1.96E-12 | 1.09E-11 |
| VCAN-AS1    | 0.026137 | 0.458244 | 4.131948 | 0.000129 | 0.000237 |
| ZNF436-AS1  | 0.424952 | 0.882754 | 1.054714 | 1.03E-12 | 5.97E-12 |
| AC010501.1  | 0.018525 | 0.048867 | 1.399418 | 0.000829 | 0.001354 |
| AP003390.1  | 0.107276 | 0.555847 | 2.373356 | 1.00E-14 | 7.63E-14 |
| AP001619.1  | 0.062062 | 0.260787 | 2.071085 | 6.70E-11 | 3.02E-10 |
| LINC02588   | 0.008277 | 0.577452 | 6.124389 | 3.12E-08 | 9.74E-08 |
| AC006064.3  | 0.064731 | 0.33073  | 2.353131 | 2.20E-16 | 2.14E-15 |
| AC009269.4  | 0.121097 | 0.05576  | -1.11886 | 4.34E-06 | 9.88E-06 |
| AL136307.1  | 0.057065 | 0.273802 | 2.262457 | 4.14E-08 | 1.27E-07 |
| LINC01634   | 0.013041 | 0.052508 | 2.00952  | 0.000605 | 0.00101  |
| AL049747.1  | 0.017484 | 0.052792 | 1.594295 | 0.001376 | 0.002173 |
| AL354989.1  | 0.221565 | 0.594906 | 1.424932 | 8.12E-09 | 2.72E-08 |
| LINC01506   | 1.007719 | 0.195781 | -2.36378 | 1.51E-27 | 9.18E-26 |
| AC010271.2  | 0.01718  | 0.071543 | 2.0581   | 2.35E-07 | 6.45E-07 |
| AC007663.2  | 0.186257 | 0.080184 | -1.21592 | 5.54E-13 | 3.29E-12 |
| AC006435.2  | 0.573402 | 1.187418 | 1.050211 | 1.14E-05 | 2.45E-05 |
| LINC00578   | 0.788013 | 2.14358  | 1.443731 | 2.81E-07 | 7.60E-07 |
| LINC01344   | 0.005657 | 0.045945 | 3.021908 | 3.68E-08 | 1.14E-07 |
| CNTN4-AS1   | 0.036507 | 0.018221 | -1.00257 | 8.22E-07 | 2.08E-06 |
| C1orf140    | 0.054937 | 0.010297 | -2.41551 | 4.47E-26 | 2.01E-24 |

|            |          |          |          |          |          |
|------------|----------|----------|----------|----------|----------|
| LINC02373  | 0.035143 | 0.079589 | 1.179314 | 0.008719 | 0.012108 |
| AC244100.2 | 0.009693 | 0.004626 | -1.06719 | 1.03E-05 | 2.22E-05 |
| LINC02036  | 0.262499 | 1.121197 | 2.094658 | 4.15E-08 | 1.27E-07 |
| AL024508.2 | 0.161522 | 0.713051 | 2.142279 | 4.19E-17 | 4.59E-16 |
| CDKN2A-DT  | 0.007974 | 0.08591  | 3.429457 | 5.37E-07 | 1.40E-06 |
| AC100771.2 | 0.021571 | 0.092644 | 2.102612 | 6.45E-11 | 2.91E-10 |
| AC016575.1 | 0.030012 | 0.096476 | 1.684611 | 2.42E-05 | 4.92E-05 |
| LINC00824  | 0.007785 | 0.151585 | 4.283351 | 0.001939 | 0.00299  |
| AC020916.2 | 0.093374 | 0.262243 | 1.489806 | 0.001961 | 0.003023 |
| Z98885.3   | 0.10628  | 0.253454 | 1.253861 | 0.005218 | 0.00752  |
| AC090125.1 | 0.005742 | 0.158311 | 4.785054 | 2.66E-09 | 9.42E-09 |
| LINC01616  | 0.109707 | 0.012521 | -3.13121 | 1.51E-25 | 6.22E-24 |
| SNHG3      | 2.575382 | 8.341415 | 1.695506 | 5.59E-21 | 9.93E-20 |
| AL121829.2 | 0.040369 | 0.150248 | 1.896032 | 1.98E-06 | 4.76E-06 |
| LINC02580  | 0.343151 | 0.147987 | -1.21337 | 2.17E-17 | 2.47E-16 |
| AC026356.1 | 0.490574 | 1.083948 | 1.143752 | 3.14E-09 | 1.10E-08 |
| AC104667.2 | 0.563797 | 1.195886 | 1.084834 | 9.70E-10 | 3.67E-09 |
| AP001893.1 | 0.234062 | 0.505028 | 1.109472 | 0.000291 | 0.000506 |
| AC021755.3 | 0.068154 | 0.137196 | 1.009361 | 0.0023   | 0.003501 |
| AC243830.1 | 0.018533 | 0.278455 | 3.909302 | 3.55E-15 | 2.93E-14 |
| AL139412.1 | 0.022719 | 0.500491 | 4.461375 | 1.11E-20 | 1.89E-19 |
| AC011498.6 | 0.260924 | 0.56074  | 1.103702 | 1.72E-06 | 4.16E-06 |
| AC027281.1 | 1.32626  | 0.308556 | -2.10376 | 1.19E-09 | 4.44E-09 |
| LINC01730  | 0.286363 | 0.694123 | 1.277347 | 0.01735  | 0.02296  |
| AC012640.2 | 0.740052 | 2.271779 | 1.618124 | 7.93E-19 | 1.11E-17 |
| AC021218.1 | 0.039347 | 0.285746 | 2.860388 | 7.54E-05 | 0.000143 |
| AC128709.1 | 0.255031 | 0.101288 | -1.33222 | 1.22E-18 | 1.65E-17 |
| AC012377.1 | 0.005551 | 0.011454 | 1.0452   | 0.001296 | 0.002054 |
| AL513365.2 | 0.27991  | 0.587505 | 1.069639 | 0.006175 | 0.00879  |
| FLJ42969   | 0.02635  | 0.115628 | 2.133593 | 6.32E-05 | 0.000122 |
| AL138889.1 | 0.001433 | 0.00398  | 1.474086 | 0.010086 | 0.013864 |
| AP002856.2 | 2.008729 | 0.127822 | -3.97407 | 1.33E-13 | 8.58E-13 |
| AC025171.4 | 0.541375 | 1.154851 | 1.093007 | 0.000225 | 0.000399 |
| AC016885.2 | 0.310836 | 0.047025 | -2.72464 | 1.04E-26 | 5.28E-25 |
| PARD3-AS1  | 0.235607 | 0.602962 | 1.355682 | 5.02E-06 | 1.13E-05 |
| LINC02418  | 0.002783 | 0.706675 | 7.98813  | 0.000151 | 0.000273 |
| AL355075.2 | 0.54507  | 1.115704 | 1.033441 | 6.33E-05 | 0.000122 |
| AC002066.1 | 0.974452 | 0.300981 | -1.69492 | 1.23E-24 | 4.07E-23 |
| AL513327.3 | 0.148525 | 0.464924 | 1.646287 | 0.000459 | 0.000777 |
| MATN1-AS1  | 0.226904 | 0.482633 | 1.088841 | 2.33E-11 | 1.13E-10 |
| AC092718.1 | 0.027331 | 0.057231 | 1.066283 | 0.01244  | 0.016854 |
| LINC00163  | 0.454798 | 0.04683  | -3.27972 | 1.16E-30 | 1.86E-28 |
| AC009955.4 | 0.088405 | 0.203699 | 1.204241 | 0.008597 | 0.011954 |
| AC093607.1 | 0.100129 | 0.025899 | -1.95091 | 5.74E-10 | 2.25E-09 |

|             |          |          |          |          |          |
|-------------|----------|----------|----------|----------|----------|
| RAMP2-AS1   | 0.913051 | 0.297458 | -1.61801 | 4.18E-24 | 1.26E-22 |
| AL513327.1  | 0.506119 | 1.155684 | 1.191199 | 1.45E-05 | 3.05E-05 |
| CU634019.6  | 0.006246 | 0.022904 | 1.874637 | 2.93E-06 | 6.81E-06 |
| AP000688.1  | 0.103118 | 0.288343 | 1.483495 | 0.000153 | 0.000276 |
| AL360270.3  | 0.083731 | 0.186742 | 1.157209 | 2.49E-10 | 1.03E-09 |
| AC011298.1  | 0.002049 | 0.323856 | 7.303975 | 5.57E-10 | 2.18E-09 |
| AC004551.1  | 0.023075 | 0.10062  | 2.124482 | 0.000715 | 0.001176 |
| AL731533.2  | 0.126757 | 0.642337 | 2.341264 | 1.62E-16 | 1.61E-15 |
| STAM-AS1    | 0.069519 | 0.189777 | 1.448812 | 5.88E-11 | 2.67E-10 |
| AC099811.5  | 0.029567 | 0.205009 | 2.793608 | 0.039839 | 0.049885 |
| AC087521.1  | 0.926068 | 0.167593 | -2.46615 | 3.47E-22 | 7.35E-21 |
| AC083967.1  | 0.030832 | 0.216248 | 2.810184 | 5.48E-05 | 0.000106 |
| AC139887.1  | 0.472598 | 1.450854 | 1.618217 | 4.18E-11 | 1.95E-10 |
| AP000302.1  | 0.02599  | 0.065542 | 1.334466 | 0.001898 | 0.002932 |
| DSCAS       | 0.049148 | 0.122252 | 1.314646 | 7.53E-06 | 1.66E-05 |
| AC068631.1  | 0.004224 | 0.016388 | 1.955845 | 9.28E-12 | 4.75E-11 |
| LINC02031   | 0.123421 | 0.059537 | -1.05172 | 3.24E-06 | 7.47E-06 |
| LINC00973   | 0.024507 | 1.978517 | 6.33506  | 4.52E-08 | 1.38E-07 |
| AC007255.1  | 0.129767 | 0.399259 | 1.621397 | 0.004793 | 0.006936 |
| AC023355.1  | 0.048679 | 0.101005 | 1.053055 | 1.75E-06 | 4.24E-06 |
| LINC01704   | 0.014889 | 0.03194  | 1.101075 | 0.000767 | 0.001256 |
| TRMT2B-AS1  | 0.058919 | 0.127725 | 1.116228 | 0.01538  | 0.020523 |
| LINC01971   | 0.006382 | 0.095837 | 3.90847  | 3.87E-13 | 2.34E-12 |
| AC125807.2  | 3.027995 | 0.747481 | -2.01825 | 5.67E-28 | 3.83E-26 |
| AC244197.2  | 0.308715 | 0.667089 | 1.111602 | 0.00178  | 0.002766 |
| BCAR4       | 0.006478 | 0.778133 | 6.908313 | 2.96E-05 | 5.93E-05 |
| LINC02535   | 0.011289 | 0.256741 | 4.507354 | 5.40E-24 | 1.58E-22 |
| AC020907.1  | 0.012477 | 0.920209 | 6.204609 | 1.29E-27 | 8.00E-26 |
| AC016738.2  | 0.009803 | 0.057396 | 2.5496   | 1.09E-06 | 2.71E-06 |
| AC091212.1  | 0.037631 | 0.213485 | 2.504156 | 6.29E-06 | 1.40E-05 |
| AC010331.1  | 0.131171 | 0.420339 | 1.680102 | 4.92E-10 | 1.94E-09 |
| AC006449.5  | 0.135439 | 0.464262 | 1.777289 | 3.61E-19 | 5.29E-18 |
| DARS-AS1    | 0.097103 | 0.418528 | 2.107741 | 1.71E-30 | 2.60E-28 |
| AC021086.1  | 0.02888  | 0.063123 | 1.128102 | 0.000743 | 0.00122  |
| AC009268.2  | 0.149919 | 0.322386 | 1.104612 | 0.000879 | 0.001429 |
| AC027228.2  | 0.05183  | 0.830841 | 4.002704 | 4.64E-26 | 2.06E-24 |
| AL158151.2  | 0.039751 | 0.097261 | 1.290883 | 0.00193  | 0.002979 |
| AC132192.1  | 0.076806 | 0.377963 | 2.298951 | 1.79E-12 | 1.01E-11 |
| AL844908.1  | 0.348856 | 2.983842 | 3.096467 | 4.48E-13 | 2.70E-12 |
| AC009806.1  | 0.759002 | 0.163621 | -2.21375 | 1.27E-25 | 5.29E-24 |
| AC020663.2  | 0.110042 | 0.690848 | 2.650313 | 1.67E-22 | 3.67E-21 |
| TBL1XR1-AS1 | 0.014475 | 0.360497 | 4.638378 | 9.74E-08 | 2.83E-07 |
| LINC01134   | 0.080749 | 0.246862 | 1.612192 | 8.28E-13 | 4.84E-12 |
| AC012645.1  | 0.585365 | 1.816939 | 1.634102 | 0.00033  | 0.000569 |

|            |          |          |          |          |          |
|------------|----------|----------|----------|----------|----------|
| AJ011932.1 | 0.401313 | 0.151752 | -1.40302 | 5.90E-18 | 7.29E-17 |
| AL450306.1 | 0.066734 | 0.169095 | 1.341342 | 2.30E-08 | 7.31E-08 |
| AC103739.1 | 0.192666 | 0.450556 | 1.225604 | 0.002418 | 0.003671 |
| ITFG1-AS1  | 0.155502 | 0.338257 | 1.121184 | 2.87E-06 | 6.70E-06 |
| AC092338.2 | 0.020335 | 0.072947 | 1.842899 | 4.60E-05 | 9.03E-05 |
| Z82188.2   | 0.0398   | 0.154252 | 1.954435 | 2.10E-11 | 1.02E-10 |
| AP001189.1 | 2.288457 | 0.289995 | -2.98027 | 9.50E-26 | 4.05E-24 |
| LHFPL3-AS2 | 10.95965 | 2.941762 | -1.89745 | 8.17E-25 | 2.77E-23 |
| LINC01615  | 0.073887 | 0.400679 | 2.439063 | 8.44E-16 | 7.54E-15 |
| LINC01338  | 0.030448 | 0.101093 | 1.731287 | 0.028429 | 0.036465 |
| LINC01281  | 0.042504 | 0.176974 | 2.057873 | 3.64E-14 | 2.58E-13 |
| AC008105.3 | 0.622611 | 1.537614 | 1.30429  | 2.00E-07 | 5.53E-07 |
| MANCR      | 0.028027 | 0.241294 | 3.105892 | 5.88E-06 | 1.31E-05 |
| AC009102.2 | 0.012559 | 0.029611 | 1.237388 | 0.005502 | 0.00789  |
| AC007906.1 | 0.04803  | 0.258982 | 2.430844 | 0.004049 | 0.005934 |
| LINC01169  | 0.660719 | 0.156967 | -2.07358 | 5.12E-21 | 9.18E-20 |
| AL158839.1 | 0.056692 | 0.253147 | 2.158753 | 6.68E-11 | 3.01E-10 |
| AC093510.2 | 0.349327 | 0.117365 | -1.57358 | 3.23E-22 | 6.87E-21 |
| AC138932.5 | 0.22016  | 0.690505 | 1.649102 | 2.20E-07 | 6.04E-07 |
| AC020656.2 | 0.041832 | 0.12605  | 1.591328 | 0.011604 | 0.015796 |
| AC025822.2 | 0.041739 | 0.019805 | -1.0755  | 6.00E-11 | 2.72E-10 |
| AC124276.2 | 0.072129 | 0.177131 | 1.296155 | 0.022255 | 0.029018 |
| AC148476.1 | 0.098368 | 0.386148 | 1.972889 | 2.15E-06 | 5.12E-06 |
| AGAP11     | 0.13741  | 0.035991 | -1.93278 | 1.04E-15 | 9.13E-15 |
| AC004870.2 | 0.011986 | 0.34248  | 4.836635 | 1.76E-13 | 1.12E-12 |
| AL109923.1 | 0.025163 | 0.181862 | 2.85349  | 0.004853 | 0.007015 |
| LINC01571  | 0.612155 | 0.152134 | -2.00855 | 1.03E-11 | 5.25E-11 |
| AC091563.1 | 2.104304 | 4.686152 | 1.155061 | 2.00E-09 | 7.21E-09 |
| AC008764.8 | 0.153885 | 0.39687  | 1.366814 | 6.89E-13 | 4.06E-12 |
| CEP83-DT   | 0.100872 | 0.224156 | 1.151971 | 1.04E-10 | 4.57E-10 |
| AC008937.1 | 0.014566 | 0.04192  | 1.525076 | 6.48E-06 | 1.44E-05 |
| AC023154.1 | 0.007649 | 0.058314 | 2.930565 | 0.00117  | 0.001869 |
| AP001094.1 | 0.399734 | 0.153877 | -1.37726 | 3.56E-15 | 2.93E-14 |
| AC090673.1 | 0.012572 | 0.187732 | 3.900387 | 4.81E-18 | 6.00E-17 |
| Z83851.2   | 0.297673 | 0.833306 | 1.485119 | 1.11E-18 | 1.52E-17 |
| AL136985.2 | 0.120082 | 0.246066 | 1.035021 | 0.000477 | 0.000806 |
| AC243960.3 | 0.834174 | 0.307186 | -1.44123 | 1.39E-17 | 1.63E-16 |
| DNAH17-AS1 | 0.046206 | 0.153187 | 1.729126 | 1.96E-06 | 4.72E-06 |
| AL117379.1 | 0.394227 | 1.282527 | 1.701891 | 4.55E-16 | 4.18E-15 |
| AL133284.1 | 0.003124 | 0.132726 | 5.408693 | 1.13E-09 | 4.26E-09 |
| LINC02244  | 0.730295 | 0.314623 | -1.21485 | 2.23E-06 | 5.28E-06 |
| LINC02099  | 0.013643 | 0.048266 | 1.822829 | 2.25E-17 | 2.54E-16 |
| LINC00158  | 0.016336 | 0.047029 | 1.525463 | 5.79E-05 | 0.000112 |
| LINC02332  | 0.019514 | 0.387722 | 4.312464 | 1.38E-23 | 3.65E-22 |



|            |          |          |          |          |          |
|------------|----------|----------|----------|----------|----------|
| AL035461.2 | 0.80014  | 1.741213 | 1.121769 | 7.96E-10 | 3.06E-09 |
| AC011632.1 | 0.004255 | 0.175379 | 5.365279 | 0.000595 | 0.000994 |
| AC003965.2 | 0.260302 | 1.192344 | 2.195543 | 1.05E-11 | 5.34E-11 |
| PACERR     | 0.155157 | 0.570389 | 1.878215 | 1.07E-06 | 2.67E-06 |
| EIPR1-IT1  | 0.089108 | 0.323538 | 1.860305 | 5.08E-08 | 1.54E-07 |
| AL449423.1 | 0.032678 | 0.1077   | 1.720611 | 0.003558 | 0.005267 |
| AC115284.1 | 0.006264 | 0.031007 | 2.307421 | 5.17E-07 | 1.35E-06 |
| AC012485.2 | 0.100648 | 0.311239 | 1.628705 | 0.028387 | 0.036418 |
| LINC01150  | 1.4661   | 0.59146  | -1.30963 | 6.54E-17 | 6.95E-16 |
| AC046195.1 | 1.188577 | 0.246354 | -2.27043 | 2.75E-26 | 1.29E-24 |
| TMEM51-AS1 | 0.106742 | 0.403755 | 1.919356 | 2.29E-18 | 2.97E-17 |
| PKNOX2-AS1 | 0.055336 | 0.0146   | -1.92224 | 1.78E-09 | 6.50E-09 |
| LINC01843  | 0.233793 | 1.123967 | 2.265298 | 1.34E-09 | 4.95E-09 |
| AP000851.2 | 0.026437 | 0.204819 | 2.953692 | 0.024269 | 0.031453 |
| SPAG5-AS1  | 0.22555  | 0.469319 | 1.057124 | 2.14E-10 | 8.90E-10 |
| LINC00881  | 0.157566 | 0.339107 | 1.10578  | 0.001451 | 0.002279 |
| AL583805.2 | 0.057903 | 0.021137 | -1.45388 | 3.64E-13 | 2.21E-12 |
| AC022028.2 | 0.007144 | 0.051245 | 2.842538 | 3.63E-07 | 9.67E-07 |
| AC114296.1 | 0.02598  | 0.269971 | 3.377342 | 1.03E-07 | 2.97E-07 |
| AC093591.2 | 0.011309 | 0.049235 | 2.122247 | 0.001101 | 0.001766 |
| AC125603.4 | 0.005032 | 0.024225 | 2.267184 | 6.15E-06 | 1.37E-05 |
| AL354726.1 | 0.060294 | 0.281277 | 2.221906 | 0.001288 | 0.002043 |
| LINC02477  | 0.003536 | 0.048124 | 3.76666  | 4.40E-07 | 1.16E-06 |
| AP000265.1 | 0.010327 | 0.024179 | 1.227283 | 0.012583 | 0.017036 |
| AC010615.2 | 0.203943 | 0.712223 | 1.804162 | 4.71E-05 | 9.23E-05 |
| LINC02422  | 0.099451 | 0.29603  | 1.573689 | 6.41E-05 | 0.000123 |
| AL031665.1 | 0.145929 | 0.048067 | -1.60214 | 5.32E-13 | 3.17E-12 |
| AC021192.1 | 0.063701 | 0.024028 | -1.4066  | 1.36E-08 | 4.44E-08 |
| Z83851.1   | 0.826695 | 2.409685 | 1.543418 | 3.09E-28 | 2.31E-26 |
| AC009005.1 | 0.657538 | 3.128304 | 2.250235 | 5.03E-22 | 1.02E-20 |
| AP003119.3 | 0.196735 | 0.776718 | 1.981136 | 2.06E-11 | 1.00E-10 |
| LINC02562  | 0.675246 | 3.376489 | 2.322039 | 5.99E-12 | 3.14E-11 |
| AP001626.1 | 0.015739 | 0.121801 | 2.952153 | 3.08E-12 | 1.67E-11 |
| AL590683.1 | 0.026467 | 0.012527 | -1.07918 | 0.000262 | 0.000458 |
| AL355802.2 | 0.247788 | 0.631562 | 1.349819 | 3.74E-12 | 2.02E-11 |
| AL391069.2 | 0.380334 | 0.992862 | 1.384327 | 1.43E-18 | 1.91E-17 |
| AP003031.1 | 0.009042 | 0.074121 | 3.035179 | 3.57E-10 | 1.43E-09 |
| AP005136.2 | 0.201743 | 0.419535 | 1.056277 | 1.53E-06 | 3.72E-06 |
| TDRKH-AS1  | 0.244094 | 1.070763 | 2.133131 | 4.14E-26 | 1.91E-24 |
| ERVK-28    | 0.004028 | 0.095597 | 4.568777 | 1.62E-10 | 6.89E-10 |
| AC008687.2 | 0.0246   | 0.10826  | 2.137793 | 1.73E-05 | 3.59E-05 |
| DDX39B-AS1 | 0.043066 | 0.11288  | 1.390184 | 3.01E-07 | 8.09E-07 |
| LINC02158  | 0.386453 | 0.161696 | -1.25701 | 1.29E-23 | 3.42E-22 |
| AL008723.1 | 0.132848 | 0.467925 | 1.816499 | 6.80E-06 | 1.50E-05 |

|            |          |          |          |          |          |
|------------|----------|----------|----------|----------|----------|
| AC005522.1 | 0.040467 | 0.305491 | 2.916297 | 0.000282 | 0.000491 |
| AC007285.2 | 0.056101 | 0.478144 | 3.091358 | 4.64E-22 | 9.49E-21 |
| LINC02320  | 0.114582 | 0.425099 | 1.891414 | 8.05E-09 | 2.70E-08 |
| AC010422.4 | 0.11723  | 0.344292 | 1.554293 | 0.000208 | 0.000369 |
| IER3-AS1   | 0.331856 | 0.726626 | 1.130654 | 1.07E-10 | 4.67E-10 |
| SNHG1      | 3.418572 | 11.15734 | 1.706527 | 7.65E-25 | 2.63E-23 |
| AL359764.1 | 0.009125 | 0.25887  | 4.826251 | 7.50E-09 | 2.53E-08 |
| LINC00501  | 0.005601 | 0.323507 | 5.852079 | 8.48E-12 | 4.37E-11 |
| AC104237.1 | 0.069502 | 0.025986 | -1.4193  | 6.10E-11 | 2.76E-10 |
| AL731569.1 | 0.116378 | 0.270782 | 1.218307 | 1.79E-12 | 1.01E-11 |
| AC010168.1 | 0.067428 | 0.37047  | 2.45793  | 4.47E-10 | 1.77E-09 |
| HAR1B      | 0.084686 | 0.445339 | 2.394706 | 0.000683 | 0.001127 |
| LYRM4-AS1  | 0.396955 | 0.906636 | 1.191549 | 4.85E-17 | 5.25E-16 |
| AC127164.1 | 0.022684 | 0.16461  | 2.859278 | 8.20E-10 | 3.14E-09 |
| Z83844.2   | 0.030525 | 0.079028 | 1.372365 | 2.44E-07 | 6.67E-07 |
| AC104462.1 | 0.065985 | 0.23014  | 1.802301 | 1.23E-06 | 3.03E-06 |
| AP003548.1 | 0.126936 | 0.036514 | -1.79757 | 1.15E-18 | 1.57E-17 |
| AC090589.2 | 0.040701 | 0.205634 | 2.336935 | 0.003735 | 0.005501 |
| AP001025.1 | 0.019558 | 0.149084 | 2.93027  | 0.014049 | 0.018897 |
| LINC01393  | 0.044402 | 0.201812 | 2.184322 | 5.87E-12 | 3.09E-11 |
| AL139039.3 | 0.023476 | 0.091774 | 1.966914 | 7.46E-08 | 2.21E-07 |
| AC005291.2 | 0.032974 | 0.334307 | 3.341758 | 4.85E-09 | 1.67E-08 |
| AC016394.1 | 0.544067 | 1.448017 | 1.412222 | 1.10E-14 | 8.35E-14 |
| AL365277.1 | 0.194888 | 0.800261 | 2.037828 | 1.95E-05 | 4.03E-05 |
| AC018467.1 | 0.063776 | 0.018061 | -1.82011 | 1.92E-10 | 8.03E-10 |
| AC114811.2 | 0.038011 | 0.13469  | 1.825158 | 1.74E-12 | 9.81E-12 |
| AC008278.2 | 0.258646 | 0.083067 | -1.63864 | 4.63E-07 | 1.22E-06 |
| LINC01429  | 0.002234 | 0.024413 | 3.450025 | 9.43E-08 | 2.75E-07 |
| AL359237.1 | 0.01519  | 0.005952 | -1.35177 | 5.14E-08 | 1.55E-07 |
| AL512306.2 | 0.15711  | 0.31888  | 1.021243 | 0.002702 | 0.004073 |
| AC099687.1 | 0.054824 | 0.021446 | -1.35408 | 2.55E-13 | 1.58E-12 |
| SMCR2      | 0.021671 | 0.091298 | 2.074841 | 7.20E-10 | 2.78E-09 |
| AC097359.3 | 0.03347  | 0.013073 | -1.35634 | 2.85E-06 | 6.65E-06 |
| AL445222.1 | 0.313847 | 0.734481 | 1.226666 | 1.26E-10 | 5.46E-10 |
| LINC01792  | 0.00247  | 0.04191  | 4.084913 | 3.11E-11 | 1.48E-10 |
| LINC01117  | 0.087932 | 0.317705 | 1.85323  | 0.000372 | 0.000637 |
| LINC00330  | 0.009708 | 0.053877 | 2.472488 | 2.55E-06 | 6.00E-06 |
| AC092802.2 | 0.123132 | 0.26186  | 1.088587 | 0.001404 | 0.002214 |
| AC007391.1 | 0.026356 | 0.061202 | 1.21543  | 0.002541 | 0.003843 |
| CPEB1-AS1  | 0.026956 | 0.011816 | -1.18985 | 2.27E-05 | 4.65E-05 |
| AL353807.2 | 0.058628 | 0.322544 | 2.459833 | 2.96E-14 | 2.13E-13 |
| PLCH1-AS2  | 0.030295 | 0.13745  | 2.181764 | 0.000243 | 0.000428 |
| AC027307.1 | 0.080454 | 0.211058 | 1.391409 | 4.54E-06 | 1.03E-05 |
| AP003119.1 | 0.054667 | 0.708072 | 3.695154 | 1.69E-05 | 3.51E-05 |

|             |          |          |          |          |          |
|-------------|----------|----------|----------|----------|----------|
| LINC02570   | 0.588438 | 0.058436 | -3.33195 | 1.31E-31 | 2.80E-29 |
| AC079062.1  | 0.011348 | 1.298726 | 6.838565 | 4.12E-14 | 2.89E-13 |
| AC020911.2  | 0.136019 | 0.051662 | -1.39664 | 3.43E-08 | 1.07E-07 |
| AP006621.4  | 0.255547 | 0.681251 | 1.414599 | 2.45E-05 | 4.98E-05 |
| AC104365.2  | 0.08824  | 0.033711 | -1.38819 | 1.92E-05 | 3.97E-05 |
| AC010632.1  | 0.054061 | 0.170618 | 1.658115 | 5.48E-07 | 1.42E-06 |
| AL139385.1  | 0.060049 | 0.236342 | 1.976659 | 1.61E-08 | 5.23E-08 |
| AC008669.1  | 1.760018 | 0.718384 | -1.29276 | 1.47E-24 | 4.78E-23 |
| AC025280.2  | 0.073092 | 0.028668 | -1.35025 | 8.09E-08 | 2.38E-07 |
| AC090164.3  | 0.00297  | 0.053677 | 4.175743 | 1.49E-11 | 7.40E-11 |
| AC099850.3  | 1.172631 | 6.783185 | 2.532214 | 7.83E-23 | 1.84E-21 |
| LINC01301   | 0.085888 | 0.219301 | 1.352389 | 1.59E-09 | 5.83E-09 |
| AC017100.1  | 0.24935  | 0.638021 | 1.35543  | 3.87E-05 | 7.64E-05 |
| AC018529.1  | 1.086103 | 0.220733 | -2.29879 | 6.22E-23 | 1.48E-21 |
| AL442224.1  | 0.071844 | 1.069923 | 3.896493 | 0.001863 | 0.002886 |
| CHKB-DT     | 0.594305 | 1.385503 | 1.221134 | 6.28E-14 | 4.27E-13 |
| AC098828.2  | 0.013992 | 0.047133 | 1.752102 | 8.29E-05 | 0.000157 |
| AL158166.1  | 0.829785 | 1.966222 | 1.244616 | 7.28E-05 | 0.000139 |
| LINC02544   | 0.086892 | 1.159096 | 3.737636 | 1.55E-20 | 2.58E-19 |
| AL391335.1  | 0.034617 | 0.076095 | 1.136336 | 0.021358 | 0.027937 |
| LINC02257   | 0.57298  | 3.022028 | 2.39896  | 1.19E-06 | 2.94E-06 |
| AP001893.3  | 0.019814 | 0.084778 | 2.097201 | 0.000118 | 0.000218 |
| AC132872.2  | 0.05252  | 0.144411 | 1.459245 | 1.90E-09 | 6.88E-09 |
| ZNF451-AS1  | 0.099322 | 0.234284 | 1.238072 | 0.01025  | 0.014077 |
| AC022167.4  | 0.018065 | 0.105956 | 2.55217  | 3.19E-11 | 1.52E-10 |
| AC087645.2  | 0.268766 | 0.591717 | 1.13856  | 1.10E-11 | 5.58E-11 |
| AL158068.2  | 0.020947 | 0.060569 | 1.531843 | 0.004994 | 0.007208 |
| AC100860.1  | 0.079323 | 0.205238 | 1.371489 | 0.020876 | 0.027369 |
| AC024941.2  | 0.356843 | 0.756678 | 1.084389 | 4.35E-08 | 1.33E-07 |
| AC097358.2  | 0.012078 | 0.115288 | 3.254811 | 2.51E-20 | 4.11E-19 |
| SNHG4       | 0.288969 | 1.537934 | 2.412007 | 1.54E-24 | 4.96E-23 |
| AC008840.1  | 0.091712 | 0.221228 | 1.270354 | 1.62E-07 | 4.53E-07 |
| ZNF252P-AS1 | 0.03817  | 0.169936 | 2.154496 | 4.11E-18 | 5.19E-17 |
| FARSA-AS1   | 0.045593 | 0.135417 | 1.570531 | 0.000493 | 0.000833 |
| AC092723.1  | 0.087885 | 0.032532 | -1.43376 | 1.54E-09 | 5.68E-09 |
| AC007608.1  | 0.135015 | 0.064338 | -1.06937 | 2.69E-17 | 3.01E-16 |
| LINC02512   | 0.35324  | 0.105319 | -1.74589 | 3.41E-14 | 2.43E-13 |
| AC092535.3  | 0.068672 | 0.449379 | 2.710146 | 0.005034 | 0.007263 |
| KRTAP5-AS1  | 0.287086 | 0.580933 | 1.016888 | 0.003199 | 0.004764 |
| LINC01975   | 0.061535 | 0.023175 | -1.40882 | 8.08E-10 | 3.10E-09 |
| AC010776.2  | 1.131822 | 0.176526 | -2.6807  | 5.18E-28 | 3.58E-26 |
| AC027348.1  | 0.208874 | 0.097869 | -1.09372 | 1.97E-09 | 7.12E-09 |
| AC005383.1  | 0.141281 | 0.289307 | 1.034036 | 0.026651 | 0.034304 |
| AC233976.1  | 0.208415 | 0.098839 | -1.07631 | 7.05E-11 | 3.16E-10 |

|              |          |          |          |          |          |
|--------------|----------|----------|----------|----------|----------|
| GTF3C2-AS1   | 0.056424 | 0.168303 | 1.576688 | 2.38E-11 | 1.16E-10 |
| AL008726.1   | 0.103639 | 0.295854 | 1.513312 | 5.27E-11 | 2.41E-10 |
| AC010285.1   | 0.025995 | 0.140905 | 2.438417 | 3.35E-08 | 1.04E-07 |
| AC124067.2   | 0.298331 | 0.859826 | 1.527129 | 0.014264 | 0.01917  |
| AL355338.1   | 1.833177 | 6.544702 | 1.835981 | 3.23E-24 | 9.94E-23 |
| AC096677.1   | 0.994871 | 2.443515 | 1.296376 | 2.44E-19 | 3.62E-18 |
| AP006621.1   | 0.07382  | 0.177597 | 1.266533 | 0.001876 | 0.002905 |
| TCL6         | 0.013705 | 0.050347 | 1.87721  | 0.00951  | 0.013139 |
| AC011442.1   | 0.240856 | 0.640609 | 1.411271 | 2.16E-06 | 5.15E-06 |
| MED4-AS1     | 1.219727 | 0.292358 | -2.06075 | 1.50E-24 | 4.86E-23 |
| AC007848.1   | 0.01764  | 0.246199 | 3.802925 | 0.00018  | 0.000322 |
| AC124016.1   | 0.196955 | 0.432952 | 1.136339 | 2.43E-11 | 1.18E-10 |
| MIR9-3HG     | 0.090452 | 0.644579 | 2.833128 | 1.90E-06 | 4.60E-06 |
| AL031768.1   | 0.129906 | 0.504843 | 1.958368 | 1.45E-14 | 1.08E-13 |
| AL359881.1   | 0.332785 | 1.17576  | 1.820932 | 0.000225 | 0.000398 |
| LINC00862    | 0.028148 | 0.474938 | 4.076648 | 4.57E-22 | 9.37E-21 |
| HID1-AS1     | 1.292926 | 0.194792 | -2.73063 | 5.23E-30 | 6.02E-28 |
| DKFZP434A062 | 0.020538 | 0.009906 | -1.05197 | 3.94E-07 | 1.04E-06 |
| AC099066.1   | 0.021356 | 0.056191 | 1.395722 | 0.010779 | 0.014748 |
| AC026362.1   | 0.047324 | 0.121686 | 1.362522 | 4.27E-14 | 2.99E-13 |
| LINC01625    | 0.111974 | 0.037746 | -1.56875 | 1.49E-21 | 2.88E-20 |
| AL356966.1   | 0.027924 | 0.061607 | 1.141594 | 0.000304 | 0.000527 |
| AC087294.1   | 0.086771 | 0.333235 | 1.941252 | 2.01E-10 | 8.38E-10 |
| AC018358.1   | 0.029446 | 0.003793 | -2.95655 | 1.23E-30 | 1.92E-28 |
| AL670729.3   | 0.031502 | 0.083417 | 1.404883 | 4.48E-05 | 8.80E-05 |
| AC010980.2   | 0.240384 | 0.705358 | 1.553016 | 7.32E-06 | 1.61E-05 |
| LINC01415    | 0.241904 | 0.092898 | -1.38072 | 8.00E-21 | 1.39E-19 |
| AC084083.1   | 0.041854 | 0.236165 | 2.496354 | 5.34E-09 | 1.83E-08 |
| AC138305.1   | 0.011168 | 0.155518 | 3.799651 | 3.35E-06 | 7.72E-06 |
| AC061975.7   | 0.034045 | 0.116916 | 1.779963 | 6.45E-06 | 1.43E-05 |
| AC073320.1   | 0.014528 | 0.04799  | 1.723923 | 2.05E-08 | 6.55E-08 |
| AL162431.1   | 0.032812 | 0.25628  | 2.965415 | 5.55E-13 | 3.29E-12 |
| HDAC11-AS1   | 0.027949 | 0.089043 | 1.67173  | 3.76E-07 | 9.99E-07 |
| AC067930.3   | 0.097585 | 0.237811 | 1.285076 | 1.99E-05 | 4.10E-05 |
| AC135782.3   | 0.033699 | 0.102645 | 1.606886 | 2.20E-07 | 6.06E-07 |
| AC012640.1   | 0.015161 | 0.108895 | 2.844544 | 8.07E-15 | 6.24E-14 |
| AC137834.2   | 0.009493 | 0.068383 | 2.848709 | 1.07E-09 | 4.01E-09 |
| AC243772.2   | 0.04463  | 0.133832 | 1.584348 | 1.04E-06 | 2.60E-06 |
| AC011825.2   | 0.175462 | 0.526727 | 1.585895 | 6.87E-05 | 0.000131 |
| AC020928.1   | 0.035232 | 0.310912 | 3.141564 | 1.63E-08 | 5.26E-08 |
| AC027796.5   | 0.064243 | 0.202695 | 1.657691 | 1.23E-05 | 2.64E-05 |
| AC144831.1   | 1.794141 | 0.580141 | -1.62882 | 1.81E-22 | 3.97E-21 |
| AC021028.1   | 0.249444 | 0.564862 | 1.17918  | 4.84E-07 | 1.27E-06 |
| AL121658.1   | 0.110478 | 0.291878 | 1.401609 | 5.23E-11 | 2.40E-10 |

|                 |          |          |          |          |          |
|-----------------|----------|----------|----------|----------|----------|
| AC090502.1      | 0.00319  | 0.508427 | 7.316236 | 7.02E-22 | 1.39E-20 |
| AC093159.1      | 0.557924 | 0.192435 | -1.5357  | 5.97E-08 | 1.79E-07 |
| AC024451.4      | 0.128776 | 0.460995 | 1.839882 | 5.56E-08 | 1.67E-07 |
| AL450384.1      | 0.115847 | 0.320112 | 1.466354 | 0.004157 | 0.006078 |
| LUARIS          | 0.006452 | 0.037297 | 2.531293 | 3.00E-10 | 1.22E-09 |
| LINC00589       | 0.045648 | 0.207951 | 2.187621 | 5.10E-07 | 1.33E-06 |
| AP000346.1      | 0.056644 | 0.118192 | 1.06114  | 0.010256 | 0.014081 |
| AC105429.1      | 0.053812 | 0.193924 | 1.849481 | 4.45E-08 | 1.36E-07 |
| AC092755.1      | 0.14368  | 0.451521 | 1.651928 | 0.00026  | 0.000456 |
| AC093249.2      | 0.088265 | 0.405211 | 2.198758 | 3.49E-18 | 4.43E-17 |
| AJ239328.1      | 0.015008 | 0.050128 | 1.739862 | 4.79E-05 | 9.36E-05 |
| AL121820.2      | 0.491001 | 1.514023 | 1.624588 | 3.05E-08 | 9.56E-08 |
| LINC01945       | 0.053061 | 0.005004 | -3.40654 | 3.20E-30 | 4.23E-28 |
| AC005329.3      | 0.027981 | 0.060803 | 1.119694 | 0.004781 | 0.006921 |
| AL022157.1      | 0.184878 | 0.401145 | 1.117551 | 1.97E-09 | 7.14E-09 |
| AC011899.2      | 2.775815 | 0.598294 | -2.21399 | 1.17E-30 | 1.86E-28 |
| AC004908.2      | 0.374647 | 0.913851 | 1.286428 | 1.44E-10 | 6.14E-10 |
| TRPM2-AS        | 0.048435 | 0.600265 | 3.631475 | 5.73E-07 | 1.48E-06 |
| AC007996.1      | 0.565952 | 1.470034 | 1.377098 | 4.84E-11 | 2.23E-10 |
| AC010273.2      | 0.686513 | 1.397331 | 1.025315 | 0.000542 | 0.00091  |
| AC138207.7      | 0.058239 | 0.141397 | 1.279689 | 0.000515 | 0.000868 |
| AC073111.1      | 0.065461 | 0.207277 | 1.662853 | 7.91E-07 | 2.01E-06 |
| LINC00636       | 0.087222 | 0.033448 | -1.38275 | 6.64E-08 | 1.98E-07 |
| AC026368.1      | 0.151964 | 0.983927 | 2.694824 | 5.56E-11 | 2.53E-10 |
| AC073316.2      | 0.041812 | 0.705878 | 4.077426 | 2.07E-09 | 7.43E-09 |
| KDM4A-AS1       | 0.250386 | 0.643144 | 1.360988 | 9.09E-15 | 6.98E-14 |
| AC025040.1      | 0.010088 | 0.070332 | 2.801604 | 0.008158 | 0.011387 |
| AL445224.1      | 0.050285 | 0.010509 | -2.25852 | 7.46E-14 | 5.01E-13 |
| AL512631.1      | 0.059588 | 0.125938 | 1.079608 | 0.003797 | 0.005585 |
| LINC02331       | 0.041607 | 0.320305 | 2.944545 | 1.10E-06 | 2.74E-06 |
| NKILA           | 0.700896 | 1.873408 | 1.418392 | 1.54E-10 | 6.57E-10 |
| LINC01082       | 2.056705 | 0.115522 | -4.15409 | 1.11E-32 | 3.58E-30 |
| GAS5            | 26.33212 | 62.40668 | 1.244877 | 4.34E-13 | 2.62E-12 |
| AC004888.1      | 0.013963 | 0.140431 | 3.330191 | 2.51E-06 | 5.90E-06 |
| AL445686.2      | 0.084901 | 0.182347 | 1.102836 | 0.000181 | 0.000324 |
| AL355601.1      | 0.856559 | 0.407114 | -1.07312 | 0.001878 | 0.002906 |
| OVOL1-AS1       | 0.04408  | 0.107165 | 1.281647 | 0.004247 | 0.006196 |
| LL22NC03-63E9.3 | 0.00168  | 0.027395 | 4.027137 | 6.02E-10 | 2.35E-09 |
| FAM83A-AS1      | 0.032945 | 3.364168 | 6.674065 | 3.95E-31 | 7.22E-29 |
| AC022126.1      | 0.086984 | 0.363476 | 2.063038 | 2.18E-09 | 7.81E-09 |
| LINC01197       | 0.322875 | 0.087388 | -1.88547 | 1.67E-28 | 1.39E-26 |
| AC007038.2      | 0.754055 | 1.526101 | 1.01711  | 1.14E-06 | 2.82E-06 |
| LINC01747       | 0.077647 | 0.032376 | -1.262   | 2.80E-12 | 1.53E-11 |
| AC007128.2      | 0.002188 | 0.339649 | 7.278064 | 2.02E-17 | 2.30E-16 |

|            |          |          |          |          |          |
|------------|----------|----------|----------|----------|----------|
| LINC00467  | 1.528915 | 3.413781 | 1.158862 | 6.19E-20 | 9.87E-19 |
| AL122125.1 | 0.095044 | 0.382423 | 2.008507 | 7.28E-11 | 3.25E-10 |
| LINC02015  | 0.0537   | 0.369667 | 2.783236 | 5.05E-09 | 1.73E-08 |
| AC006116.9 | 0.008916 | 0.034988 | 1.972315 | 0.000274 | 0.000477 |
| AC061975.6 | 0.002388 | 0.406332 | 7.410907 | 4.95E-13 | 2.97E-12 |
| AL049869.3 | 0.323688 | 0.850912 | 1.394407 | 0.008712 | 0.012103 |
| AP001033.2 | 0.507708 | 1.337117 | 1.397055 | 2.12E-09 | 7.61E-09 |
| LINC01814  | 0.056815 | 0.160261 | 1.496092 | 2.57E-09 | 9.14E-09 |
| AC113189.4 | 0.001502 | 0.007073 | 2.235818 | 6.84E-09 | 2.32E-08 |
| AC092691.1 | 1.206331 | 0.168921 | -2.83621 | 3.78E-30 | 4.52E-28 |
| AC004837.2 | 0.160725 | 0.518635 | 1.690126 | 2.02E-08 | 6.47E-08 |
| LINC01587  | 0.028433 | 0.268416 | 3.238826 | 2.94E-09 | 1.03E-08 |
| LMO7DN     | 0.375926 | 0.15274  | -1.29937 | 1.26E-12 | 7.24E-12 |
| LINC02004  | 0.359869 | 0.732301 | 1.024965 | 0.027023 | 0.034754 |
| AC244517.2 | 0.02619  | 0.064257 | 1.294841 | 0.016164 | 0.021491 |
| FAM138B    | 0.031544 | 0.012608 | -1.32304 | 2.28E-08 | 7.26E-08 |
| LINC01691  | 0.029722 | 0.11533  | 1.956182 | 1.64E-05 | 3.42E-05 |
| AC018816.1 | 0.370296 | 1.15691  | 1.643525 | 1.97E-12 | 1.10E-11 |
| LINC02469  | 0.048829 | 0.023069 | -1.0818  | 2.48E-08 | 7.83E-08 |
| AC099684.2 | 0.061087 | 0.142767 | 1.224725 | 0.003265 | 0.004857 |
| SZT2-AS1   | 0.032906 | 0.072679 | 1.143198 | 0.000238 | 0.000419 |
| AC093278.2 | 4.334245 | 1.256125 | -1.7868  | 2.57E-27 | 1.50E-25 |
| AC096734.1 | 0.011455 | 0.066281 | 2.532552 | 2.95E-09 | 1.03E-08 |
| AC013652.1 | 0.059689 | 0.389094 | 2.704571 | 1.33E-10 | 5.73E-10 |
| HLCS-IT1   | 0.043746 | 0.183229 | 2.066422 | 0.001577 | 0.002462 |
| AC005180.2 | 0.68975  | 0.200287 | -1.784   | 1.35E-18 | 1.82E-17 |
| AC134775.1 | 0.090705 | 0.235931 | 1.379103 | 0.001136 | 0.001815 |
| AC007405.2 | 0.007251 | 0.080534 | 3.473292 | 2.87E-09 | 1.01E-08 |
| AC233280.1 | 0.017811 | 0.108263 | 2.603707 | 3.84E-18 | 4.87E-17 |
| LINC02585  | 0.383732 | 0.991008 | 1.3688   | 9.00E-14 | 5.95E-13 |
| AC092718.4 | 2.343545 | 5.099391 | 1.121633 | 6.84E-15 | 5.41E-14 |
| AC084880.3 | 0.378482 | 0.091215 | -2.05289 | 4.45E-18 | 5.58E-17 |
| AC009159.2 | 0.034573 | 0.109191 | 1.659122 | 0.006385 | 0.009075 |
| AC011933.3 | 0.091163 | 0.258659 | 1.504536 | 0.001885 | 0.002916 |
| AC040934.1 | 0.079715 | 0.243008 | 1.60808  | 1.42E-05 | 3.00E-05 |
| C15orf54   | 0.021713 | 0.176967 | 3.026836 | 2.72E-06 | 6.37E-06 |
| AC245060.2 | 0.223618 | 0.560371 | 1.325349 | 3.62E-09 | 1.26E-08 |
| GPC5-AS1   | 0.592138 | 0.173908 | -1.7676  | 4.73E-13 | 2.84E-12 |
| LINC01355  | 0.406109 | 1.260899 | 1.634514 | 8.67E-13 | 5.07E-12 |
| AC073352.1 | 0.069985 | 0.239544 | 1.775172 | 1.15E-09 | 4.30E-09 |
| AL008628.1 | 0.030775 | 0.009134 | -1.7524  | 2.91E-17 | 3.24E-16 |
| AC008760.2 | 0.622172 | 1.927225 | 1.631139 | 0.026612 | 0.034261 |
| LINC02299  | 0.109818 | 0.017821 | -2.62347 | 3.18E-15 | 2.65E-14 |
| LINC02147  | 0.124196 | 0.043205 | -1.52334 | 6.63E-17 | 7.04E-16 |

|             |          |          |          |          |          |
|-------------|----------|----------|----------|----------|----------|
| AC008434.1  | 0.055758 | 0.187925 | 1.752908 | 1.70E-09 | 6.23E-09 |
| AC018648.1  | 0.108205 | 0.300284 | 1.472569 | 8.67E-07 | 2.19E-06 |
| PURPL       | 0.014019 | 0.229999 | 4.036219 | 0.001426 | 0.002244 |
| UFL1-AS1    | 0.038938 | 0.101541 | 1.382791 | 0.007931 | 0.011098 |
| AC011815.1  | 0.259073 | 0.603559 | 1.220136 | 6.31E-11 | 2.85E-10 |
| AC138904.1  | 0.036278 | 0.376226 | 3.374435 | 3.48E-22 | 7.35E-21 |
| AP001189.3  | 3.579495 | 0.678061 | -2.40027 | 1.43E-27 | 8.77E-26 |
| AL136982.6  | 0.073202 | 0.025584 | -1.51663 | 8.68E-08 | 2.55E-07 |
| ERI3-IT1    | 0.072351 | 0.321669 | 2.1525   | 0.022984 | 0.0299   |
| AP003064.2  | 1.323382 | 0.265458 | -2.31767 | 3.25E-16 | 3.09E-15 |
| AC104170.1  | 0.139731 | 0.36621  | 1.390017 | 4.66E-06 | 1.05E-05 |
| AL033527.2  | 0.01358  | 0.062089 | 2.19282  | 2.74E-07 | 7.43E-07 |
| AL359378.1  | 0.211465 | 0.02664  | -2.98875 | 1.79E-34 | 1.01E-31 |
| AC124319.1  | 0.422717 | 1.713232 | 2.018957 | 1.13E-08 | 3.75E-08 |
| AL589765.4  | 0.790003 | 2.55358  | 1.692592 | 4.48E-21 | 8.09E-20 |
| AL137802.2  | 0.056872 | 0.132959 | 1.225179 | 0.000205 | 0.000365 |
| AC005091.1  | 0.019737 | 0.061263 | 1.634126 | 2.45E-07 | 6.69E-07 |
| AC022165.1  | 0.023093 | 0.148229 | 2.682305 | 2.49E-10 | 1.03E-09 |
| AC008105.1  | 0.224156 | 0.469087 | 1.065354 | 4.99E-06 | 1.12E-05 |
| LINC01890   | 0.018669 | 0.007789 | -1.26119 | 2.91E-06 | 6.78E-06 |
| KCNMB2-AS1  | 0.026735 | 1.39743  | 5.7079   | 1.07E-13 | 7.00E-13 |
| AC004988.1  | 0.863236 | 0.314966 | -1.45456 | 7.20E-18 | 8.82E-17 |
| MGC27382    | 1.304557 | 0.192201 | -2.76287 | 2.04E-28 | 1.65E-26 |
| AC116025.2  | 0.021662 | 0.243294 | 3.48943  | 3.80E-15 | 3.11E-14 |
| VPS9D1-AS1  | 0.425291 | 3.235547 | 2.927486 | 4.44E-25 | 1.60E-23 |
| ADAMTS9-AS2 | 0.425882 | 0.187319 | -1.18496 | 2.73E-23 | 6.77E-22 |
| SCAANT1     | 0.236698 | 0.567965 | 1.262756 | 5.54E-06 | 1.24E-05 |
| AC078909.2  | 0.054897 | 0.218609 | 1.993546 | 3.33E-10 | 1.34E-09 |
| GACAT2      | 0.011804 | 0.069431 | 2.556312 | 0.002088 | 0.003202 |
| AC090164.2  | 0.021396 | 0.138304 | 2.692448 | 0.000298 | 0.000517 |
| AP002954.1  | 1.932686 | 0.849003 | -1.18676 | 1.93E-15 | 1.65E-14 |
| DPP10-AS1   | 0.155096 | 1.833972 | 3.563734 | 0.000256 | 0.000448 |
| AC011352.3  | 0.002755 | 0.206967 | 6.231438 | 8.68E-17 | 9.03E-16 |
| EWSAT1      | 0.028841 | 0.081365 | 1.496275 | 0.007994 | 0.011183 |
| AC010719.1  | 0.215032 | 1.661123 | 2.949533 | 2.85E-19 | 4.21E-18 |
| AP003555.3  | 0.513404 | 0.175245 | -1.55072 | 3.07E-16 | 2.92E-15 |
| LINC00092   | 0.922654 | 0.272426 | -1.75993 | 2.41E-25 | 9.36E-24 |
| IFNG-AS1    | 0.082003 | 0.3153   | 1.942984 | 1.86E-07 | 5.17E-07 |
| AC019294.2  | 0.01664  | 0.046367 | 1.478421 | 7.17E-11 | 3.21E-10 |
| AC018695.3  | 0.027506 | 0.080329 | 1.54618  | 0.002018 | 0.003104 |
| AC008063.1  | 0.169227 | 0.910726 | 2.428058 | 7.19E-06 | 1.58E-05 |
| LINC01926   | 0.009229 | 0.179557 | 4.282159 | 1.43E-14 | 1.07E-13 |
| AL450332.1  | 0.054152 | 0.022365 | -1.27578 | 1.49E-08 | 4.85E-08 |
| RMDN2-AS1   | 0.02836  | 0.202342 | 2.834879 | 9.20E-16 | 8.16E-15 |

|             |          |          |          |          |          |
|-------------|----------|----------|----------|----------|----------|
| AC098936.1  | 0.006356 | 0.034645 | 2.446529 | 1.31E-09 | 4.85E-09 |
| FP325332.1  | 0.035247 | 0.091441 | 1.375352 | 0.008987 | 0.012464 |
| AP001363.2  | 0.549225 | 0.210165 | -1.38588 | 3.28E-18 | 4.17E-17 |
| AL035252.2  | 0.006949 | 0.087396 | 3.652637 | 2.36E-07 | 6.48E-07 |
| AC103724.4  | 0.385543 | 0.178429 | -1.11154 | 1.69E-11 | 8.38E-11 |
| AC005237.1  | 0.118736 | 0.404074 | 1.766866 | 0.006585 | 0.009334 |
| AC234781.1  | 0.010562 | 0.040593 | 1.942345 | 3.73E-07 | 9.91E-07 |
| AC009065.1  | 0.010032 | 0.025541 | 1.348273 | 0.003612 | 0.005335 |
| LOXL1-AS1   | 0.484037 | 1.285467 | 1.409102 | 2.58E-18 | 3.33E-17 |
| LINC01268   | 0.64766  | 0.291446 | -1.15201 | 4.72E-16 | 4.33E-15 |
| AC015849.1  | 0.044934 | 0.113329 | 1.334622 | 0.000891 | 0.001446 |
| AL360004.1  | 0.009659 | 0.028439 | 1.557975 | 0.000659 | 0.00109  |
| AC010624.1  | 0.413426 | 0.121132 | -1.77104 | 7.53E-11 | 3.36E-10 |
| LINC01786   | 0.318161 | 0.875346 | 1.460098 | 3.05E-08 | 9.56E-08 |
| HHATL-AS1   | 0.308511 | 0.076878 | -2.00468 | 9.95E-13 | 5.75E-12 |
| BASP1-AS1   | 0.014827 | 0.06053  | 2.029414 | 0.004268 | 0.006223 |
| AC091588.2  | 0.07644  | 0.019869 | -1.94379 | 2.86E-09 | 1.01E-08 |
| AC063944.3  | 0.143361 | 0.063344 | -1.17838 | 2.70E-07 | 7.32E-07 |
| AC084864.1  | 0.032884 | 0.503739 | 3.937207 | 5.87E-25 | 2.05E-23 |
| AC022007.1  | 0.631935 | 1.3026   | 1.043546 | 5.33E-14 | 3.68E-13 |
| FAM167A-AS1 | 0.142745 | 0.049466 | -1.52894 | 2.91E-22 | 6.23E-21 |
| AC110769.2  | 0.049172 | 0.190303 | 1.952383 | 3.04E-12 | 1.65E-11 |
| AC068987.1  | 0.13173  | 0.471021 | 1.838207 | 0.000446 | 0.000757 |
| AC099791.2  | 0.055633 | 0.125243 | 1.170727 | 0.000338 | 0.000583 |
| AL512283.1  | 0.006378 | 0.065638 | 3.363273 | 1.51E-05 | 3.16E-05 |
| LIVAR       | 0.044239 | 0.196088 | 2.148096 | 0.002539 | 0.003842 |
| MIR137HG    | 0.001356 | 0.076191 | 5.812376 | 2.07E-09 | 7.44E-09 |
| AC019193.2  | 0.65211  | 0.134299 | -2.27966 | 6.11E-24 | 1.74E-22 |
| AC083809.1  | 0.164243 | 5.413098 | 5.042549 | 0.000439 | 0.000746 |
| AC010186.1  | 0.007795 | 0.058532 | 2.908554 | 5.24E-07 | 1.36E-06 |
| AC007277.1  | 0.247033 | 0.080411 | -1.61924 | 7.55E-18 | 9.24E-17 |
| UBE2Q1-AS1  | 0.158934 | 0.638783 | 2.006897 | 2.29E-15 | 1.94E-14 |
| AL645924.1  | 1.981918 | 0.840393 | -1.23776 | 0.000253 | 0.000443 |
| AL391095.1  | 0.087046 | 0.200108 | 1.200933 | 2.91E-05 | 5.83E-05 |
| AL360270.2  | 0.042685 | 0.135123 | 1.662471 | 8.01E-07 | 2.03E-06 |
| AC105118.1  | 0.040444 | 1.049017 | 4.696961 | 9.95E-13 | 5.75E-12 |
| AC079305.3  | 0.132257 | 0.063503 | -1.05846 | 0.001625 | 0.002533 |
| AC016396.1  | 0.04408  | 0.093953 | 1.0918   | 0.000825 | 0.001348 |
| CSE1L-AS1   | 0.027352 | 0.094754 | 1.792545 | 1.48E-07 | 4.18E-07 |
| AC008609.1  | 0.186203 | 0.064957 | -1.51931 | 0.00012  | 0.000222 |
| AC068228.1  | 0.00539  | 0.417197 | 6.274356 | 3.20E-27 | 1.82E-25 |
| LINC01168   | 0.03365  | 0.006451 | -2.38304 | 5.34E-14 | 3.68E-13 |
| TBX2-AS1    | 3.403922 | 0.887698 | -1.93906 | 4.29E-27 | 2.36E-25 |
| AL356608.1  | 0.079743 | 0.037412 | -1.09185 | 3.22E-06 | 7.44E-06 |



|             |          |          |          |          |          |
|-------------|----------|----------|----------|----------|----------|
| AC005726.2  | 0.023367 | 0.139926 | 2.5821   | 1.04E-10 | 4.57E-10 |
| AC103702.2  | 0.038317 | 0.888387 | 4.535149 | 3.21E-09 | 1.12E-08 |
| DANCR       | 5.953401 | 12.08299 | 1.021191 | 4.93E-15 | 3.98E-14 |
| AC005180.1  | 0.412432 | 0.141324 | -1.54515 | 8.29E-17 | 8.67E-16 |
| AC108751.4  | 0.056245 | 0.210807 | 1.906139 | 4.01E-08 | 1.23E-07 |
| LINC02195   | 0.34065  | 1.353275 | 1.990094 | 8.98E-09 | 2.99E-08 |
| LINC01979   | 0.010346 | 0.061738 | 2.577124 | 1.54E-13 | 9.87E-13 |
| AC026412.3  | 0.191094 | 0.635627 | 1.733896 | 4.34E-12 | 2.33E-11 |
| U62317.1    | 0.870825 | 6.917477 | 2.989792 | 8.00E-27 | 4.11E-25 |
| AL356055.1  | 0.041374 | 0.406469 | 3.296355 | 2.26E-05 | 4.62E-05 |
| AC019193.3  | 0.087658 | 0.032456 | -1.43337 | 8.81E-10 | 3.35E-09 |
| LINC01204   | 0.003446 | 0.021365 | 2.632087 | 0.002582 | 0.003901 |
| LINC01876   | 0.143151 | 0.815821 | 2.510715 | 7.49E-08 | 2.22E-07 |
| AC245884.10 | 0.065944 | 0.250315 | 1.92444  | 0.000157 | 0.000283 |
| AC012447.1  | 0.078948 | 0.269518 | 1.771402 | 4.43E-07 | 1.17E-06 |
| AC025580.2  | 0.174431 | 0.498552 | 1.515085 | 1.71E-12 | 9.65E-12 |
| AL035530.1  | 0.63499  | 0.262699 | -1.27332 | 3.03E-11 | 1.45E-10 |
| AC013480.1  | 0.150918 | 0.046728 | -1.69142 | 1.67E-13 | 1.06E-12 |
| MIR194-2HG  | 0.011577 | 0.062547 | 2.43371  | 0.000522 | 0.000878 |
| AC026495.1  | 0.020677 | 0.055698 | 1.429608 | 0.00404  | 0.005922 |
| AC011676.2  | 0.025043 | 0.110978 | 2.147814 | 0.009067 | 0.012569 |
| AC073323.1  | 0.013639 | 0.133322 | 3.28915  | 2.55E-06 | 5.99E-06 |
| LINC00924   | 0.368154 | 0.164544 | -1.16184 | 2.90E-15 | 2.42E-14 |
| LINC00028   | 0.107843 | 0.044003 | -1.29327 | 1.07E-07 | 3.08E-07 |
| AL451070.1  | 0.043403 | 0.165665 | 1.932395 | 0.009932 | 0.013673 |
| AC084855.1  | 0.119109 | 0.049589 | -1.26419 | 3.21E-11 | 1.52E-10 |
| AL731563.3  | 0.143733 | 0.310903 | 1.113077 | 3.53E-10 | 1.42E-09 |
| AL021707.2  | 0.228376 | 0.694612 | 1.604798 | 1.70E-16 | 1.68E-15 |
| AC002059.1  | 0.18656  | 0.426303 | 1.19224  | 5.88E-05 | 0.000114 |
| AC092720.1  | 0.057384 | 0.129979 | 1.179554 | 1.97E-07 | 5.43E-07 |
| LINC02185   | 1.651269 | 0.490157 | -1.75226 | 6.65E-23 | 1.58E-21 |
| LINC02343   | 0.00767  | 0.075261 | 3.294666 | 9.14E-08 | 2.67E-07 |
| AC069277.1  | 0.004102 | 0.110482 | 4.751214 | 1.23E-06 | 3.03E-06 |
| AL137060.1  | 0.04698  | 0.149684 | 1.671796 | 2.37E-16 | 2.29E-15 |
| WASIR2      | 0.042712 | 0.577077 | 3.756043 | 4.07E-24 | 1.23E-22 |
| AL359504.2  | 0.091307 | 0.32711  | 1.840978 | 4.81E-09 | 1.66E-08 |
| AC010789.1  | 0.011539 | 0.906158 | 6.295227 | 1.85E-10 | 7.76E-10 |
| DSCR9       | 0.032875 | 0.089126 | 1.438836 | 1.04E-10 | 4.56E-10 |
| ZFPM2-AS1   | 0.042389 | 1.88721  | 5.476436 | 5.17E-23 | 1.24E-21 |
| AC106037.2  | 0.106678 | 0.271539 | 1.347892 | 0.007131 | 0.010056 |
| AC107926.1  | 0.021242 | 0.100317 | 2.239567 | 1.06E-05 | 2.29E-05 |
| AC093895.1  | 0.029298 | 0.403016 | 3.781945 | 3.92E-17 | 4.31E-16 |
| AC130371.1  | 0.028483 | 0.159102 | 2.481792 | 0.000229 | 0.000405 |
| CADM3-AS1   | 0.42499  | 0.108248 | -1.97309 | 1.18E-19 | 1.80E-18 |

|            |          |          |          |          |          |
|------------|----------|----------|----------|----------|----------|
| AC090260.1 | 0.028609 | 0.075493 | 1.399856 | 3.91E-08 | 1.20E-07 |
| AL031667.3 | 0.169414 | 0.556641 | 1.716194 | 1.05E-10 | 4.60E-10 |
| LINC02243  | 0.045774 | 0.020122 | -1.18578 | 4.71E-11 | 2.18E-10 |
| AC087276.2 | 0.095757 | 0.231758 | 1.275174 | 0.001541 | 0.002409 |
| AC090527.3 | 0.076601 | 0.199497 | 1.380939 | 6.53E-07 | 1.67E-06 |
| AC078778.2 | 0.092319 | 0.32702  | 1.824682 | 1.02E-06 | 2.55E-06 |
| AC025265.1 | 0.097658 | 0.351926 | 1.849468 | 4.30E-14 | 3.00E-13 |
| AL392046.1 | 0.016486 | 0.053072 | 1.686667 | 5.89E-05 | 0.000114 |
| BX324167.1 | 0.023627 | 0.119213 | 2.335017 | 0.009177 | 0.01271  |
| OGFRP1     | 0.154692 | 0.500079 | 1.692762 | 4.70E-25 | 1.68E-23 |
| AL161756.1 | 0.029938 | 0.093396 | 1.641356 | 8.55E-14 | 5.67E-13 |
| LINC01800  | 0.023799 | 0.049013 | 1.042244 | 4.05E-05 | 7.98E-05 |
| AL022069.1 | 0.035563 | 0.085628 | 1.26771  | 8.32E-07 | 2.11E-06 |
| ZBTB20-AS1 | 0.022879 | 0.259769 | 3.505118 | 3.97E-06 | 9.07E-06 |
| AL353152.1 | 0.446821 | 0.11303  | -1.98299 | 1.22E-24 | 4.05E-23 |
| AC084026.2 | 0.035539 | 0.254852 | 2.842205 | 8.62E-07 | 2.18E-06 |
| AC006042.1 | 1.399674 | 4.051588 | 1.533396 | 1.01E-11 | 5.17E-11 |
| CBR3-AS1   | 0.446056 | 0.915969 | 1.038073 | 4.90E-09 | 1.69E-08 |
| AC009185.1 | 0.021928 | 0.044035 | 1.005873 | 0.003045 | 0.004553 |
| LINC01771  | 0.044614 | 0.169103 | 1.922342 | 4.36E-10 | 1.73E-09 |
| AL645608.6 | 0.028067 | 0.378149 | 3.752022 | 3.62E-15 | 2.98E-14 |
| AC008243.1 | 0.049488 | 0.23736  | 2.261917 | 0.006855 | 0.009681 |
| AC006946.2 | 0.037072 | 0.271548 | 2.872819 | 1.19E-07 | 3.40E-07 |
| LINC00517  | 0.004404 | 0.032163 | 2.868595 | 0.025551 | 0.03299  |
| LINC02433  | 0.005057 | 0.086602 | 4.097916 | 1.60E-05 | 3.35E-05 |
| AC090517.2 | 0.339611 | 0.749588 | 1.142215 | 6.65E-08 | 1.98E-07 |
| AC010491.1 | 0.054295 | 0.192005 | 1.82226  | 3.58E-14 | 2.54E-13 |
| LINC00632  | 0.044184 | 0.130244 | 1.559625 | 0.001503 | 0.002353 |
| Z84485.1   | 0.133058 | 0.696749 | 2.388585 | 1.33E-21 | 2.58E-20 |
| AL592114.3 | 0.283103 | 0.13404  | -1.07866 | 1.63E-10 | 6.90E-10 |
| AL022318.1 | 0.022707 | 0.115441 | 2.345935 | 0.004644 | 0.006738 |
| UBXN10-AS1 | 0.544905 | 2.024848 | 1.893738 | 1.74E-10 | 7.34E-10 |
| LINC00160  | 0.033002 | 0.544028 | 4.043064 | 5.50E-18 | 6.83E-17 |
| AC145207.8 | 0.30177  | 0.726947 | 1.2684   | 0.000857 | 0.001396 |
| AC012594.1 | 0.000943 | 0.012365 | 3.713604 | 2.45E-06 | 5.75E-06 |
| AC055855.2 | 0.015748 | 0.065199 | 2.049648 | 5.48E-07 | 1.42E-06 |
| AL353764.1 | 0.158473 | 0.325594 | 1.03884  | 0.000195 | 0.000348 |
| LINC01123  | 0.293797 | 0.680611 | 1.212011 | 4.64E-08 | 1.42E-07 |
| AC079907.1 | 0.246534 | 0.537927 | 1.125623 | 3.37E-09 | 1.18E-08 |
| AC245041.1 | 3.895285 | 0.911985 | -2.09465 | 3.49E-22 | 7.36E-21 |
| AC092436.2 | 0.016237 | 0.71877  | 5.468144 | 6.76E-10 | 2.63E-09 |
| AC084125.2 | 0.114173 | 0.458307 | 2.005096 | 8.90E-15 | 6.84E-14 |
| LNCSRLR    | 0.072906 | 0.41192  | 2.498246 | 3.59E-06 | 8.25E-06 |
| C1orf147   | 0.048224 | 0.203163 | 2.074804 | 5.55E-16 | 5.06E-15 |

|            |          |          |          |          |          |
|------------|----------|----------|----------|----------|----------|
| AC073534.1 | 0.249808 | 0.651823 | 1.383659 | 0.001536 | 0.002403 |
| AC245052.4 | 0.109253 | 0.280481 | 1.360233 | 3.23E-15 | 2.67E-14 |
| AC015914.1 | 0.804272 | 0.354465 | -1.18204 | 4.20E-16 | 3.89E-15 |
| AC004156.1 | 0.018134 | 0.062481 | 1.784687 | 2.86E-11 | 1.37E-10 |
| THOC7-AS1  | 0.027511 | 0.168041 | 2.610741 | 0.004276 | 0.006233 |
| AC104135.1 | 0.113158 | 0.242248 | 1.098143 | 0.033524 | 0.042516 |
| FLJ34503   | 0.1882   | 0.042757 | -2.13803 | 1.13E-18 | 1.53E-17 |
| LINC00894  | 0.246068 | 0.555677 | 1.175188 | 5.48E-05 | 0.000106 |
| AC007991.2 | 0.861625 | 2.590702 | 1.588211 | 0.030552 | 0.038994 |
| AC004130.1 | 0.753565 | 1.802313 | 1.258045 | 9.61E-06 | 2.08E-05 |
| AL365181.3 | 0.187848 | 4.208941 | 4.48582  | 2.32E-17 | 2.61E-16 |
| AC118757.1 | 0.023927 | 0.051013 | 1.092209 | 0.011473 | 0.015632 |
| AP001001.1 | 0.115973 | 0.318065 | 1.45553  | 1.82E-08 | 5.86E-08 |
| LINC01556  | 0.1744   | 0.565293 | 1.696596 | 2.60E-06 | 6.11E-06 |
| AC025171.5 | 0.286832 | 0.657026 | 1.195743 | 9.73E-08 | 2.83E-07 |
| AC009229.2 | 0.076651 | 0.210655 | 1.458496 | 0.003677 | 0.005424 |
| AC092675.1 | 0.033826 | 0.225576 | 2.737419 | 5.84E-07 | 1.51E-06 |
| AC130324.2 | 0.024243 | 0.066335 | 1.45217  | 0.002203 | 0.003363 |
| AC008554.1 | 0.018686 | 0.113205 | 2.598875 | 0.000369 | 0.000632 |
| AC027514.1 | 0.013602 | 0.158399 | 3.541648 | 0.003989 | 0.00585  |
| AL110115.1 | 0.065952 | 0.390908 | 2.567333 | 1.09E-06 | 2.72E-06 |
| AL645608.7 | 0.361162 | 0.727503 | 1.010308 | 0.006794 | 0.0096   |
| FSIP2-AS1  | 0.052296 | 0.151009 | 1.529853 | 0.000665 | 0.0011   |
| LINC02596  | 0.081681 | 0.029429 | -1.47278 | 1.73E-07 | 4.82E-07 |
| AL513217.1 | 0.079389 | 0.248621 | 1.64693  | 0.000162 | 0.000291 |
| AL645608.2 | 0.014135 | 0.17428  | 3.624038 | 1.94E-13 | 1.22E-12 |
| AC005821.1 | 0.026762 | 0.067184 | 1.327951 | 0.007662 | 0.010746 |
| AC005041.3 | 0.209647 | 0.892219 | 2.089437 | 4.91E-24 | 1.45E-22 |
| LINC01480  | 0.34007  | 0.729479 | 1.101034 | 2.03E-06 | 4.86E-06 |
| AC026355.1 | 0.370284 | 1.683838 | 2.185048 | 1.25E-06 | 3.08E-06 |
| SMAD9-IT1  | 0.374372 | 0.178901 | -1.06531 | 5.76E-12 | 3.03E-11 |
| ST7-OT4    | 0.0278   | 0.308623 | 3.47271  | 8.43E-06 | 1.84E-05 |
| AC134407.1 | 0.072835 | 0.246126 | 1.756686 | 0.000102 | 0.000191 |
| AC104984.2 | 0.023327 | 0.198086 | 3.086053 | 1.95E-05 | 4.03E-05 |
| AL049836.1 | 0.177689 | 0.786054 | 2.145271 | 3.09E-11 | 1.47E-10 |
| AC104472.1 | 0.022659 | 0.13777  | 2.604138 | 1.43E-10 | 6.14E-10 |
| AC124944.1 | 0.038427 | 0.094995 | 1.30571  | 6.44E-06 | 1.43E-05 |
| AC087239.1 | 0.212063 | 0.521346 | 1.297747 | 8.09E-07 | 2.05E-06 |
| AP001610.1 | 0.084587 | 0.230866 | 1.448551 | 0.000173 | 0.000311 |
| AC105415.1 | 0.021239 | 0.008731 | -1.28243 | 3.09E-06 | 7.16E-06 |
| AC022240.1 | 0.008738 | 0.102868 | 3.557419 | 4.09E-08 | 1.26E-07 |
| SSTR5-AS1  | 0.002405 | 0.117508 | 5.610864 | 4.44E-05 | 8.71E-05 |
| AL512413.1 | 0.193362 | 0.89611  | 2.212375 | 2.06E-13 | 1.30E-12 |
| AL355512.1 | 0.040843 | 0.211977 | 2.375761 | 2.07E-08 | 6.61E-08 |

|             |          |          |          |          |          |
|-------------|----------|----------|----------|----------|----------|
| AL662890.1  | 0.030412 | 0.243531 | 3.001389 | 2.40E-12 | 1.32E-11 |
| AC067930.5  | 0.055796 | 0.286832 | 2.361972 | 1.91E-13 | 1.20E-12 |
| AL354811.1  | 0.066799 | 0.173352 | 1.375805 | 0.000505 | 0.000851 |
| AC007342.4  | 0.294305 | 1.116404 | 1.923477 | 6.88E-16 | 6.20E-15 |
| AP001574.1  | 0.134932 | 1.157694 | 3.100953 | 4.54E-10 | 1.80E-09 |
| U62317.4    | 0.366484 | 2.988135 | 3.027421 | 2.24E-22 | 4.86E-21 |
| AC009962.1  | 0.296578 | 0.113659 | -1.38369 | 2.01E-24 | 6.39E-23 |
| AC120036.4  | 0.088212 | 0.489061 | 2.47096  | 5.11E-15 | 4.11E-14 |
| AP005717.1  | 0.022094 | 0.084075 | 1.928025 | 1.20E-14 | 9.06E-14 |
| AC010205.1  | 0.126436 | 0.041468 | -1.60835 | 1.43E-13 | 9.22E-13 |
| AC226101.1  | 0.160738 | 0.039559 | -2.02263 | 1.74E-20 | 2.90E-19 |
| AP001412.1  | 0.093986 | 0.216447 | 1.203487 | 1.28E-07 | 3.64E-07 |
| RPS6KA2-IT1 | 0.390303 | 0.961023 | 1.299978 | 2.77E-06 | 6.49E-06 |
| AC025871.1  | 0.012197 | 0.06596  | 2.435098 | 9.41E-06 | 2.04E-05 |
| AC131009.2  | 0.007428 | 0.135601 | 4.190268 | 2.85E-10 | 1.16E-09 |
| AL133410.1  | 0.327058 | 0.730955 | 1.160236 | 1.18E-07 | 3.38E-07 |
| AC008731.1  | 0.18717  | 0.380254 | 1.022617 | 0.008426 | 0.011722 |
| AC005062.1  | 0.056893 | 0.258647 | 2.184655 | 1.87E-08 | 6.01E-08 |
| AC114763.1  | 0.157054 | 0.381965 | 1.282184 | 2.70E-14 | 1.96E-13 |
| AC005324.1  | 0.097216 | 0.012394 | -2.97156 | 8.30E-26 | 3.56E-24 |
| AL365436.2  | 0.093814 | 0.33851  | 1.851328 | 6.85E-10 | 2.66E-09 |
| AL031186.1  | 0.482174 | 1.048917 | 1.121274 | 2.47E-08 | 7.79E-08 |
| AC022211.1  | 0.22375  | 1.01338  | 2.179217 | 4.19E-17 | 4.59E-16 |
| ZNF114-AS1  | 0.028623 | 0.178181 | 2.63809  | 1.63E-05 | 3.40E-05 |
| CLEC12A-AS1 | 0.006935 | 0.027984 | 2.012669 | 9.18E-05 | 0.000172 |
| MNX1-AS2    | 0.124523 | 1.100998 | 3.14433  | 3.28E-14 | 2.34E-13 |
| AL031599.1  | 0.18309  | 0.03852  | -2.24888 | 9.31E-24 | 2.55E-22 |
| LINC00106   | 1.397687 | 3.0026   | 1.103172 | 6.21E-05 | 0.00012  |
| AL139246.4  | 0.049493 | 0.125443 | 1.34172  | 0.002532 | 0.003833 |
| ITGB2-AS1   | 0.727936 | 2.520028 | 1.791556 | 1.76E-09 | 6.41E-09 |
| AP000438.1  | 0.557556 | 0.074155 | -2.91049 | 1.12E-28 | 9.96E-27 |
| AC004264.1  | 0.191211 | 0.812486 | 2.087175 | 5.40E-10 | 2.12E-09 |
| LINC01341   | 0.119935 | 0.298012 | 1.313114 | 9.87E-05 | 0.000184 |
| AC020913.3  | 0.312274 | 0.848696 | 1.442433 | 0.013852 | 0.018652 |
| AC006033.2  | 0.756821 | 0.333225 | -1.18345 | 1.15E-19 | 1.77E-18 |
| LINC00365   | 0.326844 | 0.136075 | -1.2642  | 1.06E-16 | 1.08E-15 |
| AC074138.1  | 0.150652 | 0.353865 | 1.231974 | 7.28E-05 | 0.000139 |
| HOXD-AS2    | 0.063293 | 0.26032  | 2.040166 | 2.68E-05 | 5.41E-05 |
| PRRT3-AS1   | 0.645466 | 2.374874 | 1.879438 | 6.75E-19 | 9.51E-18 |
| AC106820.4  | 0.0866   | 0.219266 | 1.340246 | 0.010224 | 0.014043 |
| LINC00702   | 0.85289  | 0.196636 | -2.11684 | 6.92E-27 | 3.61E-25 |
| AC011625.1  | 0.115714 | 0.0392   | -1.56164 | 1.88E-12 | 1.05E-11 |
| AP005328.1  | 0.006258 | 0.118802 | 4.246676 | 3.28E-06 | 7.57E-06 |
| TMC3-AS1    | 0.163003 | 0.350604 | 1.104947 | 6.09E-10 | 2.38E-09 |

|            |          |          |          |          |          |
|------------|----------|----------|----------|----------|----------|
| JMJD1C-AS1 | 0.42719  | 1.201818 | 1.492267 | 2.05E-06 | 4.92E-06 |
| AL121832.1 | 0.029359 | 0.095079 | 1.695339 | 2.53E-05 | 5.13E-05 |
| AL354861.3 | 0.085938 | 0.018818 | -2.19119 | 1.78E-25 | 7.22E-24 |
| AC092171.1 | 0.08882  | 0.294679 | 1.730189 | 5.09E-05 | 9.91E-05 |
| AC126696.3 | 0.007346 | 0.083252 | 3.50248  | 1.36E-11 | 6.81E-11 |
| LINC01811  | 0.132424 | 0.04214  | -1.6519  | 5.84E-14 | 4.00E-13 |
| Z69733.1   | 1.065803 | 0.339055 | -1.65235 | 9.55E-21 | 1.64E-19 |
| AC012409.3 | 0.237926 | 0.118005 | -1.01166 | 4.12E-14 | 2.89E-13 |
| LINC02363  | 0.073866 | 0.158224 | 1.098997 | 2.46E-09 | 8.76E-09 |
| LINC02362  | 0.155284 | 1.074704 | 2.790961 | 9.24E-19 | 1.28E-17 |
| BX539320.1 | 0.702256 | 1.474796 | 1.070447 | 9.06E-05 | 0.00017  |
| AC020634.1 | 0.370695 | 0.178274 | -1.05614 | 1.86E-13 | 1.17E-12 |
| AC092112.1 | 0.052448 | 0.200902 | 1.937519 | 0.000306 | 0.00053  |
| AC112721.1 | 0.028183 | 0.228209 | 3.017467 | 9.91E-14 | 6.51E-13 |
| AC012676.4 | 0.085602 | 0.184244 | 1.105908 | 8.04E-05 | 0.000152 |
| FLJ16779   | 0.011875 | 0.087219 | 2.87675  | 1.29E-05 | 2.75E-05 |
| AL035458.2 | 0.070378 | 0.247171 | 1.812323 | 9.64E-09 | 3.20E-08 |
| AC116914.1 | 0.09075  | 0.210263 | 1.212233 | 0.00109  | 0.001749 |
| AC087045.2 | 0.031811 | 0.162647 | 2.354163 | 1.87E-12 | 1.05E-11 |
| AC127024.5 | 1.123101 | 2.507889 | 1.158986 | 1.88E-11 | 9.22E-11 |
| AL360270.1 | 0.198693 | 0.461176 | 1.214777 | 7.60E-12 | 3.95E-11 |
| AC092969.1 | 0.015903 | 0.29783  | 4.227164 | 4.89E-08 | 1.49E-07 |
| AC010255.1 | 0.530586 | 0.132403 | -2.00265 | 5.00E-12 | 2.65E-11 |
| AC134312.4 | 0.085815 | 0.025886 | -1.72906 | 2.64E-08 | 8.30E-08 |
| CASC9      | 0.056345 | 2.727965 | 5.59739  | 3.21E-09 | 1.12E-08 |
| AC100861.1 | 0.471118 | 1.403032 | 1.574388 | 1.77E-27 | 1.07E-25 |
| AC087289.5 | 0.134374 | 0.348501 | 1.374905 | 2.82E-14 | 2.04E-13 |
| LNCAROD    | 0.004595 | 0.369679 | 6.329996 | 2.03E-10 | 8.45E-10 |
| AC105206.1 | 0.282988 | 0.084427 | -1.74497 | 2.42E-24 | 7.55E-23 |
| AL355388.1 | 2.456694 | 0.77351  | -1.66723 | 4.47E-16 | 4.13E-15 |
| AL022068.1 | 0.696335 | 0.312568 | -1.15561 | 5.26E-11 | 2.41E-10 |
| AC073314.1 | 0.024057 | 0.05664  | 1.235348 | 1.33E-06 | 3.27E-06 |
| AC245884.9 | 0.032202 | 0.076613 | 1.250452 | 0.010876 | 0.014868 |
| AC026780.2 | 0.075411 | 0.016161 | -2.22229 | 4.63E-18 | 5.79E-17 |
| LINC02395  | 0.002495 | 0.009097 | 1.866565 | 0.002436 | 0.003697 |
| AC105339.3 | 0.084265 | 0.231842 | 1.460133 | 5.08E-05 | 9.90E-05 |
| AC245100.6 | 0.002814 | 0.031819 | 3.499124 | 6.04E-10 | 2.36E-09 |
| AL359313.1 | 0.002721 | 0.043449 | 3.996871 | 2.73E-07 | 7.39E-07 |
| AL049555.1 | 0.137584 | 1.395658 | 3.342559 | 1.91E-05 | 3.96E-05 |
| AC092119.2 | 0.247906 | 0.804943 | 1.699094 | 1.01E-13 | 6.61E-13 |
| AC006262.1 | 0.013584 | 0.08714  | 2.681451 | 8.46E-11 | 3.75E-10 |
| AL118505.1 | 0.083232 | 0.355197 | 2.093415 | 8.48E-16 | 7.57E-15 |
| AL512288.1 | 0.060168 | 0.139602 | 1.214239 | 0.001242 | 0.001977 |
| LINC00630  | 0.33074  | 0.684354 | 1.049046 | 1.17E-15 | 1.02E-14 |

|            |          |          |          |          |          |
|------------|----------|----------|----------|----------|----------|
| LINC01943  | 0.340074 | 0.759076 | 1.158393 | 1.31E-09 | 4.85E-09 |
| AC015813.4 | 0.052298 | 0.26768  | 2.355694 | 2.50E-07 | 6.81E-07 |
| AC127496.2 | 0.185983 | 0.409657 | 1.139248 | 0.034316 | 0.043397 |
| LINC01305  | 0.001052 | 0.068658 | 6.027649 | 9.84E-09 | 3.27E-08 |
| AC009275.1 | 0.096796 | 0.543884 | 2.49028  | 3.46E-10 | 1.39E-09 |
| AC087392.2 | 0.501903 | 0.209951 | -1.25736 | 2.82E-20 | 4.60E-19 |
| SRD5A3-AS1 | 0.22532  | 0.689129 | 1.612802 | 4.36E-12 | 2.33E-11 |
| AP005436.2 | 0.059021 | 0.275073 | 2.220516 | 0.001288 | 0.002043 |
| AC093904.2 | 0.030197 | 0.379775 | 3.652653 | 1.14E-16 | 1.17E-15 |
| AL157931.1 | 0.026127 | 0.376342 | 3.84841  | 3.79E-12 | 2.04E-11 |
| PHKA1-AS1  | 0.011411 | 0.069375 | 2.604026 | 2.79E-06 | 6.51E-06 |
| AL512604.2 | 0.011567 | 0.040563 | 1.810129 | 5.16E-05 | 0.0001   |
| AC022893.1 | 0.500038 | 0.248086 | -1.0112  | 1.53E-18 | 2.04E-17 |
| AC105345.2 | 0.018375 | 0.070115 | 1.931986 | 0.018544 | 0.024457 |
| P4HA2-AS1  | 0.11889  | 0.054722 | -1.11945 | 4.23E-11 | 1.97E-10 |
| AL445465.2 | 0.040323 | 0.140463 | 1.800515 | 0.004733 | 0.006858 |
| AC015909.3 | 0.00442  | 0.022589 | 2.353687 | 0.000422 | 0.000718 |
| NPSR1-AS1  | 0.000536 | 0.06005  | 6.808287 | 2.62E-22 | 5.65E-21 |
| AC012349.1 | 0.081128 | 0.020769 | -1.96575 | 2.22E-25 | 8.79E-24 |
| AC107021.1 | 0.073782 | 0.383284 | 2.377075 | 0.029476 | 0.037707 |
| AL021154.1 | 0.161588 | 0.460289 | 1.510217 | 1.30E-05 | 2.76E-05 |
| AC002398.2 | 0.180786 | 0.036172 | -2.32134 | 3.12E-25 | 1.17E-23 |
| AL357518.1 | 0.127831 | 0.040851 | -1.64581 | 1.27E-12 | 7.25E-12 |
| SEPT4-AS1  | 0.146725 | 0.312267 | 1.089665 | 3.39E-13 | 2.07E-12 |
| LINC01623  | 0.00509  | 0.012188 | 1.259777 | 0.015037 | 0.020109 |
| LINC02289  | 0.566566 | 0.231331 | -1.29228 | 1.21E-20 | 2.05E-19 |
| AC131971.1 | 0.055483 | 0.685665 | 3.627398 | 0.000321 | 0.000555 |
| AC026202.2 | 0.391419 | 0.787987 | 1.009457 | 3.90E-05 | 7.70E-05 |
| LINC01238  | 0.130278 | 0.318439 | 1.289429 | 2.93E-06 | 6.81E-06 |
| AL358473.2 | 0.041151 | 0.008453 | -2.28337 | 1.73E-12 | 9.74E-12 |
| AC007881.3 | 0.075783 | 0.21193  | 1.483652 | 2.80E-07 | 7.58E-07 |
| LUNAR1     | 0.024759 | 0.054208 | 1.130559 | 0.003384 | 0.005023 |
| AL606748.1 | 0.05158  | 0.015627 | -1.72278 | 3.92E-10 | 1.57E-09 |
| LINC00284  | 0.129371 | 0.052761 | -1.29396 | 1.20E-14 | 9.08E-14 |
| AC091153.3 | 0.095386 | 0.388328 | 2.025423 | 1.98E-14 | 1.45E-13 |
| AL021807.1 | 0.310741 | 0.942532 | 1.600829 | 4.88E-05 | 9.54E-05 |
| INTS9-AS1  | 0.043676 | 0.153276 | 1.811213 | 0.002602 | 0.003931 |
| LINC00954  | 0.080111 | 0.259527 | 1.695818 | 3.47E-08 | 1.08E-07 |
| PIC SAR    | 1.347209 | 0.618076 | -1.12412 | 9.25E-20 | 1.45E-18 |
| AC020765.2 | 0.319087 | 0.682894 | 1.097712 | 3.12E-05 | 6.22E-05 |
| AC012617.1 | 0.052493 | 0.114196 | 1.121298 | 0.00395  | 0.005798 |
| AC022211.3 | 0.394957 | 1.558997 | 1.980849 | 6.71E-17 | 7.10E-16 |
| AC093484.2 | 0.026195 | 0.011105 | -1.2381  | 1.11E-10 | 4.87E-10 |
| AC093151.3 | 0.007679 | 0.054871 | 2.837029 | 4.43E-09 | 1.53E-08 |

|              |          |          |          |          |          |
|--------------|----------|----------|----------|----------|----------|
| MIR497HG     | 0.519429 | 0.2139   | -1.27999 | 1.40E-23 | 3.68E-22 |
| HPN-AS1      | 0.136546 | 0.467674 | 1.776113 | 6.36E-11 | 2.87E-10 |
| AC007663.3   | 0.112946 | 0.303009 | 1.423729 | 2.36E-06 | 5.57E-06 |
| AL023803.3   | 0.012577 | 0.078962 | 2.650397 | 1.98E-08 | 6.36E-08 |
| AC004490.1   | 0.173346 | 0.048483 | -1.83809 | 5.17E-22 | 1.04E-20 |
| AL355472.3   | 0.095188 | 0.324462 | 1.769195 | 3.64E-07 | 9.68E-07 |
| AC078852.2   | 0.041965 | 0.222226 | 2.404759 | 0.00522  | 0.00752  |
| AC126773.2   | 0.107354 | 0.344386 | 1.681656 | 8.29E-14 | 5.52E-13 |
| AP001453.2   | 0.210506 | 2.676686 | 3.668515 | 1.70E-31 | 3.53E-29 |
| AL354861.2   | 0.015921 | 0.105746 | 2.731604 | 1.92E-09 | 6.96E-09 |
| AL357054.4   | 1.285339 | 0.430966 | -1.5765  | 2.57E-23 | 6.38E-22 |
| FAM83C-AS1   | 0.0342   | 0.223504 | 2.708214 | 2.73E-15 | 2.30E-14 |
| AC016205.1   | 0.019905 | 0.354742 | 4.155537 | 1.43E-22 | 3.19E-21 |
| AL445307.1   | 0.821938 | 0.080624 | -3.34974 | 4.26E-32 | 1.10E-29 |
| ITGB5-AS1    | 0.026581 | 0.167509 | 2.655752 | 0.003137 | 0.004679 |
| AC004832.4   | 0.087276 | 0.393212 | 2.171641 | 1.51E-05 | 3.17E-05 |
| AC068594.2   | 0.093223 | 0.402669 | 2.110839 | 2.22E-05 | 4.54E-05 |
| BRWD1-AS1    | 0.019701 | 0.097888 | 2.312886 | 1.82E-07 | 5.04E-07 |
| CALML3-AS1   | 0.015971 | 0.201476 | 3.657108 | 7.41E-15 | 5.82E-14 |
| AL355353.1   | 1.068577 | 2.972926 | 1.476193 | 1.51E-15 | 1.31E-14 |
| AL161751.1   | 0.032535 | 0.011538 | -1.49566 | 4.00E-14 | 2.82E-13 |
| AC005037.1   | 0.067174 | 0.141582 | 1.075661 | 2.51E-07 | 6.82E-07 |
| AC007163.1   | 0.012431 | 0.051315 | 2.045432 | 0.000142 | 0.000258 |
| ELF3-AS1     | 0.709821 | 2.605467 | 1.876015 | 1.31E-24 | 4.32E-23 |
| SLC25A25-AS1 | 0.622049 | 1.499658 | 1.269534 | 7.19E-10 | 2.78E-09 |
| AC008870.2   | 0.352037 | 0.913897 | 1.376306 | 9.69E-13 | 5.64E-12 |
| AC109466.1   | 0.010551 | 0.004508 | -1.2268  | 4.30E-17 | 4.69E-16 |
| LINC01748    | 0.016818 | 0.552173 | 5.037022 | 1.85E-07 | 5.15E-07 |
| PTPRG-AS1    | 0.101523 | 0.402578 | 1.987464 | 2.01E-21 | 3.80E-20 |
| AC099560.1   | 0.032561 | 0.130289 | 2.000491 | 0.006894 | 0.009734 |
| LINC01426    | 0.284273 | 1.860514 | 2.71035  | 2.45E-23 | 6.20E-22 |
| SMIM25       | 22.63802 | 4.466012 | -2.34169 | 1.94E-30 | 2.74E-28 |
| LINC02133    | 0.006689 | 0.153642 | 4.521563 | 1.25E-11 | 6.26E-11 |
| AC007552.2   | 0.464346 | 1.625499 | 1.80761  | 0.000291 | 0.000506 |
| AC117834.1   | 0.028362 | 0.165999 | 2.549123 | 0.009826 | 0.013533 |
| AC005329.1   | 0.010801 | 0.035363 | 1.711038 | 3.81E-05 | 7.53E-05 |
| AC027544.2   | 0.062847 | 0.235244 | 1.904252 | 0.002392 | 0.003634 |
| AL132712.1   | 0.583233 | 1.902956 | 1.706098 | 1.46E-21 | 2.82E-20 |
| JARID2-AS1   | 0.116123 | 0.354294 | 1.609294 | 7.17E-05 | 0.000137 |
| LINC00943    | 0.024608 | 0.10422  | 2.082428 | 2.33E-06 | 5.51E-06 |
| KCNK4-TEX40  | 0.020885 | 0.008367 | -1.3197  | 8.28E-08 | 2.43E-07 |
| AC009139.1   | 0.007097 | 0.124268 | 4.130027 | 8.23E-09 | 2.76E-08 |
| AP001189.6   | 0.096008 | 0.029667 | -1.6943  | 1.76E-13 | 1.12E-12 |
| AC078852.1   | 0.05038  | 0.245666 | 2.285771 | 0.009989 | 0.01374  |

|              |          |          |          |          |          |
|--------------|----------|----------|----------|----------|----------|
| TTLL11-IT1   | 0.020322 | 0.234333 | 3.527441 | 2.98E-11 | 1.43E-10 |
| AC023024.1   | 0.120431 | 0.321804 | 1.417974 | 1.80E-10 | 7.55E-10 |
| AC092354.1   | 0.315503 | 0.15326  | -1.04168 | 3.35E-11 | 1.58E-10 |
| FLJ31356     | 0.161848 | 0.432004 | 1.416404 | 1.29E-06 | 3.17E-06 |
| AC010343.3   | 0.007674 | 0.176091 | 4.52028  | 9.88E-10 | 3.73E-09 |
| TXNDC12-AS1  | 0.049352 | 0.214859 | 2.122203 | 0.000173 | 0.000311 |
| MIR646HG     | 0.137785 | 0.400287 | 1.538619 | 6.05E-05 | 0.000117 |
| AC068305.2   | 0.084128 | 0.808867 | 3.265244 | 7.07E-13 | 4.16E-12 |
| AC069542.1   | 0.046817 | 0.397206 | 3.084781 | 0.000669 | 0.001105 |
| AC078942.1   | 0.226478 | 0.076255 | -1.57046 | 4.17E-15 | 3.40E-14 |
| LINC02043    | 0.008702 | 0.057602 | 2.726656 | 1.34E-12 | 7.65E-12 |
| AL139246.1   | 0.043129 | 0.136693 | 1.664226 | 0.001985 | 0.003058 |
| AL589765.6   | 0.070143 | 0.382365 | 2.446585 | 3.48E-15 | 2.88E-14 |
| AC053503.2   | 0.025785 | 0.149689 | 2.537383 | 4.26E-17 | 4.65E-16 |
| AC111149.2   | 0.076152 | 1.906014 | 4.645529 | 7.60E-19 | 1.07E-17 |
| AC008083.1   | 0.03209  | 0.228222 | 2.830239 | 8.22E-12 | 4.24E-11 |
| CASC15       | 0.299738 | 0.863983 | 1.527303 | 0.000711 | 0.001169 |
| AC027117.1   | 1.839378 | 4.711463 | 1.356957 | 0.008419 | 0.011718 |
| SNAP47-AS1   | 0.008034 | 0.056801 | 2.821666 | 9.13E-09 | 3.04E-08 |
| MIR210HG     | 1.473172 | 3.462999 | 1.233096 | 1.36E-11 | 6.79E-11 |
| AC080037.1   | 0.047743 | 2.140241 | 5.486345 | 7.02E-26 | 3.03E-24 |
| AC134312.5   | 0.03668  | 0.245713 | 2.743924 | 2.97E-16 | 2.84E-15 |
| AC019186.1   | 0.15036  | 0.322382 | 1.100353 | 2.34E-06 | 5.52E-06 |
| PTGES2-AS1   | 0.019387 | 0.116036 | 2.581388 | 8.53E-15 | 6.59E-14 |
| GHET1        | 0.093793 | 0.387263 | 2.045766 | 1.55E-24 | 4.98E-23 |
| LINC01060    | 0.012857 | 0.055143 | 2.100668 | 0.001634 | 0.002546 |
| AC067817.2   | 1.472241 | 0.511811 | -1.52433 | 2.96E-18 | 3.79E-17 |
| AL161729.2   | 0.017505 | 0.177277 | 3.340147 | 0.000249 | 0.000436 |
| AL158835.2   | 0.143938 | 0.47966  | 1.736568 | 1.80E-12 | 1.01E-11 |
| LINC00216    | 0.171773 | 0.611601 | 1.832085 | 0.002447 | 0.003712 |
| AP001453.1   | 0.080358 | 0.173795 | 1.112877 | 8.25E-09 | 2.76E-08 |
| AP000777.2   | 0.020457 | 0.049165 | 1.265034 | 0.000112 | 0.000207 |
| AP000525.1   | 0.081661 | 0.382993 | 2.229604 | 2.66E-08 | 8.35E-08 |
| CAPN10-DT    | 0.269115 | 0.716702 | 1.413153 | 6.53E-17 | 6.95E-16 |
| AF015262.1   | 0.002394 | 0.067157 | 4.80979  | 3.23E-10 | 1.30E-09 |
| DUBR         | 1.66908  | 0.785586 | -1.08721 | 1.80E-21 | 3.41E-20 |
| LINC02595    | 0.137109 | 0.527503 | 1.943856 | 0.001808 | 0.002806 |
| TAPT1-AS1    | 0.59687  | 1.205861 | 1.014576 | 3.65E-10 | 1.46E-09 |
| LINC01770    | 1.780861 | 3.949393 | 1.149056 | 2.08E-07 | 5.75E-07 |
| LINC01781    | 0.282997 | 0.719261 | 1.345731 | 1.53E-07 | 4.29E-07 |
| ARHGAP26-AS1 | 0.023984 | 0.210502 | 3.133716 | 0.001018 | 0.001641 |
| AC112719.2   | 0.006996 | 0.044417 | 2.666589 | 0.00029  | 0.000503 |
| AC092954.1   | 0.108143 | 0.043648 | -1.30895 | 4.67E-08 | 1.42E-07 |
| FMR1-AS1     | 0.005628 | 0.023268 | 2.047569 | 6.70E-08 | 1.99E-07 |



|            |          |          |          |          |          |
|------------|----------|----------|----------|----------|----------|
| AC034102.8 | 0.104979 | 0.317541 | 1.596837 | 5.37E-07 | 1.40E-06 |
| AC018682.1 | 0.215353 | 0.547714 | 1.346718 | 0.034199 | 0.043294 |
| AL161725.2 | 0.100243 | 0.223153 | 1.154539 | 0.0002   | 0.000356 |
| AC022613.1 | 0.424128 | 1.281911 | 1.595725 | 9.67E-07 | 2.43E-06 |
| AC108704.1 | 0.071972 | 0.14609  | 1.021353 | 0.002685 | 0.00405  |
| LINC01208  | 0.003737 | 0.131126 | 5.13287  | 2.75E-16 | 2.64E-15 |
| AL136115.1 | 0.110268 | 0.430183 | 1.963931 | 0.003557 | 0.005267 |
| HOXC-AS2   | 0.00728  | 0.31555  | 5.437781 | 1.20E-16 | 1.22E-15 |
| AC113192.2 | 0.115608 | 0.02314  | -2.32079 | 3.02E-12 | 1.64E-11 |
| LINC00857  | 0.385661 | 2.075723 | 2.42821  | 7.20E-28 | 4.71E-26 |
| LINC01825  | 0.014874 | 0.072936 | 2.29383  | 2.84E-05 | 5.71E-05 |
| SNHG15     | 4.027224 | 8.548804 | 1.085937 | 1.89E-13 | 1.19E-12 |
| AP000842.2 | 0.075303 | 0.026262 | -1.51976 | 1.21E-12 | 6.95E-12 |
| AC078960.1 | 0.052288 | 0.295288 | 2.497566 | 9.48E-08 | 2.76E-07 |
| AP005899.1 | 0.412231 | 1.038111 | 1.332436 | 1.05E-05 | 2.27E-05 |
| AC100793.4 | 0.836406 | 0.191162 | -2.12941 | 3.90E-26 | 1.82E-24 |
| AC021087.3 | 0.013876 | 0.192975 | 3.797784 | 1.80E-11 | 8.90E-11 |
| AL445471.1 | 0.037066 | 0.247896 | 2.741569 | 1.67E-14 | 1.24E-13 |
| SOX2-OT    | 0.050326 | 0.100806 | 1.002217 | 0.027107 | 0.034856 |
| AL161669.3 | 0.105828 | 0.274752 | 1.376406 | 0.032744 | 0.04157  |
| GCC2-AS1   | 0.161448 | 0.352988 | 1.128555 | 2.52E-14 | 1.84E-13 |
| AL353593.1 | 0.171857 | 0.348787 | 1.021139 | 1.05E-08 | 3.49E-08 |
| AL139095.4 | 0.073901 | 0.192828 | 1.383646 | 8.47E-05 | 0.00016  |
| LINC01605  | 0.090494 | 0.374279 | 2.048212 | 9.36E-05 | 0.000175 |
| AL772337.2 | 0.304577 | 0.034446 | -3.14438 | 3.54E-30 | 4.41E-28 |
| AC024337.2 | 0.27201  | 0.091222 | -1.5762  | 6.89E-21 | 1.21E-19 |
| AC005330.1 | 0.036824 | 0.202223 | 2.457221 | 5.44E-09 | 1.86E-08 |
| LINC00607  | 0.615802 | 0.263201 | -1.2263  | 1.01E-23 | 2.75E-22 |
| AC034231.1 | 0.567567 | 1.275458 | 1.168154 | 9.35E-10 | 3.55E-09 |
| LINC01852  | 1.376506 | 0.655648 | -1.07002 | 3.90E-25 | 1.42E-23 |
| LINC01569  | 0.541902 | 1.675441 | 1.628438 | 2.17E-20 | 3.59E-19 |
| DLEU7-AS1  | 0.047018 | 0.22681  | 2.270193 | 3.38E-17 | 3.73E-16 |
| AC092687.3 | 0.76079  | 1.885944 | 1.309718 | 4.76E-08 | 1.45E-07 |
| LINC01914  | 1.203838 | 0.391426 | -1.62083 | 6.46E-21 | 1.14E-19 |
| AL121992.3 | 0.0462   | 0.241138 | 2.383906 | 8.11E-12 | 4.19E-11 |
| LINC02076  | 0.010882 | 0.035462 | 1.704306 | 3.27E-06 | 7.54E-06 |
| AL357093.1 | 0.700577 | 0.200296 | -1.80641 | 1.05E-07 | 3.03E-07 |
| AL158151.1 | 0.083507 | 0.211613 | 1.341453 | 0.006452 | 0.009167 |
| AC111152.2 | 0.684203 | 0.196848 | -1.79734 | 1.75E-19 | 2.61E-18 |
| AC021594.1 | 0.008908 | 0.113028 | 3.665379 | 8.34E-10 | 3.19E-09 |
| AL513303.1 | 0.077599 | 0.015472 | -2.32638 | 2.52E-11 | 1.22E-10 |
| AC026904.1 | 0.175618 | 0.069962 | -1.32779 | 7.04E-10 | 2.73E-09 |
| AC013553.3 | 1.019297 | 0.359712 | -1.50266 | 5.78E-22 | 1.16E-20 |
| AC105339.2 | 0.039387 | 0.155065 | 1.977071 | 5.90E-19 | 8.40E-18 |

|            |          |          |          |          |          |
|------------|----------|----------|----------|----------|----------|
| AC124276.1 | 0.019106 | 0.084135 | 2.138702 | 2.74E-10 | 1.12E-09 |
| AC007431.1 | 0.006368 | 0.103276 | 4.019632 | 7.29E-05 | 0.000139 |
| AL358075.2 | 0.242945 | 0.607118 | 1.321346 | 0.000106 | 0.000196 |
| LINC02428  | 0.005888 | 0.188158 | 4.998005 | 4.94E-09 | 1.70E-08 |
| AC084876.1 | 0.129663 | 0.323178 | 1.317559 | 7.43E-08 | 2.20E-07 |
| LINC00466  | 0.000581 | 0.039098 | 6.073482 | 1.99E-11 | 9.73E-11 |
| AC026992.2 | 0.783404 | 0.133363 | -2.55439 | 2.19E-27 | 1.28E-25 |
| BFSP2-AS1  | 0.017214 | 0.091607 | 2.411866 | 2.80E-09 | 9.88E-09 |
| LINC02033  | 0.216879 | 0.098546 | -1.13802 | 3.24E-14 | 2.32E-13 |
| AP001972.1 | 0.722176 | 0.243357 | -1.56928 | 7.15E-20 | 1.13E-18 |
| AF131215.6 | 1.796591 | 0.652361 | -1.46152 | 3.67E-21 | 6.76E-20 |
| AC124861.1 | 0.163007 | 0.056509 | -1.52837 | 4.12E-14 | 2.89E-13 |
| LINC01311  | 0.146309 | 0.46117  | 1.656286 | 1.15E-16 | 1.17E-15 |
| GFOD1-AS1  | 0.126468 | 0.061332 | -1.04407 | 8.60E-17 | 8.95E-16 |
| AC010201.2 | 0.27029  | 0.585871 | 1.116073 | 1.37E-05 | 2.91E-05 |
| AC100821.2 | 0.087548 | 0.306645 | 1.808417 | 7.53E-09 | 2.54E-08 |
| LINC00524  | 0.040262 | 0.518825 | 3.687761 | 9.25E-05 | 0.000173 |
| AP000842.3 | 0.005742 | 0.077138 | 3.747919 | 3.67E-07 | 9.77E-07 |
| CXXC5-AS1  | 0.023534 | 0.054293 | 1.206045 | 0.021598 | 0.028233 |
| LINC00412  | 0.079782 | 0.2435   | 1.609778 | 0.001473 | 0.00231  |
| AL121956.1 | 0.011568 | 0.098487 | 3.089801 | 0.005286 | 0.007613 |
| AC011498.3 | 0.013519 | 0.06464  | 2.257478 | 6.66E-08 | 1.98E-07 |
| LINC02026  | 0.125121 | 0.255059 | 1.02751  | 2.17E-06 | 5.16E-06 |
| TEX41      | 0.028795 | 0.104424 | 1.858554 | 0.009331 | 0.012912 |
| AC068831.6 | 0.036724 | 0.087426 | 1.251315 | 0.000794 | 0.001298 |
| AC083900.1 | 0.288642 | 0.644662 | 1.159261 | 0.008714 | 0.012103 |
| AL032821.1 | 0.093105 | 0.044053 | -1.07963 | 9.87E-05 | 0.000184 |
| AP000915.1 | 0.10236  | 0.031501 | -1.7002  | 8.38E-14 | 5.56E-13 |
| PKP4-AS1   | 0.045421 | 0.290026 | 2.674742 | 2.12E-13 | 1.33E-12 |
| AL031710.2 | 0.046007 | 0.270915 | 2.55792  | 2.72E-14 | 1.97E-13 |
| AP001178.1 | 0.022999 | 0.126909 | 2.464132 | 3.88E-06 | 8.89E-06 |
| LINC00443  | 0.185129 | 0.068137 | -1.44202 | 9.59E-16 | 8.44E-15 |
| AL590644.1 | 0.001897 | 0.084587 | 5.47828  | 1.92E-12 | 1.07E-11 |
| AL121990.1 | 0.017226 | 0.048474 | 1.492618 | 0.00087  | 0.001417 |
| AC018695.6 | 0.088231 | 0.309885 | 1.812377 | 3.69E-05 | 7.31E-05 |
| SLC2A1-AS1 | 0.051579 | 0.302679 | 2.552945 | 2.05E-24 | 6.48E-23 |
| AL358334.2 | 0.005789 | 0.020861 | 1.849381 | 0.000113 | 0.000209 |
| AC104461.1 | 0.140477 | 1.159962 | 3.045672 | 5.89E-09 | 2.01E-08 |
| AL121790.2 | 2.337108 | 0.910687 | -1.3597  | 8.41E-07 | 2.13E-06 |
| AC239799.2 | 0.014127 | 0.032133 | 1.18564  | 0.000424 | 0.000721 |
| AC063948.1 | 0.259865 | 0.855081 | 1.718296 | 8.85E-14 | 5.86E-13 |
| AP000424.1 | 0.010415 | 0.241094 | 4.532853 | 1.01E-18 | 1.39E-17 |
| HM13-IT1   | 0.780745 | 1.633856 | 1.065358 | 1.46E-09 | 5.40E-09 |
| AC244153.1 | 3.232227 | 0.611412 | -2.40231 | 1.04E-26 | 5.28E-25 |

|            |          |          |          |          |          |
|------------|----------|----------|----------|----------|----------|
| LINC02056  | 0.07794  | 0.0385   | -1.01751 | 5.83E-09 | 1.99E-08 |
| AL121906.1 | 0.038107 | 0.127048 | 1.73725  | 1.75E-05 | 3.63E-05 |
| LINC00355  | 0.012345 | 0.313151 | 4.664837 | 1.43E-06 | 3.51E-06 |
| AL136018.1 | 0.013323 | 0.102565 | 2.944514 | 0.000272 | 0.000474 |
| DLGAP1-AS2 | 0.759294 | 1.553834 | 1.033102 | 1.82E-05 | 3.77E-05 |

| Gene    | lncRNA       | cor      | pvalue   | Regulation |
|---------|--------------|----------|----------|------------|
| GUCY1A2 | AC037198.1   | 0.626216 | 1.76E-55 | postive    |
| PMM2    | AC037198.1   | 0.599993 | 6.39E-50 | postive    |
| PDE5A   | AC037198.1   | 0.668544 | 1.15E-65 | postive    |
| GUCY1A2 | AC130650.2   | 0.727249 | 6.16E-83 | postive    |
| PMM2    | AC130650.2   | 0.623099 | 8.61E-55 | postive    |
| PDE5A   | AC130650.2   | 0.77004  | 1.13E-98 | postive    |
| GUCY1A2 | AL109761.1   | 0.545735 | 6.46E-40 | postive    |
| PMM2    | AL109761.1   | 0.505227 | 1.48E-33 | postive    |
| PDE5A   | AL109761.1   | 0.564211 | 4.07E-43 | postive    |
| GUCY1A2 | DLEU1        | 0.7137   | 1.45E-78 | postive    |
| PMM2    | DLEU1        | 0.592275 | 2.22E-48 | postive    |
| PDE5A   | DLEU1        | 0.748343 | 2.69E-90 | postive    |
| AK1     | SFTA1P       | 0.571431 | 2.01E-44 | postive    |
| PDE8B   | AC112722.1   | 0.538768 | 9.25E-39 | postive    |
| GUCY1A2 | AC112722.1   | 0.600335 | 5.45E-50 | postive    |
| PDE5A   | AC112722.1   | 0.6241   | 5.19E-55 | postive    |
| GUCY1A2 | AC092279.1   | 0.51285  | 1.09E-34 | postive    |
| PMM2    | AC092279.1   | 0.525765 | 1.13E-36 | postive    |
| PDE5A   | AC092279.1   | 0.588918 | 1.01E-47 | postive    |
| CPT1B   | LENG8-AS1    | 0.506361 | 1.01E-33 | postive    |
| GUCY1A2 | AC127024.4   | 0.690649 | 1.11E-71 | postive    |
| PMM2    | AC127024.4   | 0.622274 | 1.31E-54 | postive    |
| PDE5A   | AC127024.4   | 0.740135 | 2.39E-87 | postive    |
| GPX3    | AC003092.1   | 0.886786 | #####    | postive    |
| XDH     | AC003092.1   | 0.544406 | 1.08E-39 | postive    |
| INPP4B  | NAALADL2-AS2 | 0.503086 | 3.04E-33 | postive    |
| AKR1B10 | MIR193BHG    | 0.550907 | 8.60E-41 | postive    |
| GUCY1A2 | NFYC-AS1     | 0.531495 | 1.40E-37 | postive    |
| PDE5A   | NFYC-AS1     | 0.629312 | 3.59E-56 | postive    |
| GUCY1A2 | AC108727.1   | 0.757111 | 1.42E-93 | postive    |
| PMM2    | AC108727.1   | 0.704974 | 7.01E-76 | postive    |
| PDE5A   | AC108727.1   | 0.779013 | #####    | postive    |
| PDE8B   | AC027277.2   | 0.516228 | 3.36E-35 | postive    |
| GUCY1A2 | AC027277.2   | 0.65253  | 1.28E-61 | postive    |
| PMM2    | AC027277.2   | 0.581823 | 2.32E-46 | postive    |
| PDE5A   | AC027277.2   | 0.768891 | 3.30E-98 | postive    |
| INPP4B  | AC027277.2   | 0.565923 | 2.01E-43 | postive    |
| GUCY1A2 | AP001469.2   | 0.553232 | 3.43E-41 | postive    |
| PMM2    | AP001469.2   | 0.522742 | 3.35E-36 | postive    |
| PDE5A   | AP001469.2   | 0.614755 | 5.50E-53 | postive    |
| AK7     | LINC01765    | 0.829009 | #####    | postive    |
| CYP2F1  | LINC01765    | 0.780566 | #####    | postive    |
| PDE5A   | AC021851.1   | 0.573679 | 7.77E-45 | postive    |

|         |            |          |          |         |
|---------|------------|----------|----------|---------|
| DTYMK   | CYTOR      | 0.567319 | 1.13E-43 | postive |
| NME1    | CYTOR      | 0.567308 | 1.13E-43 | postive |
| PDE5A   | AC015813.1 | 0.599861 | 6.80E-50 | postive |
| GSR     | AL033397.1 | 0.530112 | 2.32E-37 | postive |
| G6PD    | AL033397.1 | 0.556427 | 9.61E-42 | postive |
| GCLM    | AL033397.1 | 0.570337 | 3.19E-44 | postive |
| GUCY1A2 | NARF-IT1   | 0.564476 | 3.65E-43 | postive |
| PMM2    | NARF-IT1   | 0.596078 | 3.91E-49 | postive |
| PDE5A   | NARF-IT1   | 0.610618 | 4.13E-52 | postive |
| AOC3    | LINC01936  | 0.789209 | #####    | postive |
| FMO2    | LINC01936  | 0.734852 | 1.65E-85 | postive |
| ADH1B   | LINC01936  | 0.686594 | 1.54E-70 | postive |
| GSTM5   | LINC01936  | 0.68391  | 8.62E-70 | postive |
| INMT    | LINC01936  | 0.698302 | 6.80E-74 | postive |
| PMM2    | SAMD12-AS1 | 0.554536 | 2.05E-41 | postive |
| PDE5A   | SAMD12-AS1 | 0.547405 | 3.38E-40 | postive |
| GUCY1A2 | AL035409.1 | 0.549453 | 1.52E-40 | postive |
| PDE5A   | AL035409.1 | 0.614485 | 6.28E-53 | postive |
| GPD1    | AC026369.3 | 0.580555 | 4.04E-46 | postive |
| ALOX5   | AC026369.3 | 0.503321 | 2.81E-33 | postive |
| ACP5    | AC026369.3 | 0.573169 | 9.65E-45 | postive |
| GUCY1A2 | AC141002.1 | 0.623634 | 6.57E-55 | postive |
| PMM2    | AC141002.1 | 0.5601   | 2.19E-42 | postive |
| PDE5A   | AC141002.1 | 0.655299 | 2.66E-62 | postive |
| XDH     | Z98257.1   | 0.535228 | 3.49E-38 | postive |
| GUCY1A2 | DLEU2      | 0.695754 | 3.77E-73 | postive |
| PMM2    | DLEU2      | 0.644012 | 1.45E-59 | postive |
| PDE5A   | DLEU2      | 0.761481 | 2.91E-95 | postive |
| GPD1    | PARAL1     | 0.552404 | 4.77E-41 | postive |
| ALOX5   | PARAL1     | 0.502693 | 3.47E-33 | postive |
| HPGDS   | PARAL1     | 0.516248 | 3.34E-35 | postive |
| GUCY1A2 | AL136115.2 | 0.806659 | #####    | postive |
| PMM2    | AL136115.2 | 0.710625 | 1.32E-77 | postive |
| PDE5A   | AL136115.2 | 0.820999 | #####    | postive |
| PDE5A   | AC113139.1 | 0.536038 | 2.58E-38 | postive |
| PDE8B   | AC093788.1 | 0.506256 | 1.05E-33 | postive |
| GUCY1A2 | AC093788.1 | 0.777265 | #####    | postive |
| PMM2    | AC093788.1 | 0.645972 | 4.95E-60 | postive |
| PDE5A   | AC093788.1 | 0.795755 | #####    | postive |
| GUCY1A2 | LINC01655  | 0.533784 | 5.98E-38 | postive |
| PDE5A   | LINC01655  | 0.542789 | 2.01E-39 | postive |
| GUCY1A2 | AC097641.2 | 0.502485 | 3.72E-33 | postive |
| PMM2    | AC097641.2 | 0.522876 | 3.19E-36 | postive |
| PDE5A   | AC097641.2 | 0.61861  | 8.19E-54 | postive |

|         |            |          |          |         |
|---------|------------|----------|----------|---------|
| GUCY1A2 | EGOT       | 0.560764 | 1.67E-42 | postive |
| PDE5A   | EGOT       | 0.58101  | 3.31E-46 | postive |
| PDE8B   | CR936218.1 | 0.532028 | 1.15E-37 | postive |
| GUCY1A2 | CR936218.1 | 0.755371 | 6.50E-93 | postive |
| PMM2    | CR936218.1 | 0.672652 | 9.63E-67 | postive |
| PDE5A   | CR936218.1 | 0.80971  | #####    | postive |
| GUCY1A2 | MBNL1-AS1  | 0.758238 | 5.24E-94 | postive |
| PMM2    | MBNL1-AS1  | 0.506549 | 9.46E-34 | postive |
| PDE5A   | MBNL1-AS1  | 0.741486 | 7.96E-88 | postive |
| GUCY1A2 | AP001160.4 | 0.735262 | 1.19E-85 | postive |
| PMM2    | AP001160.4 | 0.621615 | 1.82E-54 | postive |
| PDE5A   | AP001160.4 | 0.752611 | 7.10E-92 | postive |
| GUCY1A2 | AL353804.2 | 0.760113 | 9.91E-95 | postive |
| PMM2    | AL353804.2 | 0.558932 | 3.51E-42 | postive |
| PDE5A   | AL353804.2 | 0.746618 | 1.15E-89 | postive |
| G6PD    | LINC00942  | 0.526207 | 9.63E-37 | postive |
| GCLM    | LINC00942  | 0.553449 | 3.15E-41 | postive |
| GUCY1A2 | LANCL1-AS1 | 0.611124 | 3.23E-52 | postive |
| ACADL   | LANCL1-AS1 | 0.684109 | 7.59E-70 | postive |
| PDE5A   | LANCL1-AS1 | 0.589952 | 6.33E-48 | postive |
| PDE8B   | EP300-AS1  | 0.551952 | 5.70E-41 | postive |
| GUCY1A2 | EP300-AS1  | 0.732602 | 9.74E-85 | postive |
| PMM2    | EP300-AS1  | 0.557594 | 6.02E-42 | postive |
| PDE5A   | EP300-AS1  | 0.733295 | 5.65E-85 | postive |
| DNMT3B  | AC012073.1 | 0.571178 | 2.24E-44 | postive |
| CAD     | AC012073.1 | 0.643888 | 1.55E-59 | postive |
| DNMT3A  | AC012073.1 | 0.643012 | 2.50E-59 | postive |
| POLE    | AC012073.1 | 0.55295  | 3.84E-41 | postive |
| AOC3    | HSPC324    | 0.634885 | 1.95E-57 | postive |
| PTGDS   | HSPC324    | 0.509458 | 3.51E-34 | postive |
| FMO2    | HSPC324    | 0.607815 | 1.59E-51 | postive |
| ADH1B   | HSPC324    | 0.601548 | 3.09E-50 | postive |
| GSTM5   | HSPC324    | 0.575411 | 3.72E-45 | postive |
| ACADL   | HSPC324    | 0.507287 | 7.36E-34 | postive |
| CA4     | HSPC324    | 0.764834 | 1.40E-96 | postive |
| ADCY4   | HSPC324    | 0.623714 | 6.31E-55 | postive |
| INMT    | HSPC324    | 0.665947 | 5.44E-65 | postive |
| PDE8B   | AC005856.1 | 0.56862  | 6.55E-44 | postive |
| GUCY1A2 | AC005856.1 | 0.806369 | #####    | postive |
| PMM2    | AC005856.1 | 0.574012 | 6.75E-45 | postive |
| PDE5A   | AC005856.1 | 0.851177 | #####    | postive |
| INPP4B  | AC005856.1 | 0.571966 | 1.61E-44 | postive |
| GUCY1A2 | AC253576.2 | 0.691095 | 8.26E-72 | postive |
| PMM2    | AC253576.2 | 0.609144 | 8.41E-52 | postive |

|         |            |          |          |         |
|---------|------------|----------|----------|---------|
| PDE5A   | AC253576.2 | 0.768098 | 6.90E-98 | postive |
| MAOB    | AL031058.1 | 0.534706 | 4.25E-38 | postive |
| CPT1B   | AL031600.1 | 0.593295 | 1.39E-48 | postive |
| PDE8B   | AP000692.1 | 0.50063  | 6.91E-33 | postive |
| GUCY1A2 | AP000692.1 | 0.67592  | 1.30E-67 | postive |
| PMM2    | AP000692.1 | 0.600545 | 4.94E-50 | postive |
| PDE5A   | AP000692.1 | 0.74465  | 5.90E-89 | postive |
| PMM2    | AL606489.1 | 0.526102 | 1.00E-36 | postive |
| PTGDS   | AL928742.1 | 0.50839  | 5.06E-34 | postive |
| GUCY1A2 | AL359697.1 | 0.688382 | 4.85E-71 | postive |
| PMM2    | AL359697.1 | 0.596769 | 2.85E-49 | postive |
| PDE5A   | AL359697.1 | 0.738284 | 1.07E-86 | postive |
| PMM2    | AC004596.1 | 0.540184 | 5.41E-39 | postive |
| PDE5A   | AC004596.1 | 0.522235 | 4.02E-36 | postive |
| PMM2    | AC084117.1 | 0.561255 | 1.37E-42 | postive |
| PDE5A   | AC084117.1 | 0.506702 | 8.98E-34 | postive |
| AK7     | AL121899.1 | 0.673707 | 5.05E-67 | postive |
| CYP2F1  | AL121899.1 | 0.666322 | 4.35E-65 | postive |
| GUCY1A2 | ALMS1-IT1  | 0.586061 | 3.60E-47 | postive |
| PMM2    | ALMS1-IT1  | 0.528953 | 3.55E-37 | postive |
| PDE5A   | ALMS1-IT1  | 0.587416 | 1.97E-47 | postive |
| CPT1B   | AC010973.2 | 0.55215  | 5.27E-41 | postive |
| PMM2    | AL157838.1 | 0.554741 | 1.89E-41 | postive |
| PDE5A   | AL157838.1 | 0.556494 | 9.36E-42 | postive |
| GUCY1A2 | AC078778.1 | 0.588539 | 1.19E-47 | postive |
| PMM2    | AC078778.1 | 0.593176 | 1.47E-48 | postive |
| PDE5A   | AC078778.1 | 0.633116 | 4.94E-57 | postive |
| GUCY1A2 | AP002907.1 | 0.73346  | 4.96E-85 | postive |
| PMM2    | AP002907.1 | 0.673456 | 5.89E-67 | postive |
| PDE5A   | AP002907.1 | 0.727655 | 4.51E-83 | postive |
| PYCR1   | MAFG-DT    | 0.541907 | 2.81E-39 | postive |
| CAD     | AC074117.1 | 0.520831 | 6.63E-36 | postive |
| DNMT3A  | AC074117.1 | 0.615126 | 4.59E-53 | postive |
| PLA2G3  | AC016773.1 | 0.558    | 5.11E-42 | postive |
| PYCR3   | AC138696.2 | 0.551704 | 6.28E-41 | postive |
| GUCY1A2 | AP000786.1 | 0.717616 | 8.41E-80 | postive |
| PMM2    | AP000786.1 | 0.575582 | 3.45E-45 | postive |
| PDE5A   | AP000786.1 | 0.673996 | 4.23E-67 | postive |
| CBR3    | AL391427.1 | 0.583952 | 9.13E-47 | postive |
| CBR1    | AL391427.1 | 0.52295  | 3.11E-36 | postive |
| UGT2B15 | LINC01559  | 0.503883 | 2.33E-33 | postive |
| GUCY1A2 | AP006621.2 | 0.515352 | 4.57E-35 | postive |
| PDE5A   | AP006621.2 | 0.594732 | 7.24E-49 | postive |
| GUCY1A2 | AC133644.2 | 0.580407 | 4.31E-46 | postive |

|         |                            |          |          |         |
|---------|----------------------------|----------|----------|---------|
| PMM2    | AC133644.2                 | 0.605762 | 4.24E-51 | postive |
| PDE5A   | AC133644.2                 | 0.601336 | 3.41E-50 | postive |
| AK7     | AL357093.2                 | 0.772976 | #####    | postive |
| CYP2F1  | AL357093.2                 | 0.702855 | 3.04E-75 | postive |
| GUCY1A2 | AC099343.2                 | 0.707494 | 1.21E-76 | postive |
| PMM2    | AC099343.2                 | 0.650838 | 3.32E-61 | postive |
| PDE5A   | AC099343.2                 | 0.783626 | #####    | postive |
| GUCY1A2 | ZKSCAN2-DT                 | 0.585483 | 4.65E-47 | postive |
| PMM2    | ZKSCAN2-DT                 | 0.538792 | 9.17E-39 | postive |
| PDE5A   | ZKSCAN2-DT                 | 0.643067 | 2.43E-59 | postive |
| CPT1B   | AL691482.3                 | 0.501648 | 4.92E-33 | postive |
| CPT1B   | AP001160.1                 | 0.500089 | 8.27E-33 | postive |
| GUCY1A2 | AC002128.1                 | 0.578677 | 9.12E-46 | postive |
| PMM2    | AC002128.1                 | 0.509199 | 3.84E-34 | postive |
| PDE5A   | AC002128.1                 | 0.652759 | 1.13E-61 | postive |
| GUCY1A2 | AC103591.3                 | 0.741972 | 5.35E-88 | postive |
| PMM2    | AC103591.3                 | 0.597157 | 2.38E-49 | postive |
| PDE5A   | AC103591.3                 | 0.70845  | 6.15E-77 | postive |
| CPT1B   | ASMTL-AS1                  | 0.522874 | 3.20E-36 | postive |
| GUCY1A2 | AC010186.3                 | 0.800139 | #####    | postive |
| PMM2    | AC010186.3                 | 0.677139 | 6.09E-68 | postive |
| PDE5A   | AC010186.3                 | 0.787197 | #####    | postive |
| ALOX5   | AC090559.1                 | 0.732513 | 1.04E-84 | postive |
| HK3     | AC090559.1                 | 0.657596 | 7.16E-63 | postive |
| HPGDS   | AC090559.1                 | 0.573169 | 9.65E-45 | postive |
| CPT1B   | STAG3L5P-<br>PVRIG2P-PILRB | 0.6158   | 3.29E-53 | postive |
| GUCY1A2 | AC090739.1                 | 0.811337 | #####    | postive |
| PMM2    | AC090739.1                 | 0.631138 | 1.39E-56 | postive |
| PDE5A   | AC090739.1                 | 0.822712 | #####    | postive |
| INPP4B  | AC090739.1                 | 0.526661 | 8.17E-37 | postive |
| GUCY1A2 | AP000873.2                 | 0.693875 | 1.32E-72 | postive |
| PMM2    | AP000873.2                 | 0.630021 | 2.49E-56 | postive |
| PDE5A   | AP000873.2                 | 0.736451 | 4.64E-86 | postive |
| GUCY1A2 | AC063965.1                 | 0.748978 | 1.57E-90 | postive |
| PMM2    | AC063965.1                 | 0.690505 | 1.22E-71 | postive |
| PDE5A   | AC063965.1                 | 0.759023 | 2.61E-94 | postive |
| PDE8B   | AC093110.1                 | 0.520236 | 8.19E-36 | postive |
| GUCY1A2 | AC093110.1                 | 0.66872  | 1.04E-65 | postive |
| ACADL   | AC093110.1                 | 0.507385 | 7.12E-34 | postive |
| PDE5A   | AC093110.1                 | 0.636365 | 8.90E-58 | postive |
| PDE5A   | LINC01535                  | 0.514628 | 5.88E-35 | postive |
| IL4I1   | USP30-AS1                  | 0.532581 | 9.34E-38 | postive |
| PLA2G2D | USP30-AS1                  | 0.545795 | 6.31E-40 | postive |



|         |             |          |          |         |
|---------|-------------|----------|----------|---------|
| GUCY1A2 | AC022150.4  | 0.666982 | 2.94E-65 | postive |
| PMM2    | AC022150.4  | 0.624064 | 5.28E-55 | postive |
| PDE5A   | AC022150.4  | 0.799262 | #####    | postive |
| LPGAT1  | AC022150.4  | 0.531001 | 1.67E-37 | postive |
| INPP4B  | AC022150.4  | 0.6066   | 2.84E-51 | postive |
| CPT1B   | AC005726.3  | 0.516974 | 2.59E-35 | postive |
| GUCY1A2 | AC004884.2  | 0.673188 | 6.94E-67 | postive |
| PMM2    | AC004884.2  | 0.636142 | 1.00E-57 | postive |
| PDE5A   | AC004884.2  | 0.700753 | 1.29E-74 | postive |
| GUCY1A2 | AC079684.1  | 0.569626 | 4.30E-44 | postive |
| PMM2    | AC079684.1  | 0.599602 | 7.67E-50 | postive |
| PDE5A   | AC079684.1  | 0.626281 | 1.71E-55 | postive |
| GUCY1A2 | AF131215.5  | 0.66745  | 2.22E-65 | postive |
| PDE5A   | AF131215.5  | 0.716674 | 1.68E-79 | postive |
| GUCY1A2 | AL132780.1  | 0.58746  | 1.93E-47 | postive |
| PMM2    | AL132780.1  | 0.544437 | 1.07E-39 | postive |
| PDE5A   | AL132780.1  | 0.640426 | 1.01E-58 | postive |
| PDE8B   | ANKRD10-IT1 | 0.541717 | 3.02E-39 | postive |
| GUCY1A2 | ANKRD10-IT1 | 0.702123 | 5.03E-75 | postive |
| PMM2    | ANKRD10-IT1 | 0.636123 | 1.01E-57 | postive |
| PDE5A   | ANKRD10-IT1 | 0.775754 | #####    | postive |
| CPT1B   | AL513320.1  | 0.535596 | 3.05E-38 | postive |
| PDE8B   | LINC00513   | 0.527679 | 5.64E-37 | postive |
| GUCY1A2 | LINC00513   | 0.749266 | 1.23E-90 | postive |
| PMM2    | LINC00513   | 0.642858 | 2.72E-59 | postive |
| PDE5A   | LINC00513   | 0.759801 | 1.31E-94 | postive |
| GUCY1A2 | AL590723.1  | 0.752041 | 1.16E-91 | postive |
| PMM2    | AL590723.1  | 0.688094 | 5.85E-71 | postive |
| PDE5A   | AL590723.1  | 0.785339 | #####    | postive |
| GUCY1A2 | AP003170.3  | 0.636463 | 8.45E-58 | postive |
| PMM2    | AP003170.3  | 0.561604 | 1.19E-42 | postive |
| PDE5A   | AP003170.3  | 0.681702 | 3.50E-69 | postive |
| GUCY1A2 | AC008115.3  | 0.760464 | 7.24E-95 | postive |
| PMM2    | AC008115.3  | 0.686036 | 2.21E-70 | postive |
| PDE5A   | AC008115.3  | 0.784577 | #####    | postive |
| INPP4B  | AC008115.3  | 0.503482 | 2.66E-33 | postive |
| PDE8B   | AC016590.2  | 0.519285 | 1.15E-35 | postive |
| GUCY1A2 | AC016590.2  | 0.665417 | 7.44E-65 | postive |
| PMM2    | AC016590.2  | 0.60927  | 7.91E-52 | postive |
| PDE5A   | AC016590.2  | 0.791752 | #####    | postive |
| LPGAT1  | AC016590.2  | 0.508707 | 4.54E-34 | postive |
| INPP4B  | AC016590.2  | 0.585534 | 4.54E-47 | postive |
| CPT1B   | AL022322.1  | 0.535123 | 3.63E-38 | postive |
| TXNRD1  | AC089983.1  | 0.515828 | 3.87E-35 | postive |

|         |            |          |          |         |
|---------|------------|----------|----------|---------|
| PDE8B   | AC096921.2 | 0.522977 | 3.08E-36 | postive |
| GUCY1A2 | AC096921.2 | 0.77799  | #####    | postive |
| PDE5A   | AC096921.2 | 0.760615 | 6.33E-95 | postive |
| GUCY1A2 | LINC01290  | 0.648576 | 1.17E-60 | postive |
| PDE5A   | LINC01290  | 0.654367 | 4.53E-62 | postive |
| GUCY1A2 | AC007546.1 | 0.800954 | #####    | postive |
| PMM2    | AC007546.1 | 0.663429 | 2.41E-64 | postive |
| PDE5A   | AC007546.1 | 0.796484 | #####    | postive |
| PDE8B   | AL109614.1 | 0.531071 | 1.63E-37 | postive |
| GUCY1A2 | AL109614.1 | 0.778771 | #####    | postive |
| PMM2    | AL109614.1 | 0.635418 | 1.47E-57 | postive |
| PDE5A   | AL109614.1 | 0.817684 | #####    | postive |
| INPP4B  | AL109614.1 | 0.504861 | 1.67E-33 | postive |
| GUCY1A2 | AP001429.1 | 0.78415  | #####    | postive |
| PMM2    | AP001429.1 | 0.681665 | 3.58E-69 | postive |
| PDE5A   | AP001429.1 | 0.771912 | 1.93E-99 | postive |
| GUCY1A2 | AC004253.1 | 0.567704 | 9.60E-44 | postive |
| PDE5A   | AC004253.1 | 0.589845 | 6.64E-48 | postive |
| AOC3    | FENDRR     | 0.65632  | 1.49E-62 | postive |
| FMO2    | FENDRR     | 0.623208 | 8.15E-55 | postive |
| ADH1B   | FENDRR     | 0.652696 | 1.17E-61 | postive |
| GSTM5   | FENDRR     | 0.510387 | 2.55E-34 | postive |
| ACADL   | FENDRR     | 0.591453 | 3.22E-48 | postive |
| CA4     | FENDRR     | 0.827096 | #####    | postive |
| ADCY4   | FENDRR     | 0.663531 | 2.27E-64 | postive |
| INMT    | FENDRR     | 0.68685  | 1.31E-70 | postive |
| CPT1B   | AC027796.4 | 0.529143 | 3.31E-37 | postive |
| PDE5A   | LINC01389  | 0.583312 | 1.21E-46 | postive |
| GUCY1A2 | AC245014.3 | 0.809549 | #####    | postive |
| PMM2    | AC245014.3 | 0.622767 | 1.02E-54 | postive |
| PDE5A   | AC245014.3 | 0.808334 | #####    | postive |
| INPP4B  | AC245014.3 | 0.528864 | 3.66E-37 | postive |
| PDE5A   | AC048341.2 | 0.635028 | 1.81E-57 | postive |
| PDE5A   | AL080317.1 | 0.538798 | 9.15E-39 | postive |
| GUCY1A2 | AP000866.6 | 0.755465 | 5.98E-93 | postive |
| PMM2    | AP000866.6 | 0.591835 | 2.71E-48 | postive |
| PDE5A   | AP000866.6 | 0.759887 | 1.21E-94 | postive |
| GUCY1A2 | AP001432.1 | 0.615028 | 4.81E-53 | postive |
| PMM2    | AP001432.1 | 0.599984 | 6.42E-50 | postive |
| PDE5A   | AP001432.1 | 0.722109 | 3.01E-81 | postive |
| GUCY1A2 | AL133243.2 | 0.771312 | 3.41E-99 | postive |
| PMM2    | AL133243.2 | 0.716417 | 2.02E-79 | postive |
| PDE5A   | AL133243.2 | 0.801015 | #####    | postive |
| PRIM1   | TMPO-AS1   | 0.566421 | 1.64E-43 | postive |

|         |            |          |          |         |
|---------|------------|----------|----------|---------|
| TYMS    | TMPO-AS1   | 0.51293  | 1.06E-34 | postive |
| POLE    | TMPO-AS1   | 0.5509   | 8.62E-41 | postive |
| RRM2    | TMPO-AS1   | 0.591713 | 2.86E-48 | postive |
| CPT1B   | AL928654.2 | 0.525815 | 1.11E-36 | postive |
| POLE    | AC091057.1 | 0.601418 | 3.29E-50 | postive |
| PDE5A   | AL132657.1 | 0.523142 | 2.90E-36 | postive |
| GUCY1A2 | AC139887.4 | 0.731172 | 2.98E-84 | postive |
| PMM2    | AC139887.4 | 0.553988 | 2.54E-41 | postive |
| PDE5A   | AC139887.4 | 0.746983 | 8.44E-90 | postive |
| AKR1B10 | AC129507.4 | 0.539297 | 7.58E-39 | postive |
| PLA2G1B | GATA6-AS1  | 0.523565 | 2.50E-36 | postive |
| GUCY1A2 | SAP30L-AS1 | 0.789616 | #####    | postive |
| PMM2    | SAP30L-AS1 | 0.604953 | 6.22E-51 | postive |
| PDE5A   | SAP30L-AS1 | 0.80276  | #####    | postive |
| GUCY1A2 | AC245884.8 | 0.591399 | 3.30E-48 | postive |
| PMM2    | AC245884.8 | 0.515795 | 3.92E-35 | postive |
| PDE5A   | AC245884.8 | 0.694266 | 1.02E-72 | postive |
| GUCY1A2 | AC138207.4 | 0.638219 | 3.31E-58 | postive |
| PMM2    | AC138207.4 | 0.562802 | 7.27E-43 | postive |
| PDE5A   | AC138207.4 | 0.649178 | 8.39E-61 | postive |
| GUCY1A2 | AC007014.2 | 0.793379 | #####    | postive |
| PMM2    | AC007014.2 | 0.692514 | 3.25E-72 | postive |
| PDE5A   | AC007014.2 | 0.767031 | 1.85E-97 | postive |
| CPT1B   | AC020907.4 | 0.593115 | 1.51E-48 | postive |
| AK7     | SRGAP3-AS2 | 0.821555 | #####    | postive |
| CYP2F1  | SRGAP3-AS2 | 0.861974 | #####    | postive |
| GUCY1A2 | MAGI2-AS3  | 0.677081 | 6.32E-68 | postive |
| PDE5A   | MAGI2-AS3  | 0.725244 | 2.84E-82 | postive |
| GUCY1A2 | HIF1A-AS2  | 0.525144 | 1.41E-36 | postive |
| PMM2    | HIF1A-AS2  | 0.600709 | 4.58E-50 | postive |
| PDE5A   | HIF1A-AS2  | 0.572763 | 1.15E-44 | postive |
| AOC3    | TBX5-AS1   | 0.788938 | #####    | postive |
| FMO2    | TBX5-AS1   | 0.720779 | 8.13E-81 | postive |
| ADH1B   | TBX5-AS1   | 0.615159 | 4.51E-53 | postive |
| PLPP3   | TBX5-AS1   | 0.538687 | 9.54E-39 | postive |
| GSTM5   | TBX5-AS1   | 0.747634 | 4.89E-90 | postive |
| PLA2G5  | TBX5-AS1   | 0.538518 | 1.02E-38 | postive |
| INMT    | TBX5-AS1   | 0.664692 | 1.14E-64 | postive |
| HK3     | LINC02345  | 0.51664  | 2.91E-35 | postive |
| HPGDS   | LINC02345  | 0.516163 | 3.44E-35 | postive |
| PDE2A   | AC027031.2 | 0.533763 | 6.03E-38 | postive |
| GUCY1A2 | AP002336.2 | 0.76944  | 1.98E-98 | postive |
| PMM2    | AP002336.2 | 0.68748  | 8.71E-71 | postive |
| PDE5A   | AP002336.2 | 0.781299 | #####    | postive |

|         |            |          |          |         |
|---------|------------|----------|----------|---------|
| GUCY1A2 | AP001528.2 | 0.579925 | 5.31E-46 | postive |
| PDE5A   | AP001528.2 | 0.571878 | 1.67E-44 | postive |
| IL4I1   | AC004585.1 | 0.515503 | 4.34E-35 | postive |
| PLA2G2D | AC004585.1 | 0.681856 | 3.18E-69 | postive |
| GUCY1A2 | AC010834.3 | 0.702919 | 2.91E-75 | postive |
| PMM2    | AC010834.3 | 0.639848 | 1.38E-58 | postive |
| PDE5A   | AC010834.3 | 0.742917 | 2.46E-88 | postive |
| CPT1B   | AP006284.1 | 0.533202 | 7.42E-38 | postive |
| CPT1B   | AC087741.1 | 0.665034 | 9.34E-65 | postive |
| CPT1B   | AC008735.2 | 0.570643 | 2.81E-44 | postive |
| GUCY1A2 | AL031717.1 | 0.505282 | 1.45E-33 | postive |
| PMM2    | AL031717.1 | 0.594768 | 7.13E-49 | postive |
| PDE5A   | AL031717.1 | 0.578324 | 1.06E-45 | postive |
| GUCY1A2 | AC104695.3 | 0.684489 | 5.96E-70 | postive |
| PMM2    | AC104695.3 | 0.655626 | 2.21E-62 | postive |
| PDE5A   | AC104695.3 | 0.730439 | 5.27E-84 | postive |
| GUCY1A2 | AC083949.1 | 0.600086 | 6.12E-50 | postive |
| PMM2    | AC083949.1 | 0.555421 | 1.44E-41 | postive |
| PDE5A   | AC083949.1 | 0.6812   | 4.81E-69 | postive |
| PDE8B   | Z82243.1   | 0.526576 | 8.42E-37 | postive |
| GUCY1A2 | Z82243.1   | 0.710394 | 1.55E-77 | postive |
| PMM2    | Z82243.1   | 0.667436 | 2.24E-65 | postive |
| PDE5A   | Z82243.1   | 0.777002 | #####    | postive |
| INPP4B  | Z82243.1   | 0.542737 | 2.05E-39 | postive |
| GUCY1A2 | AL355488.1 | 0.59286  | 1.70E-48 | postive |
| PMM2    | AL355488.1 | 0.517657 | 2.04E-35 | postive |
| PDE5A   | AL355488.1 | 0.659486 | 2.40E-63 | postive |
| GUCY1A2 | AL662844.3 | 0.602657 | 1.84E-50 | postive |
| PMM2    | AL662844.3 | 0.540714 | 4.43E-39 | postive |
| PDE5A   | AL662844.3 | 0.725849 | 1.79E-82 | postive |
| PMM2    | AC139887.2 | 0.523522 | 2.53E-36 | postive |
| PDE5A   | AC139887.2 | 0.578352 | 1.05E-45 | postive |
| CPT1B   | SNHG12     | 0.53758  | 1.45E-38 | postive |
| GUCY1A2 | AF117829.1 | 0.670731 | 3.09E-66 | postive |
| PMM2    | AF117829.1 | 0.716633 | 1.73E-79 | postive |
| PDE5A   | AF117829.1 | 0.739102 | 5.52E-87 | postive |
| GUCY1A2 | MCM3AP-AS1 | 0.650672 | 3.64E-61 | postive |
| PMM2    | MCM3AP-AS1 | 0.58991  | 6.45E-48 | postive |
| PDE5A   | MCM3AP-AS1 | 0.717503 | 9.14E-80 | postive |
| GUCY1A2 | LINC01376  | 0.532992 | 8.02E-38 | postive |
| PMM2    | LINC01376  | 0.513849 | 7.72E-35 | postive |
| PDE5A   | LINC01376  | 0.578239 | 1.10E-45 | postive |
| GUCY1A2 | AC005021.1 | 0.650005 | 5.29E-61 | postive |
| PMM2    | AC005021.1 | 0.62807  | 6.81E-56 | postive |

|         |            |          |          |         |
|---------|------------|----------|----------|---------|
| PDE5A   | AC005021.1 | 0.695519 | 4.41E-73 | postive |
| GUCY1A2 | AL022067.1 | 0.803047 | #####    | postive |
| PMM2    | AL022067.1 | 0.646216 | 4.32E-60 | postive |
| PDE5A   | AL022067.1 | 0.765939 | 5.07E-97 | postive |
| INPP4B  | AL022067.1 | 0.50348  | 2.67E-33 | postive |
| GUCY1A2 | AC010168.2 | 0.657562 | 7.30E-63 | postive |
| PMM2    | AC010168.2 | 0.587175 | 2.19E-47 | postive |
| PDE5A   | AC010168.2 | 0.721935 | 3.43E-81 | postive |
| GUCY1A2 | AP001628.1 | 0.60183  | 2.71E-50 | postive |
| PDE5A   | AP001628.1 | 0.674318 | 3.48E-67 | postive |
| GUCY1A2 | AC025171.3 | 0.677702 | 4.30E-68 | postive |
| PMM2    | AC025171.3 | 0.526247 | 9.49E-37 | postive |
| PDE5A   | AC025171.3 | 0.72038  | 1.09E-80 | postive |
| INPP4B  | AC025171.3 | 0.516778 | 2.78E-35 | postive |
| GUCY1A2 | AC138393.3 | 0.713194 | 2.09E-78 | postive |
| PMM2    | AC138393.3 | 0.700046 | 2.08E-74 | postive |
| PDE5A   | AC138393.3 | 0.737292 | 2.37E-86 | postive |
| HK3     | AC108134.3 | 0.559846 | 2.42E-42 | postive |
| CA4     | AC108134.3 | 0.52379  | 2.30E-36 | postive |
| ADCY4   | AC108134.3 | 0.612834 | 1.41E-52 | postive |
| PMM2    | AC011676.1 | 0.540253 | 5.27E-39 | postive |
| PDE5A   | AC011676.1 | 0.544071 | 1.23E-39 | postive |
| GUCY1A2 | AC006017.1 | 0.727415 | 5.42E-83 | postive |
| PMM2    | AC006017.1 | 0.662145 | 5.11E-64 | postive |
| PDE5A   | AC006017.1 | 0.762954 | 7.71E-96 | postive |
| AK7     | AC013264.1 | 0.702164 | 4.89E-75 | postive |
| CYP2F1  | AC013264.1 | 0.65049  | 4.03E-61 | postive |
| PDE8B   | AC090579.1 | 0.508263 | 5.28E-34 | postive |
| GUCY1A2 | AC090579.1 | 0.734391 | 2.38E-85 | postive |
| PMM2    | AC090579.1 | 0.628064 | 6.83E-56 | postive |
| PDE5A   | AC090579.1 | 0.820793 | #####    | postive |
| INPP4B  | AC090579.1 | 0.577233 | 1.70E-45 | postive |
| CPT1B   | AC011462.4 | 0.528122 | 4.80E-37 | postive |
| GUCY1A2 | AL354989.1 | 0.645801 | 5.43E-60 | postive |
| PMM2    | AL354989.1 | 0.64772  | 1.89E-60 | postive |
| PDE5A   | AL354989.1 | 0.712323 | 3.91E-78 | postive |
| CPT1B   | AC006435.2 | 0.564098 | 4.27E-43 | postive |
| GUCY1A2 | AC026356.1 | 0.678642 | 2.39E-68 | postive |
| PMM2    | AC026356.1 | 0.625785 | 2.20E-55 | postive |
| PDE5A   | AC026356.1 | 0.711708 | 6.07E-78 | postive |
| INPP4B  | AC026356.1 | 0.529537 | 2.86E-37 | postive |
| CPT1B   | AC011498.6 | 0.558957 | 3.47E-42 | postive |
| PDE8B   | AL513365.2 | 0.510847 | 2.18E-34 | postive |
| GUCY1A2 | AL513365.2 | 0.842798 | #####    | postive |

|         |            |          |          |         |
|---------|------------|----------|----------|---------|
| PMM2    | AL513365.2 | 0.674052 | 4.09E-67 | postive |
| PDE5A   | AL513365.2 | 0.838297 | #####    | postive |
| GUCY1A2 | AC025171.4 | 0.604207 | 8.85E-51 | postive |
| PDE5A   | AC025171.4 | 0.656183 | 1.61E-62 | postive |
| GUCY1A2 | AL355075.2 | 0.695952 | 3.30E-73 | postive |
| PMM2    | AL355075.2 | 0.56031  | 2.01E-42 | postive |
| PDE5A   | AL355075.2 | 0.716108 | 2.53E-79 | postive |
| GUCY1A2 | AL513327.1 | 0.615661 | 3.52E-53 | postive |
| PMM2    | AL513327.1 | 0.613259 | 1.14E-52 | postive |
| PDE5A   | AL513327.1 | 0.658801 | 3.57E-63 | postive |
| PFKP    | AL731533.2 | 0.564057 | 4.34E-43 | postive |
| GUCY1A2 | AC139887.1 | 0.565235 | 2.67E-43 | postive |
| PMM2    | AC139887.1 | 0.510927 | 2.12E-34 | postive |
| PDE5A   | AC139887.1 | 0.640405 | 1.03E-58 | postive |
| PDE8B   | AC138932.5 | 0.509981 | 2.93E-34 | postive |
| GUCY1A2 | AC138932.5 | 0.797719 | #####    | postive |
| PMM2    | AC138932.5 | 0.720188 | 1.26E-80 | postive |
| PDE5A   | AC138932.5 | 0.819885 | #####    | postive |
| INPP4B  | AC138932.5 | 0.513246 | 9.51E-35 | postive |
| PDE5A   | AL117379.1 | 0.565919 | 2.01E-43 | postive |
| ALOX5   | LINC01150  | 0.542435 | 2.30E-39 | postive |
| HK3     | LINC01150  | 0.536972 | 1.82E-38 | postive |
| HPGDS   | LINC01150  | 0.574267 | 6.05E-45 | postive |
| AKR1B10 | AP003119.3 | 0.571069 | 2.35E-44 | postive |
| GUCY1A2 | AC016394.1 | 0.560515 | 1.85E-42 | postive |
| PMM2    | AC016394.1 | 0.525626 | 1.19E-36 | postive |
| PDE5A   | AC016394.1 | 0.640839 | 8.11E-59 | postive |
| GUCY1A2 | AL365277.1 | 0.756609 | 2.20E-93 | postive |
| PMM2    | AL365277.1 | 0.642221 | 3.84E-59 | postive |
| PDE5A   | AL365277.1 | 0.748637 | 2.10E-90 | postive |
| CPT1B   | AP006621.4 | 0.556039 | 1.12E-41 | postive |
| PDE8B   | AC008669.1 | 0.579228 | 7.19E-46 | postive |
| GUCY1A2 | AC008669.1 | 0.675015 | 2.26E-67 | postive |
| PDE5A   | AC008669.1 | 0.694782 | 7.21E-73 | postive |
| PRIM1   | AC099850.3 | 0.617142 | 1.70E-53 | postive |
| PRIM2   | AC099850.3 | 0.564323 | 3.89E-43 | postive |
| MTHFD2  | AC099850.3 | 0.516687 | 2.86E-35 | postive |
| POLE2   | AC099850.3 | 0.510289 | 2.64E-34 | postive |
| PAICS   | AC099850.3 | 0.561522 | 1.23E-42 | postive |
| CAD     | AC099850.3 | 0.505379 | 1.41E-33 | postive |
| GART    | AC099850.3 | 0.504366 | 1.98E-33 | postive |
| TYMS    | AC099850.3 | 0.575981 | 2.91E-45 | postive |
| POLE    | AC099850.3 | 0.526294 | 9.33E-37 | postive |
| RRM2    | AC099850.3 | 0.763407 | 5.11E-96 | postive |

|         |            |          |          |         |
|---------|------------|----------|----------|---------|
| PPAT    | AC099850.3 | 0.575821 | 3.12E-45 | postive |
| TK1     | AC099850.3 | 0.570323 | 3.21E-44 | postive |
| PDE5A   | AL158166.1 | 0.535751 | 2.87E-38 | postive |
| GUCY1A2 | AC011442.1 | 0.515293 | 4.67E-35 | postive |
| PMM2    | AC011442.1 | 0.571888 | 1.66E-44 | postive |
| PDE5A   | AC011442.1 | 0.605131 | 5.72E-51 | postive |
| PDE8B   | AC004908.2 | 0.50579  | 1.22E-33 | postive |
| GUCY1A2 | AC004908.2 | 0.694463 | 8.92E-73 | postive |
| PMM2    | AC004908.2 | 0.551704 | 6.28E-41 | postive |
| PDE5A   | AC004908.2 | 0.755142 | 7.93E-93 | postive |
| PDE5A   | AC026368.1 | 0.528319 | 4.47E-37 | postive |
| GUCY1A2 | KDM4A-AS1  | 0.598676 | 1.18E-49 | postive |
| PMM2    | KDM4A-AS1  | 0.528059 | 4.91E-37 | postive |
| PDE5A   | KDM4A-AS1  | 0.660834 | 1.10E-63 | postive |
| PDE8B   | AC007038.2 | 0.52782  | 5.36E-37 | postive |
| GUCY1A2 | AC007038.2 | 0.719632 | 1.90E-80 | postive |
| PMM2    | AC007038.2 | 0.610622 | 4.12E-52 | postive |
| PDE5A   | AC007038.2 | 0.776398 | #####    | postive |
| GUCY1A2 | AL049869.3 | 0.765206 | 9.93E-97 | postive |
| PMM2    | AL049869.3 | 0.685863 | 2.47E-70 | postive |
| PDE5A   | AL049869.3 | 0.808344 | #####    | postive |
| GUCY1A2 | AP001033.2 | 0.788337 | #####    | postive |
| PMM2    | AP001033.2 | 0.682678 | 1.89E-69 | postive |
| PDE5A   | AP001033.2 | 0.790038 | #####    | postive |
| AOC3    | AC093278.2 | 0.67804  | 3.48E-68 | postive |
| FMO2    | AC093278.2 | 0.657082 | 9.61E-63 | postive |
| ADH1B   | AC093278.2 | 0.655863 | 1.93E-62 | postive |
| PLPP3   | AC093278.2 | 0.503083 | 3.05E-33 | postive |
| GSTM5   | AC093278.2 | 0.562764 | 7.38E-43 | postive |
| ENPP2   | AC093278.2 | 0.509999 | 2.92E-34 | postive |
| ADCY4   | AC093278.2 | 0.555578 | 1.35E-41 | postive |
| INMT    | AC093278.2 | 0.633777 | 3.49E-57 | postive |
| PDE8B   | LINC01355  | 0.514649 | 5.84E-35 | postive |
| GUCY1A2 | LINC01355  | 0.710967 | 1.03E-77 | postive |
| PMM2    | LINC01355  | 0.610068 | 5.39E-52 | postive |
| PDE5A   | LINC01355  | 0.765383 | 8.44E-97 | postive |
| PDE5A   | AC011815.1 | 0.549856 | 1.30E-40 | postive |
| AOC3    | AP001189.3 | 0.695224 | 5.37E-73 | postive |
| FMO2    | AP001189.3 | 0.5147   | 5.74E-35 | postive |
| ADCY4   | AP001189.3 | 0.500823 | 6.48E-33 | postive |
| GUCY1A2 | AC124319.1 | 0.541023 | 3.94E-39 | postive |
| PMM2    | AC124319.1 | 0.600387 | 5.32E-50 | postive |
| PDE5A   | AC124319.1 | 0.580671 | 3.84E-46 | postive |
| GUCY1A2 | SCAANT1    | 0.533631 | 6.33E-38 | postive |

|         |             |          |          |         |
|---------|-------------|----------|----------|---------|
| PMM2    | SCAANT1     | 0.521192 | 5.83E-36 | postive |
| PDE5A   | SCAANT1     | 0.622648 | 1.08E-54 | postive |
| GOT1    | AC083809.1  | 0.610318 | 4.77E-52 | postive |
| AK7     | AL645924.1  | 0.795052 | #####    | postive |
| CYP2F1  | AL645924.1  | 0.715102 | 5.27E-79 | postive |
| CA4     | TBX2-AS1    | 0.507905 | 5.97E-34 | postive |
| ADCY4   | TBX2-AS1    | 0.516254 | 3.34E-35 | postive |
| GUCY1A2 | AL031667.3  | 0.526416 | 8.93E-37 | postive |
| PMM2    | AL031667.3  | 0.555099 | 1.63E-41 | postive |
| PDE5A   | AL031667.3  | 0.525285 | 1.34E-36 | postive |
| CPT1B   | AC006042.1  | 0.556318 | 1.00E-41 | postive |
| GUCY1A2 | AC090517.2  | 0.552362 | 4.85E-41 | postive |
| PDE5A   | AC090517.2  | 0.629285 | 3.64E-56 | postive |
| GUCY1A2 | AC079907.1  | 0.524149 | 2.02E-36 | postive |
| PDE5A   | AC079907.1  | 0.576824 | 2.03E-45 | postive |
| GUCY1A2 | AC073534.1  | 0.570683 | 2.76E-44 | postive |
| PDE5A   | AC073534.1  | 0.664965 | 9.73E-65 | postive |
| PDE8B   | LINC00894   | 0.503446 | 2.70E-33 | postive |
| GUCY1A2 | LINC00894   | 0.646893 | 2.98E-60 | postive |
| PMM2    | LINC00894   | 0.568218 | 7.75E-44 | postive |
| PDE5A   | LINC00894   | 0.741797 | 6.18E-88 | postive |
| PMM2    | AC007991.2  | 0.552465 | 4.65E-41 | postive |
| PDE5A   | AC007991.2  | 0.556005 | 1.14E-41 | postive |
| GSR     | AL365181.3  | 0.502881 | 3.26E-33 | postive |
| GUCY1A2 | AC026355.1  | 0.654104 | 5.26E-62 | postive |
| PMM2    | AC026355.1  | 0.543648 | 1.44E-39 | postive |
| PDE5A   | AC026355.1  | 0.680369 | 8.11E-69 | postive |
| GUCY1A2 | RPS6KA2-IT1 | 0.520437 | 7.62E-36 | postive |
| PMM2    | RPS6KA2-IT1 | 0.508947 | 4.18E-34 | postive |
| PDE5A   | RPS6KA2-IT1 | 0.514898 | 5.36E-35 | postive |
| CPT1B   | AL031186.1  | 0.535171 | 3.57E-38 | postive |
| GUCY1A2 | AC022211.1  | 0.55512  | 1.62E-41 | postive |
| PMM2    | AC022211.1  | 0.629419 | 3.39E-56 | postive |
| PDE5A   | AC022211.1  | 0.596795 | 2.81E-49 | postive |
| GUCY1A2 | AC020913.3  | 0.741081 | 1.11E-87 | postive |
| PMM2    | AC020913.3  | 0.709502 | 2.92E-77 | postive |
| PDE5A   | AC020913.3  | 0.758569 | 3.91E-94 | postive |
| GUCY1A2 | AC127024.5  | 0.638236 | 3.29E-58 | postive |
| PMM2    | AC127024.5  | 0.537246 | 1.64E-38 | postive |
| PDE5A   | AC127024.5  | 0.687876 | 6.74E-71 | postive |
| GUCY1A2 | LINC00630   | 0.740628 | 1.60E-87 | postive |
| PMM2    | LINC00630   | 0.638499 | 2.85E-58 | postive |
| PDE5A   | LINC00630   | 0.789255 | #####    | postive |
| INPP4B  | LINC00630   | 0.524011 | 2.13E-36 | postive |



|         |              |          |          |          |
|---------|--------------|----------|----------|----------|
| TXNRD1  | AC009275.1   | 0.534142 | 5.24E-38 | positive |
| GCLM    | AC009275.1   | 0.504691 | 1.77E-33 | positive |
| GPX2    | AC009275.1   | 0.523304 | 2.74E-36 | positive |
| GUCY1A2 | AC131971.1   | 0.794199 | #####    | positive |
| PMM2    | AC131971.1   | 0.70573  | 4.14E-76 | positive |
| PDE5A   | AC131971.1   | 0.78446  | #####    | positive |
| INPP4B  | AC131971.1   | 0.52465  | 1.69E-36 | positive |
| GUCY1A2 | AC026202.2   | 0.733592 | 4.47E-85 | positive |
| PMM2    | AC026202.2   | 0.633043 | 5.14E-57 | positive |
| PDE5A   | AC026202.2   | 0.772927 | #####    | positive |
| ENTPD8  | SLC25A25-AS1 | 0.515728 | 4.01E-35 | positive |
| GUCY1A2 | AC008870.2   | 0.560808 | 1.64E-42 | positive |
| PMM2    | AC008870.2   | 0.556383 | 9.78E-42 | positive |
| PDE5A   | AC008870.2   | 0.583875 | 9.44E-47 | positive |
| GPD1    | SMIM25       | 0.531981 | 1.17E-37 | positive |
| ALOX5   | SMIM25       | 0.647261 | 2.43E-60 | positive |
| HK3     | SMIM25       | 0.732404 | 1.14E-84 | positive |
| ACP5    | SMIM25       | 0.729964 | 7.61E-84 | positive |
| GUCY1A2 | AC007552.2   | 0.679974 | 1.04E-68 | positive |
| PMM2    | AC007552.2   | 0.517669 | 2.03E-35 | positive |
| PDE5A   | AC007552.2   | 0.76645  | 3.17E-97 | positive |
| RDH10   | AC111149.2   | 0.528678 | 3.92E-37 | positive |
| PDE8B   | AC067817.2   | 0.509728 | 3.20E-34 | positive |
| GUCY1A2 | AC067817.2   | 0.759327 | 2.00E-94 | positive |
| PMM2    | AC067817.2   | 0.517374 | 2.25E-35 | positive |
| PDE5A   | AC067817.2   | 0.709286 | 3.41E-77 | positive |
| PDE8B   | LINC00216    | 0.511819 | 1.56E-34 | positive |
| GUCY1A2 | LINC00216    | 0.815292 | #####    | positive |
| PMM2    | LINC00216    | 0.692442 | 3.41E-72 | positive |
| PDE5A   | LINC00216    | 0.842598 | #####    | positive |
| INPP4B  | LINC00216    | 0.50743  | 7.02E-34 | positive |
| GUCY1A2 | DUBR         | 0.505567 | 1.32E-33 | positive |
| PDE5A   | DUBR         | 0.607544 | 1.81E-51 | positive |
| PDE5A   | TAPT1-AS1    | 0.513685 | 8.17E-35 | positive |
| PTGDS   | LINC01781    | 0.627537 | 8.96E-56 | positive |
| GUCY1A2 | AC018682.1   | 0.624168 | 5.01E-55 | positive |
| PMM2    | AC018682.1   | 0.649937 | 5.49E-61 | positive |
| PDE5A   | AC018682.1   | 0.643003 | 2.51E-59 | positive |
| GUCY1A2 | AP005899.1   | 0.617705 | 1.28E-53 | positive |
| PMM2    | AP005899.1   | 0.628387 | 5.79E-56 | positive |
| PDE5A   | AP005899.1   | 0.690094 | 1.59E-71 | positive |
| GUCY1A2 | AF131215.6   | 0.551421 | 7.03E-41 | positive |
| PDE5A   | AF131215.6   | 0.583244 | 1.25E-46 | positive |
| PDE8B   | AC010201.2   | 0.526224 | 9.57E-37 | positive |

|         |            |          |          |          |
|---------|------------|----------|----------|----------|
| GUCY1A2 | AC010201.2 | 0.706087 | 3.23E-76 | positive |
| PMM2    | AC010201.2 | 0.529482 | 2.92E-37 | positive |
| PDE5A   | AC010201.2 | 0.773367 | #####    | positive |

Supplementary materials Table Table 4

| lncRNA     | Coef     |
|------------|----------|
| MIR193BHG  | 0.113247 |
| AC245595.1 | 0.193863 |
| AC084859.1 | -0.20993 |
| MYOSLID    | 0.033207 |
| MIR22HG    | -0.05226 |
| HSPC324    | -0.15418 |
| LINP1      | 0.010916 |
| AL034397.3 | -0.11026 |
| AC102953.2 | 0.12467  |
| LINC01703  | 0.191701 |
| AC084117.1 | 0.149958 |
